# Supplementary material for: The Plasmodium falciparum apicoplast cysteine desulfurase provides sulfur for both iron-sulfur cluster assembly and tRNA modification
Source: eLife. 2023 May 11;12:e84491. doi: 10.7554/eLife.84491 (PMC10219651; doi:10.7554/eLife.84491)
Supplement: Figure 1—figure supplement 1—source data 1. [file elife-84491-fig1-figsupp1-data1.xlsx]

## Sheet: Sheet1
	Figure 1- figure supplement 1- source data 1			Table used for Figure 1- figure supplement 1(B)
	PCR reaction	Primer combination		Parasite line
		Forward	Reverse
	Δ5’	GOI.5F	pRS.R	Gene knockout lines
	Δ3’	pRS.F	GOI.3R
	5’	GOI.5F	GOI.5WTR
	3’	GOI.3WTF	GOI.3R
	Δ5’	GOI.5F	pRS.R	PfMev (parental)
	Δ3’	pRS.F	GOI.3R
	5’	GOI.5F	GOI.5WTR
	3’	GOI.3WTF	GOI.3R
