# Supplementary material for: The Plasmodium falciparum apicoplast cysteine desulfurase provides sulfur for both iron-sulfur cluster assembly and tRNA modification
Source: eLife. 2023 May 11;12:e84491. doi: 10.7554/eLife.84491 (PMC10219651; doi:10.7554/eLife.84491)
Supplement: Figure 1—figure supplement 1—source data 2. [file elife-84491-fig1-figsupp1-data2.xlsx]

## Sheet: Sheet1
	Figure 1- figure supplement 1- source data 2			Table used for Figure 1- figure supplement 1(C)
		Anticipated amplicon sizes (bp)
	Gene of interest	Δ5’	Δ3’	5’	3’
	sufC	467	389	486	457
	sufD	593	582	636	649
	sufE	490	543	556	656
	sufS	584	677	691	754
	mnmA	605	577	626	617
