# Supplementary material for: The Plasmodium falciparum apicoplast cysteine desulfurase provides sulfur for both iron-sulfur cluster assembly and tRNA modification
Source: eLife. 2023 May 11;12:e84491. doi: 10.7554/eLife.84491 (PMC10219651; doi:10.7554/eLife.84491)
Supplement: Figure 1—source data 2. [file elife-84491-fig1-data2.xlsx]

## Sheet: Fig1-sd2
	Figure 1- source data 2			Growth assay parasitemia counts for ∆sufC (top table) and ∆sufD (bottom table) used for Figure 1(E).
	Time (days)	Mev+								Mev-
	0	0.46	0.33	0.49	0.53	1.22	0.91	1.05	1.14	0.46	0.54	0.33	0.53	1.22	0.91	1.05	1.14
	1	0.47	0.43	0.45	0.5	1.28	1.5	1.43	1.38	0.19	0.32	0.3	0.19	0.88	1.1	0.84	0.77
	2	1.89	2.2	1.99	2.22	2.05	2.15	1.95	2.03	0.23	0.19	0.22	0.12	0.77	0.82	0.8	0.58
	3	3.75	3.91	3.97	4.25	4.44	4.37	4.51	4.22	0.26	0.16	0.14	0.13	0.861	0.67	0.63	0.59
	4	11.53	13.29	11.99	12.76	9.74	9.6	9.66	9.43	0.17	0.18	0.23	0.13	1.03	0.88	0.66	0.69
	Time (days)	Mev+								Mev-
	0	0.71	0.73	0.79	0.78	0.85	0.9	0.88	0.56	0.52	0.57	0.57	0.69	0.85	0.9	0.88	0.56
	1	0.55	0.64	0.51	0.59	0.7	0.68	0.78	0.8	0.33	0.43	0.32	0.31	0.51	0.54	0.65	0.58
	2	1.61	1.73	1.47	1.48	1.35	1.29	1.58	1.98	0.15	0.09	0.11	0.12	0.36	0.44	0.45	0.5
	3	4.11	3.98	4.14	3.93	3.7	3.82	3.74	4.2	0.26	0.11	0.23	0.3	0.248	0.45	0.387	0.421
	4	10.83	10.85	11.38	11.61	7.18	6.47	7.89	8.15	0.11	0.08	0.2	0.29	0.35	0.4	0.51	0.34
