# Supplementary material for: The Plasmodium falciparum apicoplast cysteine desulfurase provides sulfur for both iron-sulfur cluster assembly and tRNA modification
Source: eLife. 2023 May 11;12:e84491. doi: 10.7554/eLife.84491 (PMC10219651; doi:10.7554/eLife.84491)
Supplement: Figure 1—source data 3. [file elife-84491-fig1-data3.xlsx]

## Sheet: Fig1-sd3
	Figure 1- source data 3			∆sufC/sufD growth assay parasitemia counts used for Figure 1(I).
	Time (days)	Mev+								Mev-
	0	0.62	0.78	0.66	0.72	0.42	0.4	0.42	0.58	0.58	0.52	0.73	0.62	0.42	0.4	0.42	0.58
	1	0.8	0.76	0.69	0.77	0.68	0.72	0.67	0.46	0.27	0.31	0.42	0.3	0.38	0.44	0.33	0.54
	2	3.31	3.75	3.22	3.38	0.69	0.73	0.65	0.69	0.19	0.21	0.27	0.17	0.32	0.37	0.34	0.47
	3	5.81	6.65	6.07	6.71	7.28	7.92	8.84	2.17	0.16	0.17	0.15	0.18	0.33	0.33	0.35	0.26
	4	14.88	13.9	14.09	14.22	14.8	13.89	17.52	20.28	0.1	0.15	0.3	0.11	0.24	0.39	0.52	0.44
