# Supplementary material for: The Plasmodium falciparum apicoplast cysteine desulfurase provides sulfur for both iron-sulfur cluster assembly and tRNA modification
Source: eLife. 2023 May 11;12:e84491. doi: 10.7554/eLife.84491 (PMC10219651; doi:10.7554/eLife.84491)
Supplement: Figure 2—source data 2. [file elife-84491-fig2-data2.xlsx]

## Sheet: Fig2-sd2
	Figure 2- source data 2			∆sufE (top table) and ∆sufS (bottom table) growth assay parasitemia counts used for Figure 2(D).
	Time (days)	Mev+								Mev-
	0	0.64	0.79	0.59	0.66	0.36	0.26	0.28	0.47	0.65	0.59	0.69	0.73	0.36	0.26	0.28	0.47
	1	1.43	1.46	1.5	1.35	1.34	1.36	1.18	1.45	0.29	0.26	0.38	0.42	0.15	0.22	0.18	0.25
	2	3.58	3.46	3.29	3.63	2.8	2.95	2.6	3.19	0.15	0.26	0.26	0.24	0.12	0.16	0.1	0.13
	3	11.17	11.32	11.58	11.85	12.75	12.72	12.39	13.161	0.11	0.19	0.15	0.19	0.06	0.137	0.16	0.13
	4	15.74	16.91	17.08	16.7	17.8	18.42	18	18.568	0.18	0.12	0.12	0.16	0.072	0.11	0.1	0.095
	Time (days)	Mev+								Mev-
	0	0.18	0.53	0.79	0.46	0.24	0.37	0.43	0.44	0.79	0.56	0.56	0.52	0.24	0.37	0.43	0.44
	1	0.53	0.72	0.72	0.6	0.75	0.75	0.88	0.81	0.49	0.43	0.63	0.65	0.56	0.48	0.36	0.44
	2	4.4	4.5	4.86	4.36	1.05	0.87	1.2	1.14	0.37	0.23	0.41	0.29	1.15	0.83	0.98	0.97
	3	6.18	5.92	6.62	7.16	7.56	8.1	7.2	8.6	0.24	0.41	0.19	0.89	1.94	2.03	1.99	1.8
	4	15.41	14.82	13.55	13.15	16.5	20.22	18.51	22.5	0.48	0.22	0.6	0.77	1.18	1.68	1.868	1.27
