# Supplementary material for: The Plasmodium falciparum apicoplast cysteine desulfurase provides sulfur for both iron-sulfur cluster assembly and tRNA modification
Source: eLife. 2023 May 11;12:e84491. doi: 10.7554/eLife.84491 (PMC10219651; doi:10.7554/eLife.84491)
Supplement: Figure 3—figure supplement 1—source data 2. [file elife-84491-fig3-figsupp1-data2.xlsx]

## Sheet: Sheet1
	Figure 3- figure supplement 1- source data 2			Table used for Figure 3- figure supplement 1(A)
	Percentage (%) sequence identity among MnmA orthologs
		Pf MnmA	Sy MnmA	Bs MnmA	Ec MnmA
	Pf MnmA		22.7	25.75	24.92
	Sy MnmA	22.7		51.5	56.37
	Bs MnmA	25.75	51.5		69.92
	Ec MnmA	24.92	56.37	69.92
	At MnmA	27.64	43.97	51.58	52.37
