# Supplementary material for: The Plasmodium falciparum apicoplast cysteine desulfurase provides sulfur for both iron-sulfur cluster assembly and tRNA modification
Source: eLife. 2023 May 11;12:e84491. doi: 10.7554/eLife.84491 (PMC10219651; doi:10.7554/eLife.84491)
Supplement: Figure 3—figure supplement 3—source data 1. [file elife-84491-fig3-figsupp3-data1.xlsx]

## Sheet: Sheet1
	Figure 3- figure supplement 3- source data 1			Table used for Figure 3- figure supplement 3(D)
	Root mean square deviation (RMSD, Å) values for structural alignments of Ec MnmA (PDB id: 2DER) with MnmA homology models
	Sy MnmA	Bs MnmA	At MnmA	Sc Mtu1	Pf MnmA	Bm MnmA	Ta MnmA	Tg MnmA	Et MnmA
	0.181	0.924	0.219	0.153	0.264	0.17	0.2	0.153	0.943
