# Supplementary material for: The Plasmodium falciparum apicoplast cysteine desulfurase provides sulfur for both iron-sulfur cluster assembly and tRNA modification
Source: eLife. 2023 May 11;12:e84491. doi: 10.7554/eLife.84491 (PMC10219651; doi:10.7554/eLife.84491)
Supplement: Figure 3—figure supplement 4—source data 1. [file elife-84491-fig3-figsupp4-data1.xlsx]

## Sheet: Sheet1
	Figure 3- figure supplement 4- source data 1			Table used for Figure 3- figure supplement 4(B)
	PCR reaction	Primer combination		Anticipated amplicon sizes (bp)	Parasite line
		Forward	Reverse
	Δ5’	MnmAKD.5F	NewApt.5R	800	mnmA-flag
	Δ3’	HSP86KD.5F	MnmAKD.3R	596
	C	MnmAKD.5F	MnmAKD.3R	-
	Δ5’	MnmAKD.5F	NewApt.5R	-	PfMevattB (parental)
	Δ3’	HSP86KD.5F	MnmAKD.3R	-
	C	MnmAKD.5F	MnmAKD.3R	1160
