# Supplementary material for: The Plasmodium falciparum apicoplast cysteine desulfurase provides sulfur for both iron-sulfur cluster assembly and tRNA modification
Source: eLife. 2023 May 11;12:e84491. doi: 10.7554/eLife.84491 (PMC10219651; doi:10.7554/eLife.84491)
Supplement: Figure 3—figure supplement 5—source data 1. — The red boxes correspond to the cropped images in Figure 3—figure supplement 5. Blots were inverted for correct orientation. [file elife-84491-fig3-figsupp5-data1.zip]

Archive with 4 entries (4 files):
- Figure 3- figure supplement 5- source data 1/Figure 3- figure supplement 5- source data 1.pdf
- Figure 3- figure supplement 5- source data 1/Figure 3- figure supplement 5- source data 1.pptx
- Figure 3- figure supplement 5- source data 1/Figure 3- figure supplement5_bottom.tif
- Figure 3- figure supplement 5- source data 1/Figure 3- figure supplement5_top.tif
