# Supplementary material for: The Plasmodium falciparum apicoplast cysteine desulfurase provides sulfur for both iron-sulfur cluster assembly and tRNA modification
Source: eLife. 2023 May 11;12:e84491. doi: 10.7554/eLife.84491 (PMC10219651; doi:10.7554/eLife.84491)
Supplement: Figure 3—figure supplement 7—source data 1. [file elife-84491-fig3-figsupp7-data1.xlsx]

## Sheet: Fig3-fs7-sd1
		Figure 3- figure supplement 7- source data 1					Counts of intact apicoplasts presented in Figure 3- figure supplement 7.
					Control		Knockdown		Rescue
		Number of cells counted		Time (days)	Rep 1	Rep 2	Rep 1	Rep 2	Rep 1	Rep 2
				0	19	18	17	18	19	17
				2	15	21	15	18	18	19
				4	19	20	19	26	18	20
				6	18	20	23	27	19	22
				8	26	21	24	28	19	21
					Control		Knockdown		Rescue
		Number of cells with Intact apicoplast		Time (days)	Rep 1	Rep 2	Rep 1	Rep 2	Rep 1	Rep 2
				0	19	18	17	18	19	17
				2	15	21	15	18	18	19
				4	19	20	13	19	14	13
				6	18	20	8	8	9	8
				8	26	21	6	6	5	4
					Control		Knockdown		Rescue
		Number of cells with Intact apicoplast (%)		Time (days)	Rep 1	Rep 2	Rep 1	Rep 2	Rep 1	Rep 2
				0	1	1	1	1	1	1
				2	1	1	1	1	1	1
				4	1	1	0.684211	0.730769	0.777778	0.65
				6	1	1	0.347826	0.296296	0.473684	0.363636
				8	1	1	0.25	0.214286	0.263158	0.190476
