# Supplementary material for: The Plasmodium falciparum apicoplast cysteine desulfurase provides sulfur for both iron-sulfur cluster assembly and tRNA modification
Source: eLife. 2023 May 11;12:e84491. doi: 10.7554/eLife.84491 (PMC10219651; doi:10.7554/eLife.84491)
Supplement: Figure 3—figure supplement 8—source data 1. [file elife-84491-fig3-figsupp8-data1.xlsx]

## Sheet: Sheet1
	Figure 3- figure supplement 8- source data 1		Table used for Figure 3- figure supplement 8(F)
	Root mean square deviation (RMSD, Å) values for structural alignments of Ec SufE (PDB id: 1MZG) with homology models of Pf SufE and SufE-like domains of apicomplexan MnmA orthologs
	Pf SufE	0.664
	Pf MnmA	0.311
	Bm MnmA	1.2
	Ta MnmA	0.45
	Tg MnmA	1.203
	Et MnmA	1.066
