# Supplementary material for: The Plasmodium falciparum apicoplast cysteine desulfurase provides sulfur for both iron-sulfur cluster assembly and tRNA modification
Source: eLife. 2023 May 11;12:e84491. doi: 10.7554/eLife.84491 (PMC10219651; doi:10.7554/eLife.84491)
Supplement: Figure 3—figure supplement 8—source data 2. [file elife-84491-fig3-figsupp8-data2.xlsx]

## Sheet: Sheet1
	Figure 3- figure supplement 8- source data 2				Table used for Figure 3- figure supplement 8(H)
	Percentage (%) sequence identity of SufE-like domains
		Ec SufE	Pf SufE	Pf MnmA	Bm MnmA	Ta MnmA	Tg MnmA	Et MnmA
	Ec SufE		43.84	20.51	14.39	20.62	13.39	10.88
	Pf SufE	43.84		27.59	10.88	20.71	13.77	13.07
	Pf MnmA	20.51	27.59		16.52	35.48	18.5	15.04
	Bm MnmA	14.39	10.88	16.52		20.83	24.02	22.9
	Ta MnmA	20.62	20.71	35.48	20.83		19.92	16.23
