# Supplementary material for: The Plasmodium falciparum apicoplast cysteine desulfurase provides sulfur for both iron-sulfur cluster assembly and tRNA modification
Source: eLife. 2023 May 11;12:e84491. doi: 10.7554/eLife.84491 (PMC10219651; doi:10.7554/eLife.84491)
Supplement: Figure 3—source data 2. — The yellow highlighted row represents the expected parasitemia count after 1:10 dilution of day 4 parasites. [file elife-84491-fig3-data2.xlsx]

## Sheet: Fig3-sd2
	Figure 3- source data 2			mnmA-flag growth assay parasitemia counts used for Figure 3(F). The yellow highlighted row represents the expected parasitemia count after 1:10 dilution of day 4 parasites.
	Time (days)	Control (aTC+ Mev-)								Knockdown (aTC- Mev-)								Rescue (aTC- Mev+)
	0	0.72	0.7	0.58	0.74	0.4	0.44	0.37	0.39	0.68	0.68	0.83	0.84	0.38	0.45	0.42	0.42	0.9	0.81	0.75	0.69	0.35	0.39	0.38	0.4
	1	0.61	0.53	0.59	0.72	0.85	0.73	0.87	1.05	0.63	0.65	0.5	0.64	1.03	0.78	0.95	0.76	0.55	0.5	0.6	0.63	0.99	0.84	0.86	0.82
	2	1.61	1.55	1.6	1.47	2.27	2.23	2.23	2.27	1.45	1.44	1.43	1.3	2.73	2.21	2.78	2.69	1.64	1.44	1.88	1.48	2.37	2.22	2.38	2.34
	3	3.24	3.21	3.32	3.47	4.97	4.82	4.64	4.46	3.65	3.81	3.26	3.45	5.35	5.2	5.627	4.65	3.45	3.6	3.95	3.77	5.46	5.5	5.64	6.16
	4	9.54	9.02	8.48	8.97	7.37	8.27	8	7.32	9.06	9.33	8.97	9.11	8.68	9.07	8.89	7.91	10.58	9.5	10.21	10.33	10.11	10.59	10.44	9.85
	4	0.954	0.902	0.848	0.897	0.737	0.827	0.8	0.732	0.906	0.933	0.897	0.911	0.868	0.907	0.889	0.791	1.058	0.95	1.021	1.033	1.011	1.059	1.044	0.985
	5	2.48	2.43	2.31	2.14	2.08	2.1	2.32	1.88	1.29	1.11	1.11	1.44	1.28	1.27	1.1	1.31	1.71	1.5	1.69	1.72	3.36	2.81	2.96	2.82
	6	4.94	5.25	5.23	5.03	3.37	3.16	3.67	3.4	1.13	0.97	1.03	1.41	1.21	1.14	1.08	1.17	3.24	3.24	3.89	3.45	5.56	5.44	4.94	5.48
	7	15.58	14.62	15.8	14.73	9.68	9.89	10.13	10.45	1.66	1.34	1.36	1.41	0.87	0.77	0.8	0.72	8.44	8.18	8.55	8.48	18.5	16.59	16.18	17.4
	8	18.28	19.77	19.2	20.46	14.54	13.31	12.72	13.52	1.35	1.17	1.11	1.26	0.82	0.59	0.74	0.78	12.13	12.43	13.21	12.98	20.62	17.28	20.82	20.64
