# Supplementary material for: The Plasmodium falciparum apicoplast cysteine desulfurase provides sulfur for both iron-sulfur cluster assembly and tRNA modification
Source: eLife. 2023 May 11;12:e84491. doi: 10.7554/eLife.84491 (PMC10219651; doi:10.7554/eLife.84491)
Supplement: Figure 3—source data 3. [file elife-84491-fig3-data3.xlsx]

## Sheet: Fig3-sd3
	Figure 3- source data 3			Counts of intact apicoplasts presented in Figure 3(H).
				Control		Knockdown
	Number of cells counted		Time (days)	Rep 1	Rep 2	Rep 1	Rep 2
			0	19	18	17	18
			2	15	21	15	18
			4	19	20	19	26
			6	18	20	23	27
			8	26	21	24	28
				Control		Knockdown
	Number of cells with Intact apicoplast		Time (days)	Rep 1	Rep 2	Rep 1	Rep 2
			0	19	18	17	18
			2	15	21	15	18
			4	19	20	13	19
			6	18	20	8	8
			8	26	21	6	6
				Control		Knockdown
	Number of cells with Intact apicoplast (%)		Time (days)	Rep 1	Rep 2	Rep 1	Rep 2
			0	1	1	1	1
			2	1	1	1	1
			4	1	1	0.684211	0.730769
			6	1	1	0.347826	0.296296
			8	1	1	0.25	0.214286
