# Supplementary material for: The Plasmodium falciparum apicoplast cysteine desulfurase provides sulfur for both iron-sulfur cluster assembly and tRNA modification
Source: eLife. 2023 May 11;12:e84491. doi: 10.7554/eLife.84491 (PMC10219651; doi:10.7554/eLife.84491)
Supplement: Figure 3—source data 4. [file elife-84491-fig3-data4.xlsx]

## Sheet: Fig3-sd4
	Figure 3- source data 4			∆mnmA growth assay parasitemia counts used for Figure 3(L).
	Time (days)	Mev+								Mev-
	0	0.53	0.61	0.61	0.53	0.33	0.39	0.51	0.18	0.6	0.56	0.65	0.59	0.33	0.39	0.51	0.18
	1	1.29	1.15	1.09	1.26	1.671	0.36	0.87	1.11	0.25	0.29	0.29	0.24	0.42	0.129	0.498	0.561
	2	3.01	2.97	3.32	3.26	1.26	2.31	2.97	2.85	0.17	0.16	0.22	0.13	0.39	0.36	0.48	0.456
	3	9.67	9.75	10.75	10.94	8.73	9.999	10.227	10.845	0.18	0.13	0.19	0.21	0.513	0.336	0.33	0.57
	4	15.33	15.32	15.36	16.4	11.79	15.12	17.67	14.91	0.13	0.13	0.02	0.14	0.36	0.39	0.12	0.18
