# Supplementary material for: The Plasmodium falciparum apicoplast cysteine desulfurase provides sulfur for both iron-sulfur cluster assembly and tRNA modification
Source: eLife. 2023 May 11;12:e84491. doi: 10.7554/eLife.84491 (PMC10219651; doi:10.7554/eLife.84491)
Supplement: Figure 4—figure supplement 1—source data 1. [file elife-84491-fig4-figsupp1-data1.xlsx]

## Sheet: Sheet1
	Figure 4- figure supplement 1- source data 1			Table used for Figure 4- figure supplement 1(B)
	PCR reaction	Primer combination		Anticipated amplicon sizes (bp)	Parasite line
		Forward	Reverse
	attL	P230p.out.HA.F	attB.Int.F	642	bsmnmA+ /bsmnmA-yrvO+
	attR	attB.Int.R	P230p.out.HA.R	732
	attB	P230p.out.HA.F	P230p.out.HA.R	-
	attL	P230p.out.HA.F	attB.Int.F	-	PfMevattB (parental)
	attR	attB.Int.R	P230p.out.HA.R	-
	attB	P230p.out.HA.F	P230p.out.HA.R	1229
