# Supplementary material for: The Plasmodium falciparum apicoplast cysteine desulfurase provides sulfur for both iron-sulfur cluster assembly and tRNA modification
Source: eLife. 2023 May 11;12:e84491. doi: 10.7554/eLife.84491 (PMC10219651; doi:10.7554/eLife.84491)
Supplement: Figure 5—source data 2. [file elife-84491-fig5-data2.xlsx]

## Sheet: Fig5-sd2
	Figure 5- source data 2			bsmnmA-yrvO+∆mnmA growth assay parasitemia counts used for Figure 5(B).
	Time (days)	Mev+								Mev-
	0	0.33	0.23	0.28	0.46	0.53	0.63	0.58	0.42	0.33	0.23	0.28	0.46	0.53	0.63	0.58	0.42
	1	1.36	1.53	1.45	1.55	3.023	2.491	2.801	2.887	0.45	1.33	1.23	1.2	2.42	2.42	2.57	2.372
	2	1.99	2.217	2.539	2.433	4.99	4.217	3.539	4.433	2.18	2.48	2.414	2.18	4.18	4.48	4.414	4.18
	3	5.965	7.384	7.706	8.601	6.986	7.88	7.25	9.62	7.801	4.934	5.721	6.884	12.064	7.49	6.88	6.02
	4	9.7	9.47	9.13	9.17	16.53	12.59	16.28	15.15	8.25	7.62	7.83	7.85	11.05	10.43	11.07	10.78
