# Supplementary material for: The Plasmodium falciparum apicoplast cysteine desulfurase provides sulfur for both iron-sulfur cluster assembly and tRNA modification
Source: eLife. 2023 May 11;12:e84491. doi: 10.7554/eLife.84491 (PMC10219651; doi:10.7554/eLife.84491)
Supplement: Figure 5—source data 3. — The yellow highlighted row represents the expected parasitemia count after 1:10 dilution of day 4 parasites. [file elife-84491-fig5-data3.xlsx]

## Sheet: Fig5-sd3
	Figure 5- source data 3			bsmnmA-yrvO+∆mnmA growth assay parasitemia counts used for Figure 5(E). Yellow highlighted row represents expected parasitemia count after 1:10 dilution of day 4 parasites.
	Time (Days)	Permissive (aTC+ Shld-)								Non-permissive (aTC- Shld+)
	0	0.66	0.65	0.69	0.63	0.56	0.66	0.52	0.51	0.66	0.65	0.69	0.63	0.56	0.66	0.52	0.51
	1	0.98	1.13	1.09	1.09	0.54	0.52	0.55	0.39	0.91	0.62	0.84	0.71	0.59	0.47	0.43	0.47
	2	4.7	4.99	4.38	5	1.58	1.42	1.61	1.67	4.53	4.666	4.05	4.3	1.51	1.63	1.66	1.4
	3	8.24	8.28	8.23	8.14	5.99	5.69	5.82	5.3	7.38	7.51	7.11	6.92	3.93	3.97	3.7	3.59
	4	13.27	13.08	12.68	12.38	11.6	10.75	11.24	11.21	11.31	11.2	11.15	10.86	5.65	5.35	5.59	5.75
	4.00001	1.327	1.308	1.268	1.238	1.16	1.075	1.124	1.121	1.131	1.12	1.115	1.086	0.565	0.535	0.559	0.575
	5	1.13	1.04	1	1.13	5.61	6.25	5.55	5.65	1.76	1.48	1.47	1.83	0.86	0.7	0.89	1.07
	6	5.09	4.6	4.71	4.567	10.32	10.736	9.6	9.41	1.52	1.5	1.65	1.41	0.65	0.66	0.79	0.74
	7	8.27	7.52	6.92	8.41	16.49	16	16.37	16.12	1.05	1.19	1.1	1.02	0.519	0.496	0.512	0.55
	8	12.55	12.43	12.98	12.65	17.41	20.157	20.48	20.173	1.11	0.99	1.28	1.13	0.3	0.22	0.4	0.5
