# Supplementary material for: The Plasmodium falciparum apicoplast cysteine desulfurase provides sulfur for both iron-sulfur cluster assembly and tRNA modification
Source: eLife. 2023 May 11;12:e84491. doi: 10.7554/eLife.84491 (PMC10219651; doi:10.7554/eLife.84491)
Supplement: Figure 6—figure supplement 2—source data 1. — All parasites were cultured in presence of anhydrotetracycline (aTc). The yellow highlighted row represents the expected parasitemia count after 1:10 dilution of day 4 parasites. [file elife-84491-fig6-figsupp2-data1.xlsx]

## Sheet: Fig6-fs2-sd1
	Figure 6- figure supplement 2- source data 1						Growth assay parasitemia counts used for Figure 6- figure supplement 2. All parasites were cultured in presence of anhydrotetracycline (aTc). The yellow highlighted row represents the expected parasitemia count after 1:10 dilution of day 4 parasites.
	Time (days)	bsmnmA-yrvO+∆mnmA								bsmnmA+∆mnmA clone 10C								bsmnmA+∆mnmA clone 10E
	0	0.667	0.82	0.688	0.756	0.72	0.63	0.6	0.57	0.784	0.811	0.921	0.739	0.59	0.46	0.52	0.64	0.608	0.521	0.773	0.678	0.6	0.56	0.48	0.49
	1	1.67	1.83	1.726	1.469	1.97	1.22	1.06	1.75	1.22	1.17	1.4	1.6	2.54	2.909	2.863	2.473	1.14	1.4	1.38	1.476	2.36	1.887	2.335	2.578
	2	2.179	2.799	2.738	2.938	4.583	5.01	4.22	4.051	2.315	2.233	2.136	1.095	5.61	6.44	5.43	5.71	2.846	2.996	3.181	3.365	5.04	5.4	4.44	4.441
	3	1.97	3.31	3.23	3.26	8.36	5.57	9.89	5.98	1.74	2.48	3.053	1.9	10.77	8.94	9.15	5.57	6.62	8.22	5.737	6.16	4.79	5.31	6.082	5.94
	4	6.4	8.1	8.95	8.58	13.16	12.49	12.89	11.26	6.05	6.73	6.956	5.02	11.44	11.44	12.6	11.2	10.61	11.506	9.818	9.99	10.53	10.59	10.4	9.49
	4	0.64	0.81	0.895	0.858	1.316	1.249	1.289	1.126	0.605	0.673	0.6956	0.502	1.144	1.144	1.26	1.12	1.061	1.1506	0.9818	0.999	1.053	1.059	1.04	0.949
	5	0.98	1.84	2.18	1.84	1.61	1.3	1.272	1.945	1.23	1.18	1.56	0.91	1.05	1.02	1.058	1.01	4.01	3.68	2.57	3.33	1.23	0.89	1.13	1.28
	6	4.84	7.22	5.26	3.07	4.05	3.42	3.64	4.64	3.81	3.95	4.32	3.14	3.81	3.8	3.87	3.71	5.57	6.67	4.686	5.7	3.72	3.97	3.9	3.84
	7	10.787	10.78	6.65	3.99	5.89	4.31	4.56	8.86	4.98	7.15	6.17	4.22	5.75	4.94	5.81	4.955	12.44	12.4	8.95	7.33	4.92	5.16	5.63	5.36
	8	15.58	15.81	15.47	15.43	9.84	8.83	9.66	11.14	11.63	12.16	12.25	9.8	8.01	9.26	9.61	8.13	15.21	15.41	13.67	13.88	9.84	8.1	8.05	8.08
