# Supplementary material for: The Plasmodium falciparum apicoplast cysteine desulfurase provides sulfur for both iron-sulfur cluster assembly and tRNA modification
Source: eLife. 2023 May 11;12:e84491. doi: 10.7554/eLife.84491 (PMC10219651; doi:10.7554/eLife.84491)
Supplement: Figure 6—source data 2. [file elife-84491-fig6-data2.xlsx]

## Sheet: Fig6-sd2
	Figure 6- source data 2			bsmnmA+∆mnmA growth assay parasitemia counts used for Figure 6(B).
	Time (days)	Mev+								Mev-
	0	0.7	0.66	0.64	0.67	0.23	0.61	0.45	0.4	0.7	0.66	0.64	0.67	0.23	0.61	0.45	0.4
	1	0.99	1.16	1.11	1.22	1.03	1.24	1.097	1.19	0.87	1.16	1.041	1.16	1.14	1.296	0.89	1.287
	2	4.143	4.145	4.125	4.216	2.09	2.13	1.9	2.1	4.11	2.67	2.55	3.248	1.77	1.99	1.68	1.84
	3	5.397	7.694	7.317	7.767	3.813	4.88	2.74	3.87	5.176	5.823	4.472	5.444	3.448	3.58	2.59	3.27
	4	11.86	11.12	11.54	11.65	10.11	6.64	7.02	7.38	8.71	8.24	7.86	8.08	7.402	4.8	5.25	5.41
