# Supplementary material for: The Plasmodium falciparum apicoplast cysteine desulfurase provides sulfur for both iron-sulfur cluster assembly and tRNA modification
Source: eLife. 2023 May 11;12:e84491. doi: 10.7554/eLife.84491 (PMC10219651; doi:10.7554/eLife.84491)
Supplement: Figure 6—source data 3. — The yellow highlighted row represents the expected parasitemia count after 1:10 dilution of day 4 parasites. [file elife-84491-fig6-data3.xlsx]

## Sheet: Fig6-sd3
	Figure 6- source data 3			bsmnmA+∆mnmA growth assay parasitemia counts used for Figure 6(E). The yellow highlighted row represents the expected parasitemia count after 1:10 dilution of day 4 parasites.
	Time (Days)	Permissive (aTC+ Shld-)								Non-permissive (aTC- Shld+)
	0	0.6	0.57	0.57	0.65	0.5	0.51	0.58	0.46	0.6	0.57	0.57	0.65	0.5	0.51	0.58	0.46
	1	1.291	1.22	1.11	1.189	0.71	0.72	0.58	0.81	1	1.07	1.05	1.15	0.7	0.67	0.71	0.66
	2	2.902	2.452	2.728	2.522	2.77	2.8	2.65	2.61	2.477	1.988	2.19	2.156	2.33	2.42	2.48	2.23
	3	8.609	8.239	9.035	7.19	5.365	5.47	5.37	5.06	4.531	4.8	4.823	4.295	4.77	4.65	4.58	4.52
	4	10.515	9.796	10.468	9.798	10.56	11.45	10.75	11.24	5.434	5.701	5.91	6.267	3.81	3.27	3.8	3.64
	4.00001	1.051	0.979	1.046	0.979	1.056	1.145	1.075	1.124	0.543	0.57	0.591	0.626	0.381	0.327	0.38	0.364
	5	4.76	4.73	5.24	4.29	2.97	2.98	3.15	3.63	0.39	0.48	0.44	0.6	0.54	0.56	0.45	0.42
	6	6.41	6.24	6.96	6.04	5.62	5	6.2	6.18	0.38	0.6	0.37	0.43	0.408	0.57	0.71	0.657
	7	9.2	9.57	8.68	9.69	12.17	11.48	11.81	11.55	0.18	0.16	0.14	0.28	0.3	0.34	0.43	0.23
	8	10.71	11.14	9.86	11.29	13.43	12.58	13.38	14.54	0.13	0.12	0.15	0.14	0.18	0.23	0.18	0.15
