# Supplementary material for: The Plasmodium falciparum apicoplast cysteine desulfurase provides sulfur for both iron-sulfur cluster assembly and tRNA modification
Source: eLife. 2023 May 11;12:e84491. doi: 10.7554/eLife.84491 (PMC10219651; doi:10.7554/eLife.84491)
Supplement: Figure 7—source data 2. [file elife-84491-fig7-data2.xlsx]

## Sheet: Fig7-sd2
	Figure 7- source data 2			bsmnmA-yrvO+∆sufS growth assay parasitemia counts used for Figure 7(E).
	Time (days)	Mev+								Mev-
	0	0.65	0.51	0.65	0.64	0.51	0.46	0.72	0.41	0.65	0.51	0.65	0.64	0.51	0.46	0.72	0.41
	1	2.33	2.09	2.02	1.79	1.06	0.88	1.07	1.1	0.63	0.7	0.72	0.52	0.49	0.47	0.58	0.57
	2	3.96	4.3	4.07	4.07	3.81	3.79	3.95	4.23	0.54	0.36	0.38	0.36	0.36	0.32	0.27	0.35
	3	10.87	10.52	10.889	11.37	7.85	7.79	8.33	7.92	0.37	0.34	0.27	0.42	0.25	0.17	0.13	0.15
	4	16.23	16.42	15.63	16.05	10.76	10.84	10.53	10.36	0.22	0.26	0.15	0.35	0.14	0.15	0.19	0.17
