# Supplementary material for: The Plasmodium falciparum apicoplast cysteine desulfurase provides sulfur for both iron-sulfur cluster assembly and tRNA modification
Source: eLife journal article supplement (doi:10.7554/elife.84491), 2023-05-11

**A**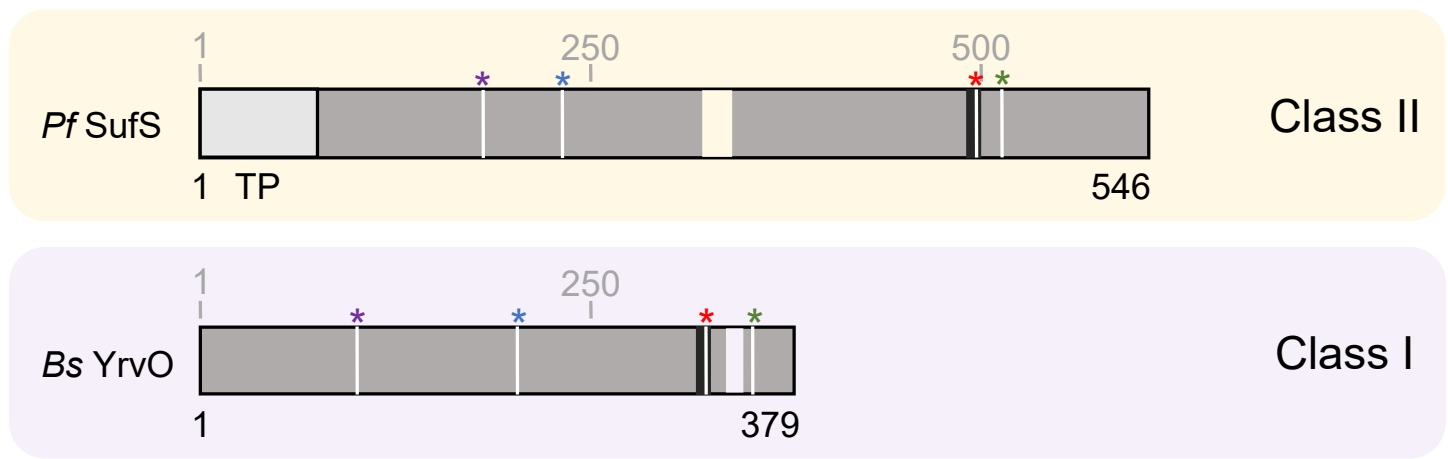

■ Class identifier sequence motif; Class I : SSGSACT, Class II : RXGHHCA  
 ■ Class I specific insertion    ■ Class II specific insertion    \* PLP-binding lysine  
 \* Catalytic histidine    \* Catalytic cysteine    \* Reaction stabilizing arginine

**B**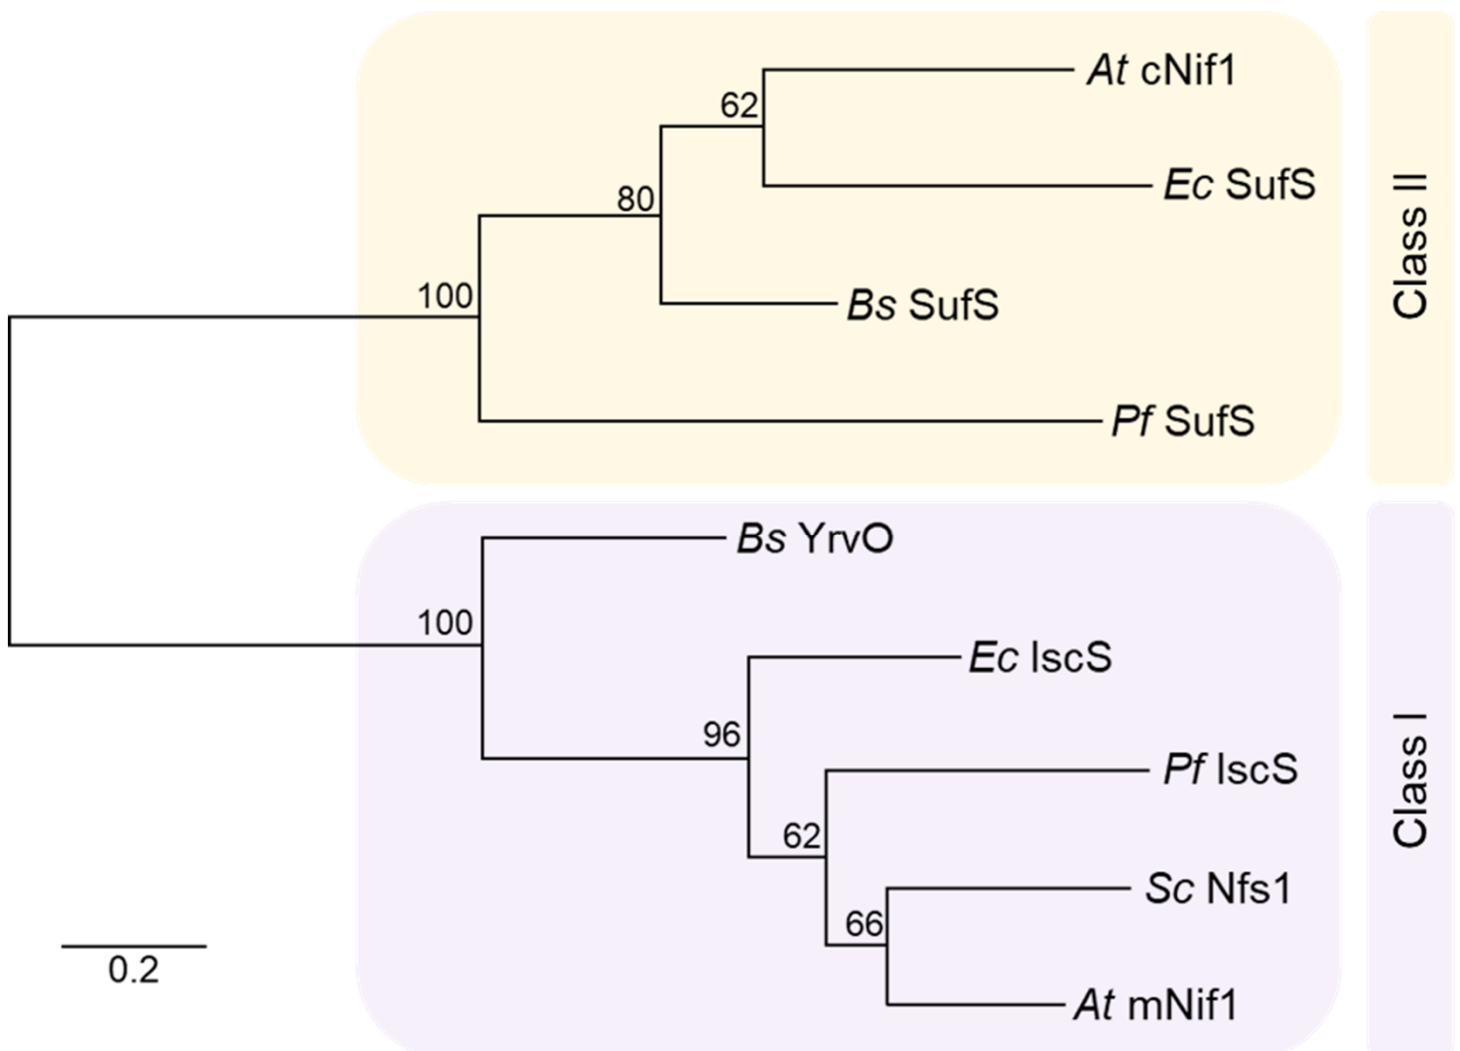

Supplement: supp [file elife-84491-supp-v1.zip]
