# Supplementary material for: The Plasmodium falciparum apicoplast cysteine desulfurase provides sulfur for both iron-sulfur cluster assembly and tRNA modification
Source: eLife journal article supplement (doi:10.7554/elife.84491), 2023-05-11
Supplement: supp [file elife-84491-supp-v1.zip]

|                      |                                                               |     |
|----------------------|---------------------------------------------------------------|-----|
| <i>P. falciparum</i> | -----                                                         | 0   |
| <i>B. microti</i>    | -----                                                         | 0   |
| <i>T. annulata</i>   | -----                                                         | 0   |
| <i>T. gondii</i>     | MFLSSLGGCKSLSAVLFLLLFVLDPRQASPLATSVASAAGSSAWLPAALPRSSGVRPPDQ  | 60  |
| <i>E. tenella</i>    | -----                                                         | 0   |
| <i>P. falciparum</i> | -----                                                         | 0   |
| <i>B. microti</i>    | -----                                                         | 0   |
| <i>T. annulata</i>   | -----                                                         | 0   |
| <i>T. gondii</i>     | SRRLGRSAPRGNADNLQQLPSONGVRRRRSVSWARGLPALFRAAADEGTEGGTRSDPRED  | 120 |
| <i>E. tenella</i>    | -----                                                         | 0   |
| <i>P. falciparum</i> | -----MLIFFEFFFFFKYIY-                                         | 15  |
| <i>B. microti</i>    | -----                                                         | 0   |
| <i>T. annulata</i>   | -----MFKNVVL--LYNYLFFIFLNH                                    | 19  |
| <i>T. gondii</i>     | DACSLLPSSHRPSWQLRGDAAGASLNEKSGKTRRRSGSHPWVRSVAKHREPRWTYTSLSH  | 180 |
| <i>E. tenella</i>    | -----MRAFLLELFFLVL--                                          | 12  |
| <i>P. falciparum</i> | -----NIFILTCFYITLSSYYFIISFIFSTLMFFYFCTFYVISLFFLYISSFCKSIKV    | 68  |
| <i>B. microti</i>    | -----                                                         | 0   |
| <i>T. annulata</i>   | FN-----IIFVIHCNFAYSISY-----NNK--FINN---                       | 43  |
| <i>T. gondii</i>     | HRGVPCASLLPHRCGFCPSSSF-----LNSARFCPVIGE                       | 214 |
| <i>E. tenella</i>    | -----SALFHQCLEVSDSAI-----LS-----                              | 29  |
| <i>P. falciparum</i> | TQ-----LYDKKIKI-----K-SFINNY----                              | 85  |
| <i>B. microti</i>    | -----MGT-----G-----                                           | 4   |
| <i>T. annulata</i>   | -----I-----EI-----LNKRNNISKNNLLYPYLFYIY-----                  | 67  |
| <i>T. gondii</i>     | DTAVRGVLAGDGVWVSHV--SGSAARCDAGRPRQEKAGVAGRKRPHTAFFISINFAPCG   | 272 |
| <i>E. tenella</i>    | -----CCHVQPARVWQPRRPLQLQVKICRTGRPLGG-----SLMPRVS-FLLHPR-ANL   | 76  |
| <i>P. falciparum</i> | -----LVSCRKKKYIYNNVDDKSNIGT-----                              | 107 |
| <i>B. microti</i>    | -HRTICGCFVPANGHVRVAAT-----                                    | 24  |
| <i>T. annulata</i>   | -NRIYNKCKKN-----                                              | 77  |
| <i>T. gondii</i>     | ASTSSRDCFANSA-----EDRRG-APVGPPLSPSLRSLSRSSLCSLS               | 313 |
| <i>E. tenella</i>    | LTRTIVGCFSRPLGPFPCPSIDHKCDRQLYLKQVEAG-RPPEPPSAAS----QTADECASP | 131 |
| <i>P. falciparum</i> | -FNLYHNIIRDNNNNNNNDNNNNLKKRDDVLFPLCNKNIINDVQKIYDEVNNIKDKEQKI  | 166 |
| <i>B. microti</i>    | -----                                                         | 24  |
| <i>T. annulata</i>   | -----                                                         | 77  |
| <i>T. gondii</i>     | RSSLRSSARDPFSPATPLASSGSLPPRMRELLSELR--RQKDLHAVFE-----         | 359 |
| <i>E. tenella</i>    | DGSVM-----GS-----AFFEVAR--RWLTLCRVFRGA---PTAESRI              | 164 |
| <i>P. falciparum</i> | NYLMEQ-----                                                   | 172 |
| <i>B. microti</i>    | -----                                                         | 24  |
| <i>T. annulata</i>   | -----                                                         | 77  |
| <i>T. gondii</i>     | -----KLVSFASSVPLYPARDASAVSSRASTASPPSPRPVPSASLSPAPP            | 405 |
| <i>E. tenella</i>    | KILMHLAFQETNGSDFLSFTGKRPLTRIKQS-----AHGPSAS                   | 202 |
| <i>P. falciparum</i> | -----CSSLCKENYFPILNLNKAYRNK--RID-EFNKGNKNFYINEVGKNIWYKYV      | 221 |
| <i>B. microti</i>    | NKGTNEELNVGNHDAHIQOTA--F---ARELNARLVERLSK-----KFSSSEHLTEV     | 72  |
| <i>T. annulata</i>   | -----EPFRANSDTKHTLTST--LQHNYNDLNEKIKHRIESESSCLLEDNLNKSDFVQEL  | 130 |
| <i>T. gondii</i>     | PKATE---TSGRADDRLLPQAQLLQPPREASEEAD-----EEGDSPEAWERV          | 450 |
| <i>E. tenella</i>    | SEALESGSAAGVDEASVC-----PST-----SDLVLSDIWRPV                   | 235 |
| <i>P. falciparum</i> | NRCDEILFMAIDIQIDEDEQRNNSIKDVHVDVHDDNIKTCTLIKDDKHFEKYKD-----   | 274 |
| <i>B. microti</i>    | T-----RVASEI-FPNPKDEH-----FHL-----F                           | 92  |
| <i>T. annulata</i>   | A-----RLGRSI-YSNIPTPTL-----FKS-----VPNGINLLKSF                | 160 |
| <i>T. gondii</i>     | AGCAALVRIIRVCLRRVLSPKREG-----ESRACSVFREADVREEPQQ-GALASL       | 498 |
| <i>E. tenella</i>    | TGCAAVAAVKVSLHYVVRPQORS-----LAA-----                          | 261 |

|                      |                                                               |      |
|----------------------|---------------------------------------------------------------|------|
| <i>P. falciparum</i> | -----IHNDNILKNILPLDKKIDSIKNMLNHKYMKKKKCIITIDAY                | 315  |
| <i>B. microti</i>    | --NLSQFSPE-----FADQFGAKP-YAKLQDCITPI-YLAAIRYWHEGVERLAIDGT     | 140  |
| <i>T. annulata</i>   | --NSNDFNSLGCNGRDIYFLVKSPVPVD-YKLLDDCSSSI-YISIH---LDKDKKIYLDGI | 213  |
| <i>T. gondii</i>     | SVAASSSSGASCHDVE-----GAKKERRELRRE-DRD-GEDERR---RWELRVDLRGW    | 546  |
| <i>E. tenella</i>    | --SITSNSRLCCVAA-----KQGAKVHVHGE                               | 285  |
| <i>P. falciparum</i> | SNNLILYCFLYLILKHINKMYLYSFMNIQIKEITAKIKEL-----                 | 355  |
| <i>B. microti</i>    | SNSLVGKTYLALMLSALHGNPLDELASIFE-----SKGRTFEQLSRF               | 182  |
| <i>T. annulata</i>   | SDSFVFKGIISLLIS-----                                          | 228  |
| <i>T. gondii</i>     | SDSLVVRWLAAILVVGLNNAAPDTVLAALSTDD---ILREAGLMPSTPSGGKGHKDTVKE  | 603  |
| <i>E. tenella</i>    | SDSLVVGGLLQLLSRSLSGSAPCGVFALSALGSTKLLQFSSLLNLLPDSRVRGFRTAMHI  | 345  |
| <i>P. falciparum</i> | -----                                                         | 355  |
| <i>B. microti</i>    | TDGISQRICQ-----ELFR-----                                      | 196  |
| <i>T. annulata</i>   | -----                                                         | 228  |
| <i>T. gondii</i>     | TQGEPEKQTEEGEDGHREAEAEAEAEAEAEAEAEAEAEAEAEAEAEAEAEAEAEAEK     | 663  |
| <i>E. tenella</i>    | LMGSTQDLLQR-----YFCNEVLP--PAELPQ---NAHGEQGTAP--NKQDITTG---    | 389  |
| <i>P. falciparum</i> | -----FDLHFNVHHIIDIYIHEYIYN-----                               | 375  |
| <i>B. microti</i>    | -----                                                         | 196  |
| <i>T. annulata</i>   | -----                                                         | 228  |
| <i>T. gondii</i>     | LREEETRKCREEEKRRLLVVPQGLEFMLRSIQRQVREQLSRLAEEEKNGGAPDGKVRKSKT | 723  |
| <i>E. tenella</i>    | -----RTQAKVPGTSL-----RP----                                   | 403  |
| <i>P. falciparum</i> | -----FLMSYHIK-----RKKNKSKNMKEKDIKNVFANN-----IIISD             | 409  |
| <i>B. microti</i>    | -----LIGFNTNKA--AGYDD-----SEADMKNKDFQFKRLVPK-----PAL--        | 232  |
| <i>T. annulata</i>   | -----LIGWKNSTE--VEVDN-----V-----KKHKF-FKKVIDH-----GIISE       | 260  |
| <i>T. gondii</i>     | DRDASRDLTGETRTRTDENGVSFHRCRSDAET-EADSHHVSSSLSSSLPPSQPHLSS     | 782  |
| <i>E. tenella</i>    | PRPANDALSgy-----RQE-----PHGDQWGNPIPOHALPSI-----               | 435  |
| <i>P. falciparum</i> | EENKHISKE-----SSDMYKKKTTITTTTTHKTKKNTMKLFTYPIAHMLSG           | 456  |
| <i>B. microti</i>    | -----RNSLYRRSY---GFEVHDLYRLRSKSSSPNKVAMLI SG                  | 267  |
| <i>T. annulata</i>   | NSLNSIL-----NHIKNELKKQDN---PTKGPKRTSMFQSPRSKRVAVLVSG          | 305  |
| <i>T. gondii</i>     | PSSSSLSSSSSPSSSSSSSSSAAPDLFASTT---ETCEEKRELRRSAASSPPQVAVLLSG  | 839  |
| <i>E. tenella</i>    | PRSKETAK-----L-----AAKSRVSLPLSDGAGAEVHVLVSG                   | 468  |
| <i>P. falciparum</i> | GVDSLMAHLHLLERKKFYVDNYFFNFT-----NADC-                         | 486  |
| <i>B. microti</i>    | GVDSSVALWMLKSQGYNVHAFYLLKAFG-----SDSPGCT                      | 301  |
| <i>T. annulata</i>   | GVDSSLALWIMKSRGFDVQAFHLKVNDL-----SNGPGLC-                     | 340  |
| <i>T. gondii</i>     | GVDSSVSLCLLQQRGFAPQAFFIKVWLPELLLSRHLNRLLD-----SGLAPAAAGCG     | 893  |
| <i>E. tenella</i>    | GVDSAVSLLLMREWGFPRPKPIFLKVWAPEAAQMKEQLQGRYQQEKLDIAAASATAAAACP | 528  |
| <i>P. falciparum</i> | SKNDIKYVKDICKNNKRNLFIIININDEYFDEVLPMLFFYADGKVPNPDIMCNQKIKYNF  | 546  |
| <i>B. microti</i>    | VAEDIRYATDCCNVLGVPLHILPVEDVYNRAVMQYMVEGYRAGNTPNPDVICNREVKFGY  | 361  |
| <i>T. annulata</i>   | SSNDISYAMEVCNILRVTLHVLFPFSQVYDKHILSDVLDYRKGQEVNPDILCNSRIKFGE  | 400  |
| <i>T. gondii</i>     | WERDLLFADQVCRQARVPLEVLPLQEAAYWEGVVQMLDEARQGLTPNPDWVQNQVVKFGA  | 953  |
| <i>E. tenella</i>    | WREDAKAAAAGVAAAAGLSLEVVMQQQYWDRVLSGFLEGARAGLTLNPDWVSCNSSVKFGA | 588  |
| <i>P. falciparum</i> | FLKVIKSIYKQKWNRTKSK-----LCNDFISTGHYAMIRTND                    | 585  |
| <i>B. microti</i>    | FLNLATS-E---FGF-----DMVASGHYARINPQY                           | 387  |
| <i>T. annulata</i>   | FLKMA-T-D---WGF-----DYVATGHYATLCDDF                           | 425  |
| <i>T. gondii</i>     | FLDLLDGRE---TRESARRIAGESEGENEKEEADMPFLRNSSRWGTGAVASGHYARVVPAA | 1010 |
| <i>E. tenella</i>    | FAETLDAVD---YR-----IASGHYARILI--                              | 610  |
| <i>P. falciparum</i> | KNNPNNIFNNLFIKKKKKKIKNIKNKKNIKNKNNIKNKNNNNNIYTINIYNLHNDNIKT   | 645  |
| <i>B. microti</i>    | FIP PQSNG-----                                                | 396  |
| <i>T. annulata</i>   | FTKEQIKSP-----S-----YL-----DGC-----                           | 440  |
| <i>T. gondii</i>     | ETSRRSEEG-----E-----DT-----EDRDEDG-----EEDRGDK                | 1036 |
| <i>E. tenella</i>    | -----                                                         | 610  |

|                      |                                                                 |      |
|----------------------|-----------------------------------------------------------------|------|
| <i>P. falciparum</i> | NYKKNNKYFYKLLVSNDDKKKDQTFLLSSFNHIQLSKFIFPLSLYTKKDVKKYMNENNINN   | 705  |
| <i>B. microti</i>    | -TQSSFVRFNELETSYYVNKDQTYFLSRLSSAQLGKMICPLGVHKKKMRALAYINGLGT     | 455  |
| <i>T. annulata</i>   | TSINGYYRIKRLCLSTDTVKDQTYFLSRLNQNQMSRLIFPIGNILKTQVRDFAKTVGLPT    | 500  |
| <i>T. gondii</i>     | ERGSEERTRFLFRGKDRRKDQSYFLSGLSQRQLRRLVTPVGDMEKVEVRLAAALDLPT      | 1096 |
| <i>E. tenella</i>    | -----DEGCPRLLRGVDLTKDQSYFLSGLSSQLSRLLPVVGALLKTQVRKIAVSWGLPS     | 665  |
|                      | *                                                               |      |
| <i>P. falciparum</i> | YNHKETKGLCLFGNIDMQTLLHKYFVNTEKDDIKNKQNEDNIFKENNINLNNNNFNQNEK    | 765  |
| <i>B. microti</i>    | QARDDSMGVCFGLRDLRQFLKAHLGETPGQIIDYKS-KQVIGQHTGLYNY-----TIGQR    | 510  |
| <i>T. annulata</i>   | YNKKDSFGLCFLEDLDLSEYLTKTLLGESRGPIVEYET-NKVI GEHNGLYNF-----TIGQK | 555  |
| <i>T. gondii</i>     | ARRQDSQGLCFGLNLSLSFFFRHFLGSSTGPVLHFPS-CLALGSHDGLWNF-----TVGQR   | 1151 |
| <i>E. tenella</i>    | SQRPDSQGLCFGLPLPVSQFLMHLGEEEGPVIHFPT-GVSI GRHKGLWGF-----TVGQQ   | 720  |
| <i>P. falciparum</i> | KKKKEKLLVDITTTSSHLKFFRE-TFIP-----                               | 793  |
| <i>B. microti</i>    | Q---GLGVSIDHGG-EE-----                                          | 523  |
| <i>T. annulata</i>   | K---TINNYLNPKHVGN-----                                          | 569  |
| <i>T. gondii</i>     | K---GVTPCIDVARVRR-LSSLPDSSLTPHAASVDSEGSEEQTARAGDSRRRQARAPPGK    | 1207 |
| <i>E. tenella</i>    | K---GVVPLLDPRLCRR-CHGASG-----                                   | 740  |
| <i>P. falciparum</i> | -----KMNLYKNYLINLDDQTILDINS                                     | 817  |
| <i>B. microti</i>    | -----                                                           | 523  |
| <i>T. annulata</i>   | -----                                                           | 569  |
| <i>T. gondii</i>     | PTKASATGQGRQAADDEERLLEAKCHRDGDDSCLSANHTVRGRLECTDNADRP--DGR      | 1265 |
| <i>E. tenella</i>    | -----                                                           | 740  |
| <i>P. falciparum</i> | IHLAIG-----QHK-----NVTNYLHNLYNKMINI                             | 844  |
| <i>B. microti</i>    | -----                                                           | 523  |
| <i>T. annulata</i>   | -----                                                           | 569  |
| <i>T. gondii</i>     | VPVLSEGNEAPSSSSSCSSSAEADGQEEGGDRQSRLSSSSFAACLSGSPQNLFE----PA    | 1321 |
| <i>E. tenella</i>    | -----                                                           | 740  |
| <i>P. falciparum</i> | NGYKKKHVKNVISSFQWIVVYKKIKRDM-----ST-                            | 874  |
| <i>B. microti</i>    | -----GGWFVVSKDAAANTLYVTKEYNSRHFTGRSCIRRAFSLAHRVWNN-             | 568  |
| <i>T. annulata</i>   | -----TPKYVVKKDIYKNTLYVSASYNEDFFTNPGRIRSSFKVRDFFWNT-             | 614  |
| <i>T. gondii</i>     | NPFSRTGLGAASLAGRWVAAKHPPSNALFVVSEKEMKAAAA---VAES-----VGYSLD     | 1373 |
| <i>E. tenella</i>    | -----GPPKLSGPWSVVGKLPANALFVVSKEEEAAAED---RLRALATEPGNYSEP        | 789  |
| <i>P. falciparum</i> | -----NLIHNFYILTKNYDQD-LFTHIRTKCKLHNIKWIEGKLPACIKKQFKKYNKINK-    | 927  |
| <i>B. microti</i>    | -----PILLNSHGINEAD---YI-----KA                                  | 585  |
| <i>T. annulata</i>   | -----PDYKDLINKVQSEVSD-NFKFK-----VKLRHTPNYNYCNINFKGDEATDLQ       | 660  |
| <i>T. gondii</i>     | VLAAGPGVRT-LGDSQTYLLALLTLQKFLRVDNIQWISHPPCAACNAEEQPVS-----      | 1427 |
| <i>E. tenella</i>    | L-G-APLLRAAANGDKAAALALKLRQLRTCLRVDNIRWFHGKAPAGFDASATLQP-GCLR    | 846  |
| <i>P. falciparum</i> | -----KKKKINNNNKYKTNETFHVYNNIQESGKKKKKKVK--NIPHDE                | 970  |
| <i>B. microti</i>    | EWEPPI TRRDI-KTMQDLTLDRNVASTE---KLFL---K-----VRNGTVLYEA         | 627  |
| <i>T. annulata</i>   | KWLPTTYELAA-ATIASV--DNSKCSIKM--IQLILT-FCT-----IEDVGFHTA         | 705  |
| <i>T. gondii</i>     | -RDPSFLGTLGSRDPRARLRGDEKSLETADEF AFLR-WALEGSRDKRPRLYDVQVRHAA    | 1485 |
| <i>E. tenella</i>    | EEGPTL-AAVAASAVAAAKT-NTALPMERP-AESFL-----TG-SSKGGAGFVVQVRHSA    | 897  |
| <i>P. falciparum</i> | KTIFVKIRNS-----EQIKKAK-----IKFSLSN                              | 994  |
| <i>B. microti</i>    | ELK-----LSPPI---RKGQGV                                          | 642  |
| <i>T. annulata</i>   | DSKATTIAL---F-----FIFGSNK---DEKDGT                              | 729  |
| <i>T. gondii</i>     | GTACAAIHRRVRLCLFPPERRSPSFLSPSAVSEESGRRKESRAPFGPSRVETSAGSSGA     | 1545 |
| <i>E. tenella</i>    | GFHGVAKHNFKVLCVSRGH-----SGNSSPI                                 | 923  |
| <i>P. falciparum</i> | NTAYLKVKQKDTGFSPGQIITLYFPFIIKKNKVITYITNLNKYNNLINTNKNTIYYHCLG    | 1054 |
| <i>B. microti</i>    | QHGWA VLD RSDPGLATGQYAALYRGN-----ICIG                           | 672  |
| <i>T. annulata</i>   | IELEDIVHEPAPSEHGSKKSPSELHI-----YEIG                             | 759  |
| <i>T. gondii</i>     | WTAWIELAEPDEGLAPGQIAAIYEGE-----ECLG                             | 1575 |
| <i>E. tenella</i>    | EEAELLLEEPDVGLAPGQVAIFYRDD-----ECIG                             | 953  |

|                      |                                                               |      |
|----------------------|---------------------------------------------------------------|------|
| <i>P. falciparum</i> | SATISNQFLDYNLYQH IKN-----IHQINDLNMS---K---                    | 1084 |
| <i>B. microti</i>    | SGIIYQSF-----                                                 | 680  |
| <i>T. annulata</i>   | KPIDYLDWKQHKRTNSSQSGRNGTHGKTHTEKRRNSDPTKR SKVHKPQRITSELEQKTKP | 819  |
| <i>T. gondii</i>     | AGRISARQGQMAVEAAL--RSAGLN-----                                | 1598 |
| <i>E. tenella</i>    | SGRISALQGSFALKSII--DRLG-----                                  | 974  |
|                      |                                                               |      |
| <i>P. falciparum</i> | -----                                                         | 1084 |
| <i>B. microti</i>    | -----                                                         | 680  |
| <i>T. annulata</i>   | NSPQQTTT KQQTNTKEQNTNKQQSSVEQKTKADQSGPITRPFISPSVLKPSEKAERVFSS | 879  |
| <i>T. gondii</i>     | -----                                                         | 1598 |
| <i>E. tenella</i>    | -----                                                         | 974  |
|                      |                                                               |      |
| <i>P. falciparum</i> | -----                                                         | 1084 |
| <i>B. microti</i>    | -----                                                         | 680  |
| <i>T. annulata</i>   | NEKPAVQQRLFKPRENKYQKRTERYDTDMDFEKIFNPVHENAKDDEPGSYMPFESIYDLS  | 939  |
| <i>T. gondii</i>     | -----                                                         | 1598 |
| <i>E. tenella</i>    | -----                                                         | 974  |
|                      |                                                               |      |
| <i>P. falciparum</i> | -----                                                         | 1084 |
| <i>B. microti</i>    | -----                                                         | 680  |
| <i>T. annulata</i>   | LDKCRLNKAFFPKGKPAGHKFECIDL DVIRVSKDFKNISLVNANVIHPKSNTHKICKISF | 999  |
| <i>T. gondii</i>     | -----                                                         | 1598 |
| <i>E. tenella</i>    | -----                                                         | 974  |
|                      |                                                               |      |
| <i>P. falciparum</i> | -----                                                         | 1084 |
| <i>B. microti</i>    | -----                                                         | 680  |
| <i>T. annulata</i>   | DNKVLVDKVVDSMEFTAVVLEHVRSISILSVISTNPNMERSAIQFVITGKDKINVMNDYV  | 1059 |
| <i>T. gondii</i>     | -----                                                         | 1598 |
| <i>E. tenella</i>    | -----                                                         | 974  |
|                      |                                                               |      |
| <i>P. falciparum</i> | -----                                                         | 1084 |
| <i>B. microti</i>    | -----                                                         | 680  |
| <i>T. annulata</i>   | SVMSTILKSEL                                                   | 1070 |
| <i>T. gondii</i>     | -----                                                         | 1598 |
| <i>E. tenella</i>    | -----                                                         | 974  |

**Figure 3- figure supplement 2- source data 1. Multiple sequence alignment used for Figure 3- figure supplement 2.**
