# Supplementary material for: The Plasmodium falciparum apicoplast cysteine desulfurase provides sulfur for both iron-sulfur cluster assembly and tRNA modification
Source: eLife journal article supplement (doi:10.7554/elife.84491), 2023-05-11
Supplement: supp [file elife-84491-supp-v1.zip]

|           |             |                                                                                                                            |     |
|-----------|-------------|----------------------------------------------------------------------------------------------------------------------------|-----|
| <i>Pf</i> | <i>MnmA</i> | MLIF F F F F F F F F F F K Y I Y N I F I L T C F Y I T L S S Y Y F I I S F I F S T L M F F Y F C T F Y V I S L F F L Y I S | 60  |
| <i>Sy</i> | <i>MnmA</i> | -----                                                                                                                      | 0   |
| <i>Bs</i> | <i>MnmA</i> | -----                                                                                                                      | 0   |
| <i>Ec</i> | <i>MnmA</i> | -----                                                                                                                      | 0   |
| <i>At</i> | <i>MnmA</i> | -----                                                                                                                      | 0   |
| <i>Sc</i> | <i>Mtu1</i> | -----                                                                                                                      | 0   |
| <i>Pf</i> | <i>MnmA</i> | S F C K S I K V T Q L Y D K K I K I K S F I N N Y L V S C R K K K Y I Y N N V D D K S N I G T F N L Y H N I R D N N N N    | 120 |
| <i>Sy</i> | <i>MnmA</i> | -----                                                                                                                      | 0   |
| <i>Bs</i> | <i>MnmA</i> | -----                                                                                                                      | 0   |
| <i>Ec</i> | <i>MnmA</i> | -----                                                                                                                      | 0   |
| <i>At</i> | <i>MnmA</i> | -----                                                                                                                      | 0   |
| <i>Sc</i> | <i>Mtu1</i> | -----                                                                                                                      | 0   |
| <i>Pf</i> | <i>MnmA</i> | N N N N D N N N N L K K R D D V L F P L C N K N I I N D V Q K I Y D E V N N I K D K E Q K I N Y L M E Q C S S L C K E N    | 180 |
| <i>Sy</i> | <i>MnmA</i> | -----                                                                                                                      | 0   |
| <i>Bs</i> | <i>MnmA</i> | -----                                                                                                                      | 0   |
| <i>Ec</i> | <i>MnmA</i> | -----                                                                                                                      | 0   |
| <i>At</i> | <i>MnmA</i> | -----                                                                                                                      | 0   |
| <i>Sc</i> | <i>Mtu1</i> | -----                                                                                                                      | 0   |
| <i>Pf</i> | <i>MnmA</i> | Y F P P I L N L N K A Y R N K R I D E F N K G N K N F Y I N E V G K N I W Y K Y V N R C D E I L F M A I D I Q I D E D E    | 240 |
| <i>Sy</i> | <i>MnmA</i> | -----                                                                                                                      | 0   |
| <i>Bs</i> | <i>MnmA</i> | -----                                                                                                                      | 0   |
| <i>Ec</i> | <i>MnmA</i> | -----                                                                                                                      | 0   |
| <i>At</i> | <i>MnmA</i> | -----                                                                                                                      | 0   |
| <i>Sc</i> | <i>Mtu1</i> | -----                                                                                                                      | 0   |
| <i>Pf</i> | <i>MnmA</i> | Q R N N S I K D V H D V H D D N I K T C T L I K D D K H F E K Y K D I H N D N I L K N I L P L D K K I D S I K N M L N H    | 300 |
| <i>Sy</i> | <i>MnmA</i> | -----                                                                                                                      | 0   |
| <i>Bs</i> | <i>MnmA</i> | -----                                                                                                                      | 0   |
| <i>Ec</i> | <i>MnmA</i> | -----                                                                                                                      | 0   |
| <i>At</i> | <i>MnmA</i> | -----                                                                                                                      | 0   |
| <i>Sc</i> | <i>Mtu1</i> | -----                                                                                                                      | 0   |
| <i>Pf</i> | <i>MnmA</i> | K Y M K K K K C I I T I D A Y S N N L I L Y C F L Y L I L K H I N K M Y L Y S F M N I Q I K E I T A K L K E L F D L H F    | 360 |
| <i>Sy</i> | <i>MnmA</i> | -----                                                                                                                      | 0   |
| <i>Bs</i> | <i>MnmA</i> | -----                                                                                                                      | 0   |
| <i>Ec</i> | <i>MnmA</i> | -----                                                                                                                      | 0   |
| <i>At</i> | <i>MnmA</i> | -----                                                                                                                      | 0   |
| <i>Sc</i> | <i>Mtu1</i> | -----                                                                                                                      | 0   |
| <i>Pf</i> | <i>MnmA</i> | N V H H I I D Y I H E Y I Y N F L M S Y H I K R K K N K S K N M K E K D I K N V F A N N I I I S D E E N K H I S K E S S    | 420 |
| <i>Sy</i> | <i>MnmA</i> | -----                                                                                                                      | 3   |
| <i>Bs</i> | <i>MnmA</i> | -----                                                                                                                      | 0   |
| <i>Ec</i> | <i>MnmA</i> | -----                                                                                                                      | 0   |
| <i>At</i> | <i>MnmA</i> | -----                                                                                                                      | 0   |
| <i>Sc</i> | <i>Mtu1</i> | -----                                                                                                                      | 14  |
| <i>Pf</i> | <i>MnmA</i> | D M Y K K K T T I T T T T T T K K K K N T M K L F T Y P R I A H M L S G G V D S L M A L H L L E R K K F Y V D N Y F F N    | 480 |
| <i>Sy</i> | <i>MnmA</i> | S P Y P L ----- V A P E I A G S P R P R I V A A L S G G V D S S T V A A I L H E Q Q Y A V E G V T L -                      | 51  |
| <i>Bs</i> | <i>MnmA</i> | ----- M E K R P E D T R V V V G M S G G V D S S V A A L L L K E Q Q Y D V I G I F M K                                      | 40  |
| <i>Ec</i> | <i>MnmA</i> | ----- M - S E T A K K V I V G M S G G V D S S V S A W L L Q Q Q Y Q V E G L F M K                                          | 38  |
| <i>At</i> | <i>MnmA</i> | ----- M - P E K P L R V A V L L S G G V D S S V A L R L L H A A G H S C T A F Y L K                                        | 38  |
| <i>Sc</i> | <i>Mtu1</i> | - M L A R Y L N L I G R R S A S P Y R P Q R L P A K F D N V I V A M S S G V D S S V A A A L F A G E F P N T R G V Y M Q    | 59  |

**Pf MnmA** -FTN-----A----DC-SKNDIKYVKDICKNNKRNLFIIININDEYFDEVLPVPM LFF 525  
**Sy MnmA** -WLMRG-----KGQC---CT--DGLVDAAAICEQLGIPHHIVDSRELFQANIVDYLVAG 99  
**Bs MnmA** NWDDTD-----ENGF---CTATEDYEDVIRVCNQIGIPYYAVNFEKQYYEKVFQYFLDE 91  
**Ec MnmA** NWEEDD-----GEEY---CTAAADLADAQAVCDKLGIELHTVNFAAEYWDNVFELFLAE 89  
**At MnmA** IWFQEG-----FENFWNQCPWEDDLKYAKHVCEQVDVPLEVVHLTDEYWERVVSYIEE 92  
**Sc Mtu1** NWSESQSLDDPGKE----PC-YERDWRDVNRVAKHLNIRVDKVNFEQDYWIDVFEPMLRG 114

**Pf MnmA** YADGKVPNPDIMCNQKIKYNFFLKVIKSIYKQKWNRYRTKSKLCNYDFISTGHYAMIRTND 585  
**Sy MnmA** YADGITPLPCSQCNKLVKFGPLLTARETL-----GISQIATGHYARVRFNS 146  
**Bs MnmA** YKAGRTPNPVDVLCNKEIKFKAFLEHA-LSL-----GADYLATGHYARVD--R 135  
**Ec MnmA** YKAGRTPNPDILCNKEIKFKAFLEFAAEDL-----GADYIATGHYVRR--D 134  
**At MnmA** YRCGRTPNPVDVLCNTRIKFGAFMDAI-SDM-----EYDYVGS GHYAKVVHPP 138  
**Sc Mtu1** YSEGSTPNPDIGCNKFKVFGKLRWLDEKYG-----TGNYWLVTGHYARVM--Q 161

**Pf MnmA** KNNPNNIFNNNLFIKKKKKKIKNIKNKKNIKNKNNIKNKNNNNNIYTYNIYNLHNDNIKT 645  
**Sy MnmA** E----- 147  
**Bs MnmA** S----- 136  
**Ec MnmA** V----- 135  
**At MnmA** AD----- 140  
**Sc Mtu1** EM----- 163

**Pf MnmA** NYKKNKYFYKLLVSNDDKKDQTFLLSSFNHIQLSKFIFPLSLYTKKDVKKYMENNINN 705  
**Sy MnmA** -----LGRYQLLRAVDRQKDQSYFLYDLSQEHLAHSLFPLGNYTKAQTRQIAARYGLVT 201  
**Bs MnmA** -----GGKVRMLRGIDENKDQTYFLNQLTEDTSLKVMFPIGELQKSRVREIAKEAELAT 190  
**Ec MnmA** -----DGKSRLRLGLSDNKDQSYFLYTLSEHQIAQSLFPVGELEKPOVRKIAEDLGLVT 189  
**At MnmA** ----QNDASSVLELSQDMVKDQTYFLSHLSQTQLKRLLFPLGCVKKDEVKRLATQFDLPN 196  
**Sc Mtu1** ----NGKGLFHLLRSIYRPKDQSYYSLSQINSTVLSLLLPIGHLTKPEVRDLAKYAGLPT 219

**Pf MnmA** YNHKETKGLCLFGN---IDMQTL LHKYFVNTEKDDIKNKQONEDNIFKENNILNLNNNFNQ 762  
**Sy MnmA** ANKPESQDLCLIET--YGSMRNF LDQHLGQRPGEIVDT-Q----- 238  
**Bs MnmA** ATKKDS TGICFIGE---RNFKTFLSQYLPAPGDMMTM-D----- 226  
**Ec MnmA** AKKDS TGICFIGE---RKFREFLGRYLPAPGKIITV-D----- 225  
**At MnmA** KDRKDSQGICFLGK---IKFSDFVCRHIGEMEGII LEAES----- 233  
**Sc Mtu1** AEKPDSQGICFVNNSQH GKFKNFLKHYLPSSPGDIITVDPQS----- 261

**Pf MnmA** NEKKKKKEKLLVDITTTSSHLKKFRETFFPKMNLHYKNYLINLDDQTI LDINSDIHL YA 822  
**Sy MnmA** -----GRVLGSHQGIHHT 252  
**Bs MnmA** -----GEVKGRHDGLMYYT 240  
**Ec MnmA** -----GDEIGE HQGLMYHT 239  
**At MnmA** -----GDFLGNHRGFWFYT 247  
**Sc Mtu1** -----GAKTTWGRHDGLWSYT 277

**Pf MnmA** IGQHKNVTNYLHNLYNKKMININGYKKKHVKNVISSFQWIVVYKIKRDMSTNLIHNFYIY 882  
**Sy MnmA** VGQRKGLGI-----ASS-----RPLYVVRIDAA-----MNRVV 280  
**Bs MnmA** IGQRHGLGI-----GGS-----GEPWFAVGKDL-----KNILY 269  
**Ec MnmA** LGQRKGLGI-----GGTKE-----GTEEPWYVVDKDVE-----NNILV 272  
**At MnmA** IGQRQGLRL-----PG-----GPWYVVEKDTK-----NNVVF 274  
**Sc Mtu1** IGQKVGISM-----PQADP-----NYQGTWV FVSEKLRD-----TNEIL 310

**Pf MnmA** LTKNYDQDLFTHIRTKCKLHN IKWIEGKLPACIKKQFKKYNKINKKKKKINNNNNKYKTN 942  
**Sy MnmA** VGEREEAT-----QAEAWVRQVNWVST-PAPD----- 306  
**Bs MnmA** VDQGFHNPLI--YSDKITATN ISWVRS DIMKG----- 299  
**Ec MnmA** VAQGHEHPRL--MSVGLIAQQLHWVDRE PFTG----- 302  
**At MnmA** VSRNYYSIDK--RRRIFRVGSLRWNSGKPSGK----- 304  
**Sc Mtu1** IVRGRDNPAL--YSDTMRIENFSSLG PREDTINA----- 342

|                |                                                                |      |
|----------------|----------------------------------------------------------------|------|
| <b>Pf MnmA</b> | ETFHVYNNIQESGKKKKKKKVKNI PHDEKTI FVKIRNS---EQIKKAKIKFSLSNNTAYL | 999  |
| <b>Sy MnmA</b> | -----E-----PLAVEVQVRYS---TPAVPATLIPESPERVK-L                   | 336  |
| <b>Bs MnmA</b> | -----E-----EISCTAKFRYS---QEDHKVTVRMTGEGEAE-V                   | 329  |
| <b>Ec MnmA</b> | -----TMRCTVKTRYR---QTDIPCTVKALDDRIE-V                          | 331  |
| <b>At MnmA</b> | -----VR-----ELRC--KVRHG---PGFYS CSFEMEGDGDVAVV                 | 334  |
| <b>Sc Mtu1</b> | -----FQN-----TGALITLQFRSLQVPVQIKSCKLNRSADNLDITI                | 378  |
|                |                                                                |      |
| <b>Pf MnmA</b> | KVKQKDTGFS PGQIITLYFPFI IKKNNKVTYITNLNKYNNLINTNKNTIYYHCLGSATIS | 1059 |
| <b>Sy MnmA</b> | QFAEPQFGVTPGQA AVWYHGD-----LLLGGGILE                           | 366  |
| <b>Bs MnmA</b> | IFDEQVRAVTPGQAVVFYDGE-----ECLGGGTID                            | 359  |
| <b>Ec MnmA</b> | IFDEPVA AVTPGQSAVFYNGE-----VCLGGGIIE                           | 361  |
| <b>At MnmA</b> | HLDEDDQGLAAGQFAAFYEGT-----TCIGSGVIL                            | 364  |
| <b>Sc Mtu1</b> | HLASKQRAITPGQSCCLYIDD-----RVLGSGPIS                            | 408  |
|                |                                                                |      |
| <b>Pf MnmA</b> | NQFLDYNLYQH IKNI--HQIND-----LNMSK-----                         | 1084 |
| <b>Sy MnmA</b> | RPSP-----                                                      | 370  |
| <b>Bs MnmA</b> | DVYKDGTKLWYV-----                                              | 371  |
| <b>Ec MnmA</b> | QRLPLPV-----                                                   | 368  |
| <b>At MnmA</b> | ESWDDQCFPVCAKALQLAALEDKTKLGKPVKIMTMPTMSSVEADTGEASAEQKLVNA      | 421  |
| <b>Sc Mtu1</b> | HVNNNDTHA-----                                                 | 417  |

**Figure 3- figure supplement 1- source data 1.** Multiple sequence alignment used for **Figure 3(A)** and **Figure 3- figure supplement 1**.
