# Supplementary material for: The Plasmodium falciparum apicoplast cysteine desulfurase provides sulfur for both iron-sulfur cluster assembly and tRNA modification
Source: eLife journal article supplement (doi:10.7554/elife.84491), 2023-05-11
Supplement: supp [file elife-84491-supp-v1.zip]

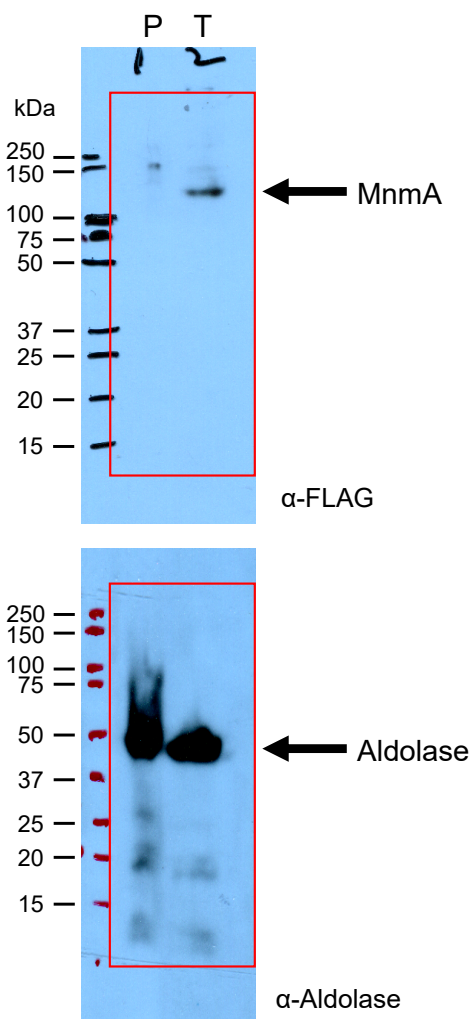

**Figure 3- figure supplement 4- source data 1.** Full immunoblot shown in **Figure 3- figure supplement 4(C)**. The red boxes correspond to the cropped images in **Figure 3- figure supplement 4(C)**.
