# Supplementary material for: The Plasmodium falciparum apicoplast cysteine desulfurase provides sulfur for both iron-sulfur cluster assembly and tRNA modification
Source: eLife journal article supplement (doi:10.7554/elife.84491), 2023-05-11
Supplement: supp [file elife-84491-supp-v1.zip]

|           |             |                                                                   |     |
|-----------|-------------|-------------------------------------------------------------------|-----|
| <i>Ec</i> | <i>SufE</i> | -----M-----                                                       | 1   |
| <i>Pf</i> | <i>SufE</i> | -----DEY-----                                                     | 103 |
| <i>Pf</i> | <i>MnmA</i> | -----INDVQKIYDEVNNIKDKEQKINYLMEO-----C-----SSLCK-----             | 178 |
| <i>Bm</i> | <i>MnmA</i> | -----                                                             | 84  |
| <i>Ta</i> | <i>MnmA</i> | -----LEDNLNKSDFVQELARL--GRSIY---SNIPTP                            | 144 |
| <i>Tg</i> | <i>MnmA</i> | LPPRMRELLSELRRQKDLHAVFEKLVSFASSVP--LYPARDASAVSSRASTASPPSPRP       | 394 |
| <i>Et</i> | <i>MnmA</i> | -----RRWLTLCRVFRGAPTAESRI---KILMHLAF-----                         | 172 |
| <i>Ec</i> | <i>SufE</i> | -----ALLPDKEKLLRNFL-----RCANWEEKYLYIIELG                          | 31  |
| <i>Pf</i> | <i>SufE</i> | -----NLTPKLLKKTVELFQS---MP-NSPYY--KSQQVILMG                       | 134 |
| <i>Pf</i> | <i>MnmA</i> | -----ENYFPPILNLNKAYRN--KRIDEFNKGNKNFYINEVG                        | 213 |
| <i>Bm</i> | <i>MnmA</i> | -----KDEHFHLFNLS                                                  | 95  |
| <i>Ta</i> | <i>MnmA</i> | ----TL-----FKSVPNGINLLKSFNS--NDFNSLGCNGRDYFLVKSP                  | 181 |
| <i>Tg</i> | <i>MnmA</i> | VPSASLSPAPPPKATETSGRADDRLLPPAQLLQQPRRE-----AS                     | 434 |
| <i>Et</i> | <i>MnmA</i> | -----QETNG-SDFLSFTGKRPLTRIKQSAHGPSASSEALESGSAAGVDEA               | 217 |
| <i>Ec</i> | <i>SufE</i> | QRLPELRD-EDRSPQNSIQGCQSQVWIVMRQN---AQGIIEIQGSDAA-IVKGLIYAVV       | 85  |
| <i>Pf</i> | <i>SufE</i> | KKISSMPD-KHKIRQNQVLGCQSVVYIYPKVEENEDKKKVIWVLGHSDDLTKGIVYIL        | 192 |
| <i>Pf</i> | <i>MnmA</i> | KN-----IWYKYVNRCEILFMAIDIQIDEDEQRNNS---IKDVHDVHDDNIKTC            | 260 |
| <i>Bm</i> | <i>MnmA</i> | QFSPEFADQFGAKPYAKLQDCITPIYLAAL-----                               | 125 |
| <i>Ta</i> | <i>MnmA</i> | VP-----VDYKLLDDCSSIYIISIHLDKDKKIYLDG---ISDSFVF-KGITI---           | 223 |
| <i>Tg</i> | <i>MnmA</i> | EEADEEGD--SPEAWERVAGCAALVRIRVCLRRVLSPKREG-----ESRAC               | 478 |
| <i>Et</i> | <i>MnmA</i> | SVCPSTSDLVLSDIWRPVTGCAAVAAVKVSLHYVVRPQQRSLAASI-----TSNSRLC        | 270 |
| <i>Ec</i> | <i>SufE</i> | -----FILDYDQM-----TPQDIVNFDVRPWFE-KMALTQHLTPSRSQ                  | 121 |
| <i>Pf</i> | <i>SufE</i> | -----TDGLSGY-----MPEDILKVN--PNFITLTGISEFLTMSRIN                   | 227 |
| <i>Pf</i> | <i>MnmA</i> | TLIKDDKHFEKY-----K--DIHNDNILKNIL---PLD-----KKID                   | 292 |
| <i>Bm</i> | <i>MnmA</i> | -----                                                             | 125 |
| <i>Ta</i> | <i>MnmA</i> | LLISLIGWKNS-----T--EVE-----                                       | 239 |
| <i>Tg</i> | <i>MnmA</i> | SVFREADVREEPQQGALASLSVAASSSSGASCHDVEGAKKER-----RELRRDRD           | 529 |
| <i>Et</i> | <i>MnmA</i> | CVA-----                                                          | 273 |
| <i>Ec</i> | <i>SufE</i> | GLEAMIRA---IRAKAA-----ALS-----                                    | 138 |
| <i>Pf</i> | <i>SufE</i> | GYLNIMNK---IKIFCT-----NILKNMDN-----                               | 249 |
| <i>Pf</i> | <i>MnmA</i> | SIKNMLNHKYMKKKCCIITIDAYSNNLILYCFLYLILKHINKMYLYSFMNIQIKE---IT      | 349 |
| <i>Bm</i> | <i>MnmA</i> | -----RYWHEGVERLAIDGTSNSLVGKTYLALMLSALHGNPLDELASIFESK-----         | 172 |
| <i>Ta</i> | <i>MnmA</i> | -VDNVKHKHFFKVIDH-----GIISENSLNSILNHIKN-----                       | 272 |
| <i>Tg</i> | <i>MnmA</i> | GEDE--RR---RWELRVDLRGWSDSLVRAWLAILVGLNNAAPDTVLLALSTDD---IL        | 580 |
| <i>Et</i> | <i>MnmA</i> | -----AKQGAKVHVHGESDSLVRVGGLLQLLSRSLSGSAPCGVFALSALGSTKLL           | 322 |
| <i>Ec</i> | <i>SufE</i> | -----                                                             | 138 |
| <i>Pf</i> | <i>SufE</i> | -----                                                             | 249 |
| <i>Pf</i> | <i>MnmA</i> | AKLKE-----                                                        | 354 |
| <i>Bm</i> | <i>MnmA</i> | -----GRTFEQLSRFTDGISQRICQELFRLIGFNTN-----KAAGYDDSE--              | 212 |
| <i>Ta</i> | <i>MnmA</i> | -----                                                             | 272 |
| <i>Tg</i> | <i>MnmA</i> | REAGLMPSSSTPSGGKGHKDTVKETQGEPEKQTE-----EGEDGH-----REAEAEAEAEAE    | 630 |
| <i>Et</i> | <i>MnmA</i> | QFSSLLNLLPDSRVRGFRRTAMHILMGSTQDLLQRYFCNEVLPPPAPLQNAHGEQGT-AP      | 381 |
| <i>Ec</i> | <i>SufE</i> | -----                                                             | 138 |
| <i>Pf</i> | <i>SufE</i> | -----                                                             | 249 |
| <i>Pf</i> | <i>MnmA</i> | -----LFDLHFNV                                                     | 362 |
| <i>Bm</i> | <i>MnmA</i> | --ADMD-----KNDKFQFKRLVPKPAL-----RN-----                           | 234 |
| <i>Ta</i> | <i>MnmA</i> | -----                                                             | 272 |
| <i>Tg</i> | <i>MnmA</i> | EEAEAEAEAEAEAEKEREKSGSKRESEEEERLQEGEERLREEETRKCREEEKRRLVVPQGLEFML | 690 |
| <i>Et</i> | <i>MnmA</i> | NKQDITTGRTQAKVPGTSLRPPRPAN-DALSGYRQEPHGD-----QWGNPIPQH---AL       | 432 |

|                |                     |     |
|----------------|---------------------|-----|
| <i>Ec</i> SufE | -----               | 138 |
| <i>Pf</i> SufE | -----               | 249 |
| <i>Pf</i> MnmA | HHI IDYIHEYIYNFLMSY | 380 |
| <i>Bm</i> MnmA | -----               | 234 |
| <i>Ta</i> MnmA | -----               | 272 |
| <i>Tg</i> MnmA | RSIQRQVREQLSRLAEEE  | 708 |
| <i>Et</i> MnmA | PSI PRS--KEIAKL---- | 444 |

**Figure 3- figure supplement 8- source data 3.** Multiple sequence alignment used for **Figure 3- figure supplement 8(H)**.
