# Supplementary material for: The Plasmodium falciparum apicoplast cysteine desulfurase provides sulfur for both iron-sulfur cluster assembly and tRNA modification
Source: eLife journal article supplement (doi:10.7554/elife.84491), 2023-05-11
Supplement: supp [file elife-84491-supp-v1.zip]

**A**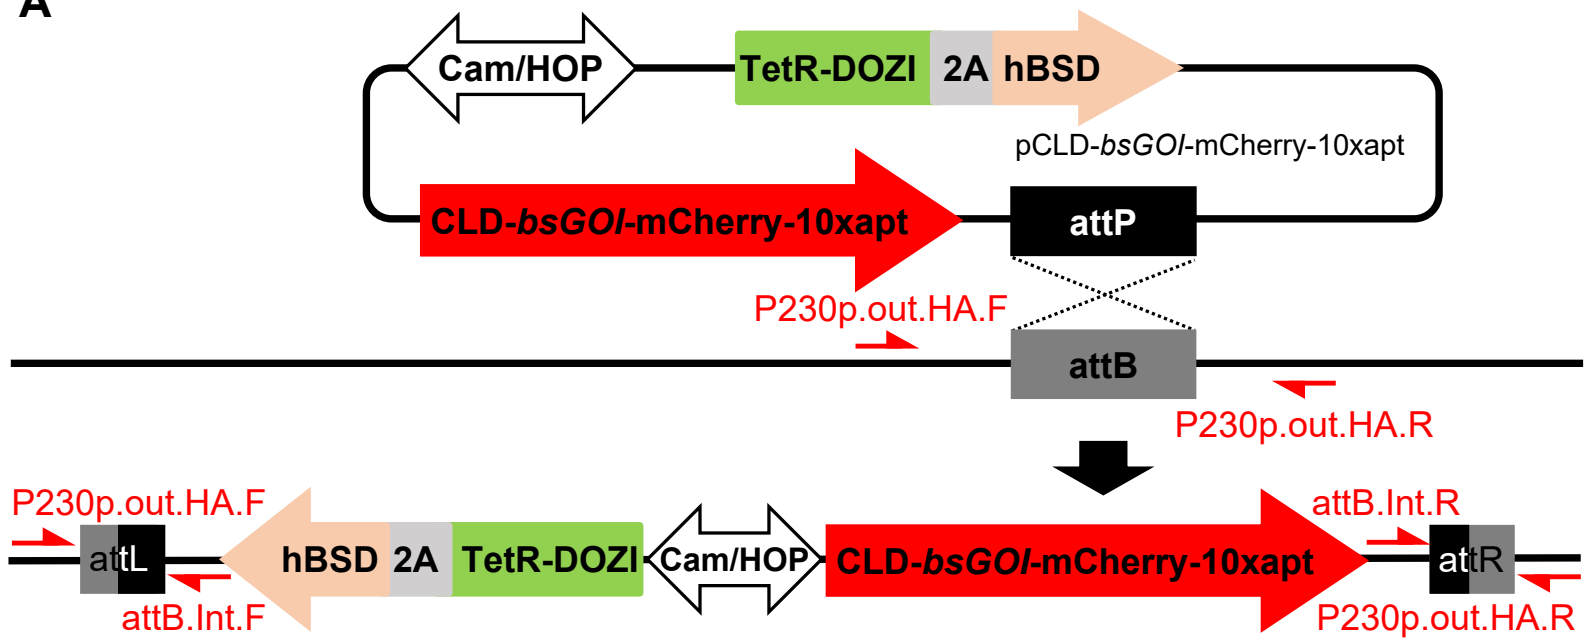**B**

| PCR reaction | Primer combination |                | Anticipated amplicon sizes (bp) | Parasite line                                                  |
|--------------|--------------------|----------------|---------------------------------|----------------------------------------------------------------|
|              | Forward            | Reverse        |                                 |                                                                |
| attL         | P230p.out.HA.F     | attB.Int.F     | 642                             | <i>bsmnmA</i> <sup>+</sup><br><i>/bsmnmA-yrvO</i> <sup>+</sup> |
| attR         | attB.Int.R         | P230p.out.HA.R | 732                             |                                                                |
| attB         | P230p.out.HA.F     | P230p.out.HA.R | -                               |                                                                |
| attL         | P230p.out.HA.F     | attB.Int.F     | -                               | PfMev <sup>attB</sup><br>(parental)                            |
| attR         | attB.Int.R         | P230p.out.HA.R | -                               |                                                                |
| attB         | P230p.out.HA.F     | P230p.out.HA.R | 1229                            |                                                                |
