# Supplementary material for: The Plasmodium falciparum apicoplast cysteine desulfurase provides sulfur for both iron-sulfur cluster assembly and tRNA modification
Source: eLife journal article supplement (doi:10.7554/elife.84491), 2023-05-11
Supplement: supp [file elife-84491-supp-v1.zip]

**Figure 1(B), Top**

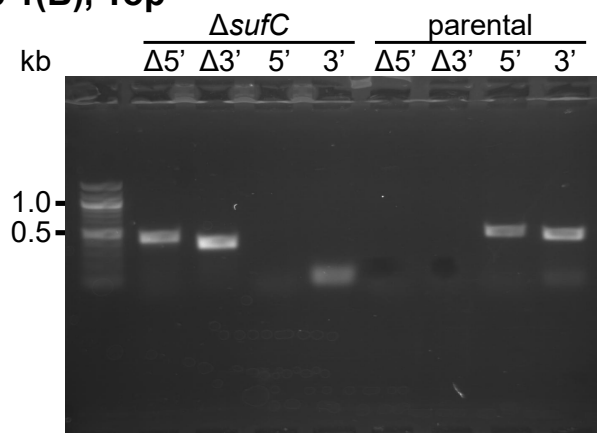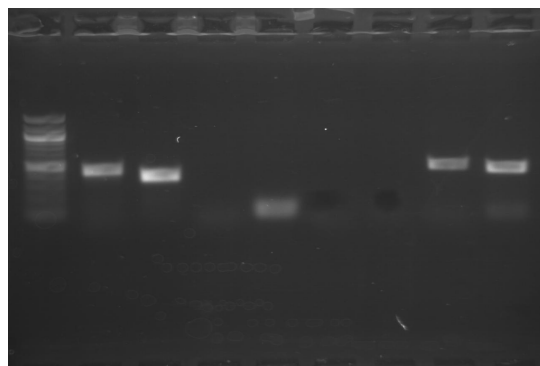

**Figure 1(B), Bottom**

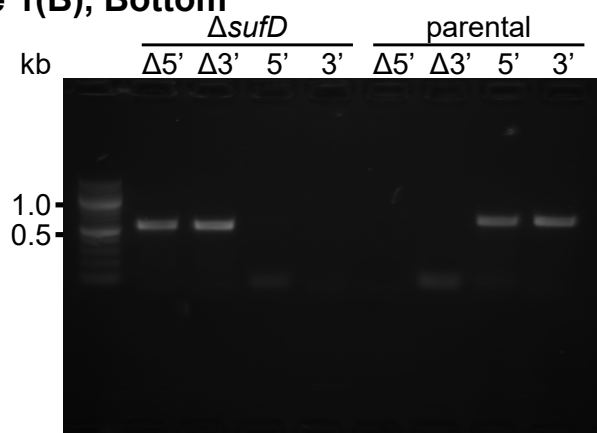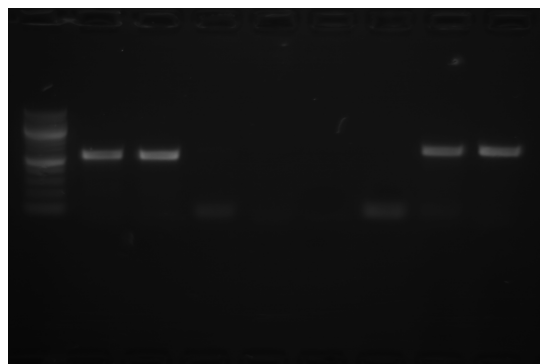

**Figure 1(C), Left**

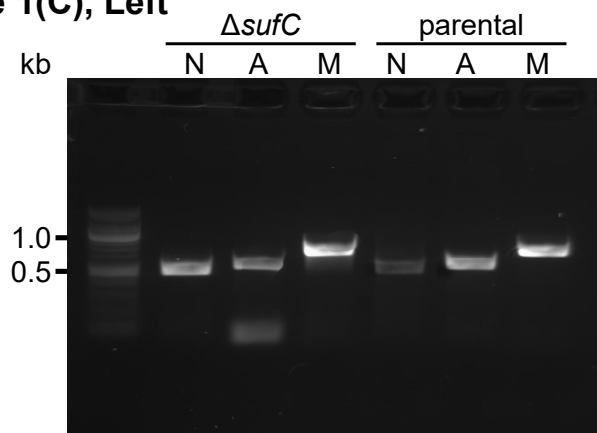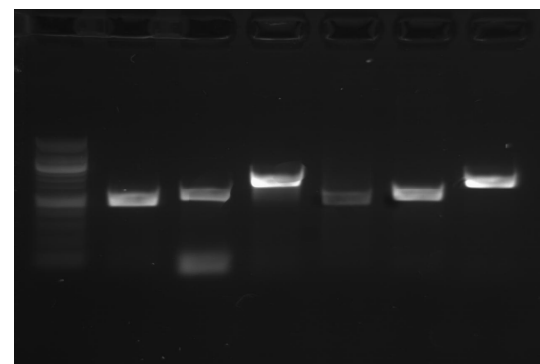

**Figure 1(C), Right**

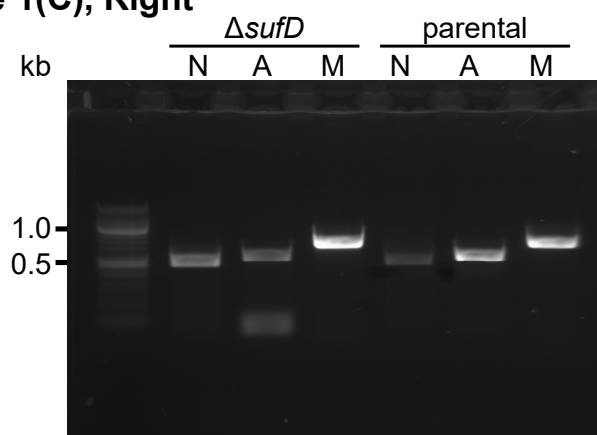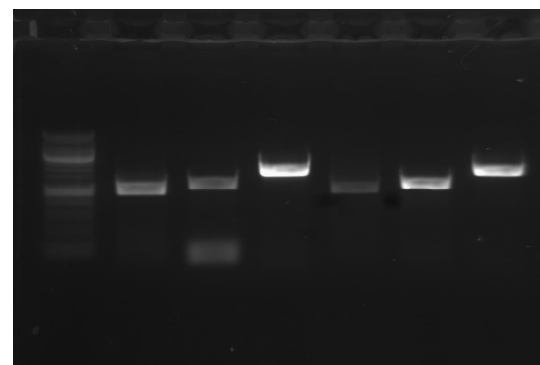

**Figure 1(F), Top**

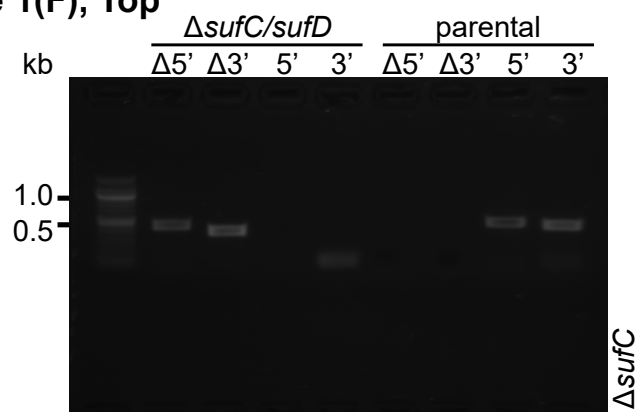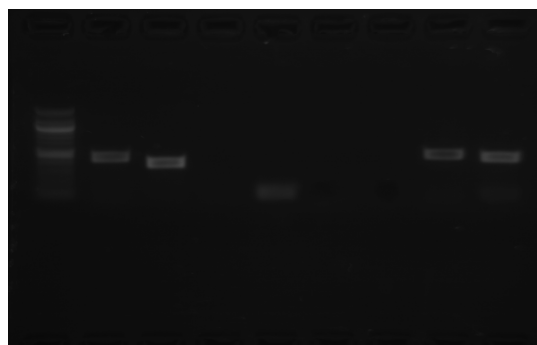

**Figure 1(F), Bottom**

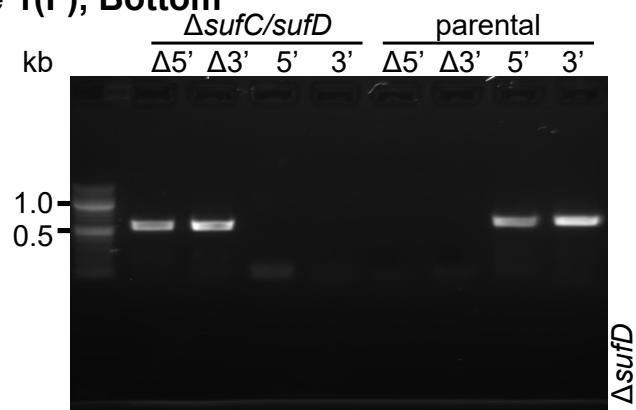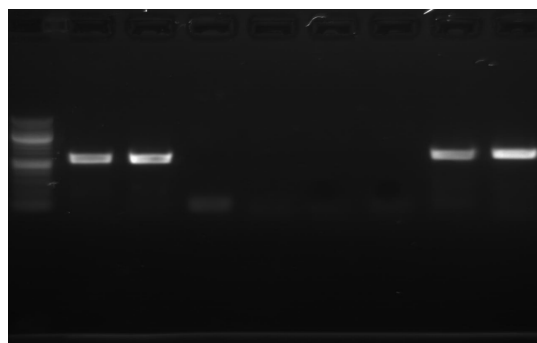

**Figure 1(G)**

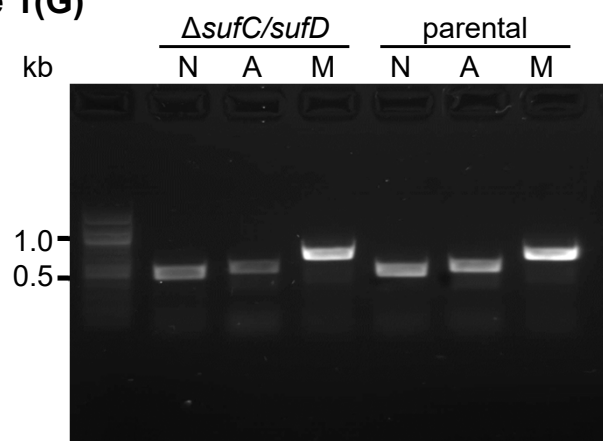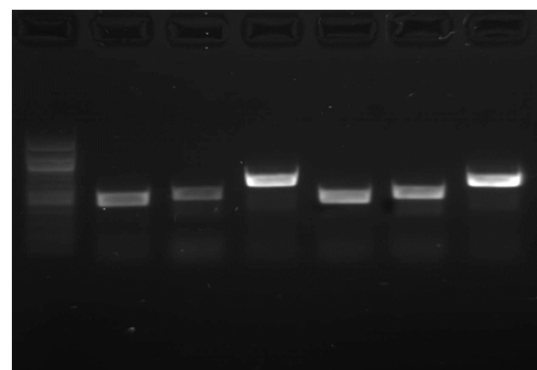

**Figure 1- source data 1.** Uncropped agarose gel images of PCR analyses presented in **Figures 1(B), 1(C), 1(F), and 1(G)**.
