# Supplementary material for: The Plasmodium falciparum apicoplast cysteine desulfurase provides sulfur for both iron-sulfur cluster assembly and tRNA modification
Source: eLife journal article supplement (doi:10.7554/elife.84491), 2023-05-11
Supplement: supp [file elife-84491-supp-v1.zip]

**Figure 2(A), Top**

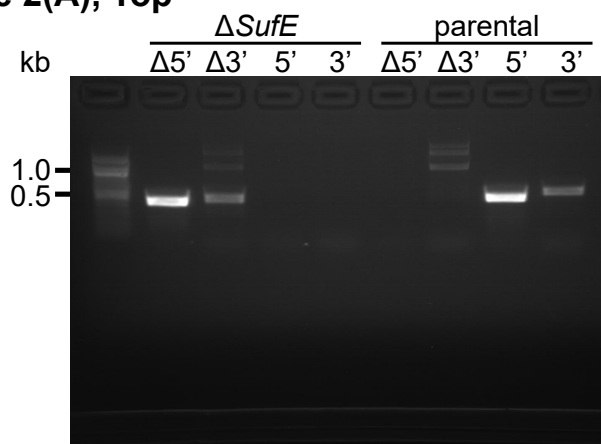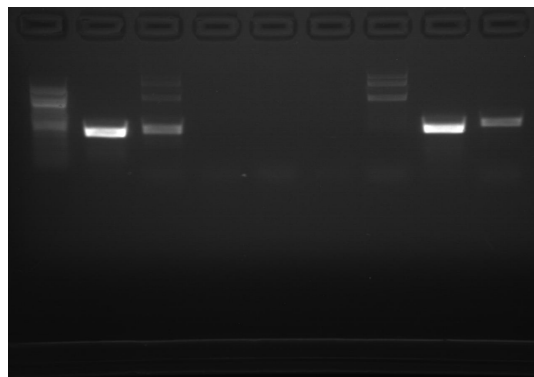

**Figure 2(A), Bottom**

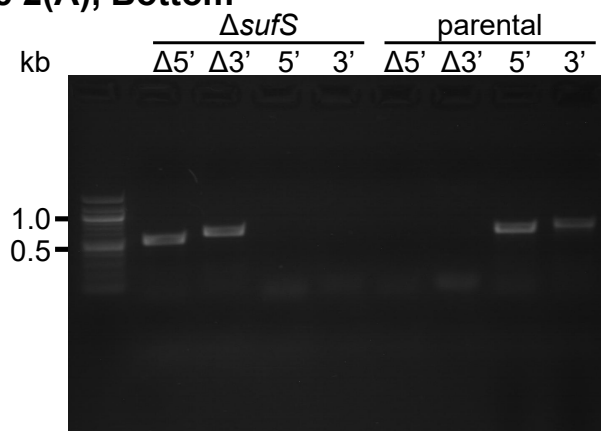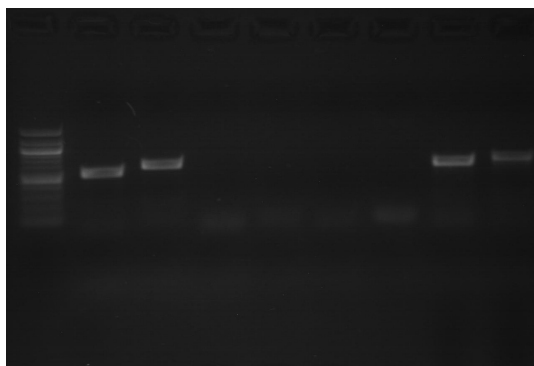

**Figure 2(B), Top**

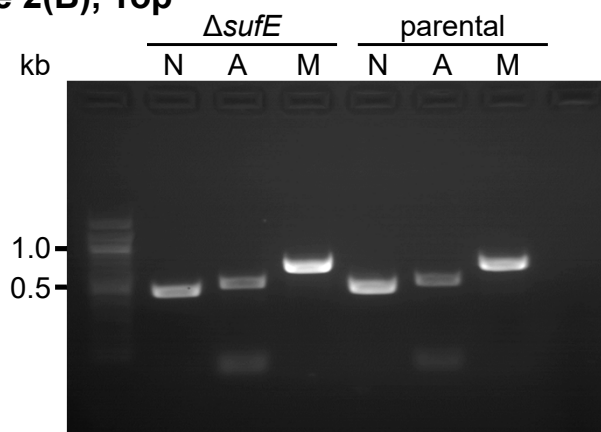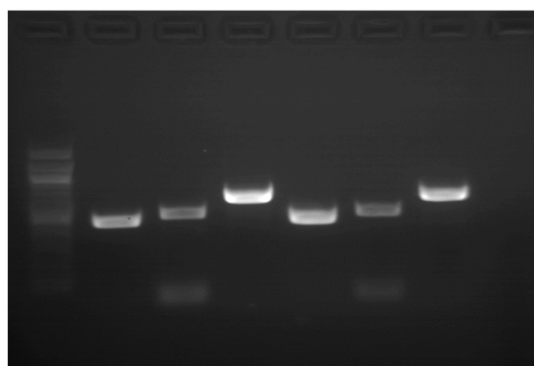

**Figure 2(B), Bottom**

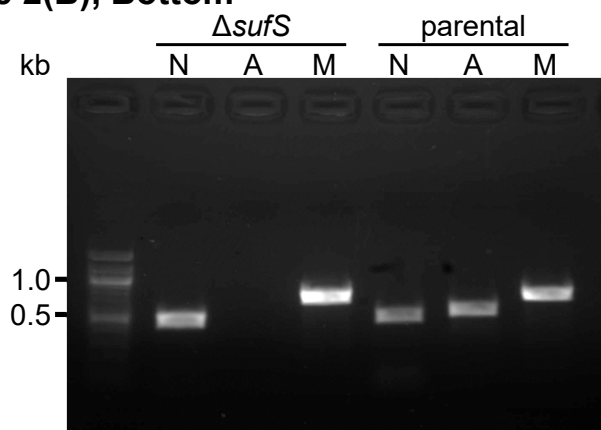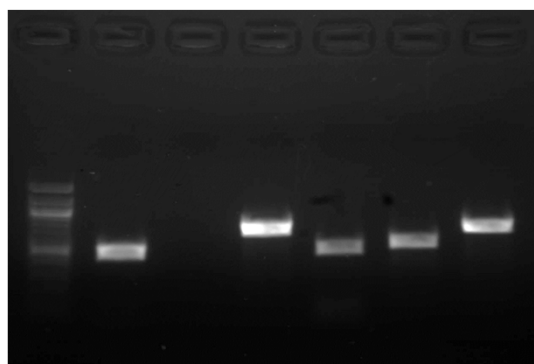

**Figure 2- source data 1.** Uncropped agarose gel images of PCR analyses presented in Figures 2(A) and 2(B).
