# Supplementary material for: The Plasmodium falciparum apicoplast cysteine desulfurase provides sulfur for both iron-sulfur cluster assembly and tRNA modification
Source: eLife journal article supplement (doi:10.7554/elife.84491), 2023-05-11
Supplement: supp [file elife-84491-supp-v1.zip]

ATGGAAAAACGGCCGGAGGATACAAGAGTCGTCGTCGGCATGTCCGGCGGAGTAGACTCATCTG  
TGGCGGCCCTGCTGTTAAAAGAACAGGGCTATGATGTAATCGGAATCTTTATGAAAACTGGGA  
TGATACGGACGAAAACGGTTTTTGCACGGCGACAGAGGATTATGAAGATGTGATCCGCGTCTGC  
AACCAAATCGGAATTCCGTATTATGCCGTAAACTTTGAAAAGCAATATTATGAGAAGGTATTTT  
AATACTTCCTTGATGAATATAAAGCAGGCAGAACACCAAACCCGGATGTATTGTGCAACAAAGA  
AATTAAATTCAAGGCCTTTTTTGGAGCATGCATTGTCACTTGGCGCCGACTATTTAGCGACTGGC  
CACTATGCAAGAGTAGACAGAAGCGGCGGAAAAGTCAGAATGCTGCGCGGCATTGATGAAAACA  
AGGATCAAACGTACTTCCTGAATCAGCTGACAGAAGATACGCTGAGCAAAGTCATGTTCCCGAT  
CGGCGAACTTCAAAAAAGCCGTGTGCGTGAAATTGCCAAAGAAGCAGAACTTGCAACAGCGACG  
AAAAAAGACAGTACAGGCATCTGCTTTATCGGCGAACGCAACTTCAAAACGTTTCTCAGCCAAT  
ATCTCCCTGCACAGCCGGGCGATATGATGACGATGGACGGCGAAGTAAAAGGCCGCCACGACGG  
GTTGATGTACTATACGATCGGACAGCGTCACGGCCTTGGCATCGGCGGAAGCGGCGAGCCGTGG  
TTTGCGGTAGGCCAAAGATCTTGAAAAGAACATCCTCTACGTAGATCAAGGGTTCATAACCCGC  
TTTTATATTCCGACAAAATCACAGCAACAAATATCAGCTGGGTACGTTCCGGATATCATGAAGGG  
CGAAGAGATTTCTTGCACGGCTAAATTCCGTTACCGCCAAGAGGATCATAAAGTAACAGTGCGC  
ATGACTGGCGAAGGTGAAGCGGAAGTCATCTTTGATGAACAAGTCCGCGCTGTAACGCCGGGAC  
AAGCCGTTGTCTTCTATGACGGCGAAGAATGCCTTGGCGGCGGGACAATTGATGATGTGTACAA  
AGACGGAACAAAATTGTGGTACGTA**GGTAGTGGATCTGGT**ATGGAACGGATTTATTTAGATCAT  
GCCGCAACGTCTCCGATGGATGAGCGCGTGCTGGAACAAATGATACCGCACTTCTCCGGCAGTT  
TCGGTAATCCCTCCAGTATTCATTCATTTGGCAGAGAATCTCGAAAATGGGTGGATGAAGCAAG  
AGCGCAGATCGCAGCAGAAATCGGAGCGGCAGAGCAGGAGATCATTTTTTACAAGCGGGGGAACG  
GAAGCTGATAACTTGGCGATCATGGGAACCGCACTTGCAAGAAAAGATCTTGGCAGACATATCA  
TCACAACAAAAATTGAGCATCACGCCGTGCTTCACACATGTGAAAAACTTGAGGGAGACGGATT  
TGACATAACGTATCTGGACGTTGACCAAAATGGAAGAGTCAGTGCAAAACAGGTGAAAGAAGCA  
CTGCGTGATGATACAATCCTTGTGACAGTGATGTATGGAAATAATGAAGTCGGAACAGTGCAGC  
CGATCGAAGAAATCGGTGAGCTGTAAAGGAACACAAAGCTTATTTTTCATACCGATGCTGTTCA  
GGCATTCGGGTTGCTGCCAATTGATGTGAAAAACAGCCATATTGACCTTCTGTCTGTTTCCGGG  
CACAAGCTCAACGGGCCAAAAGGGACAGGCTTTTTTATATGCTAGTAAAGATGTGAAGCTTTTAC  
CCCTTTTTATTTCGGAGGAGAGCAAGAAAGAAAACGCCGTGCCGGAACGGAAAATGTTCCAGGCAT  
TGTCGGGCTGAAAGAAGCGATCAAGCTGTCAAGTGAAGAACGTGACGAAAAAAACGAGAAGTAT  
CAATCGTTTAAAGCAATCTTTGCCGACACGCTTAGAGATGCAGGTGTGGCATTCGAGGTCAACG  
GGGACAAAGAGCATAGTCTGCCGCATGTTCTGAATCTTTATTTCCCGGTGTGTGAGTGGAAGC  
GCTGCTGGTTAATCTTGATATGGCTGGTGTGCTGTCTCCAGCGGTTTCAGCGTGCACGGCCGGT  
TCAGTCCTGCCGTCACATGTTCTGACTGCTATGTTTCGGCGAAGAGAGTGACCGGCTGACGTCCT  
CTATTCGAATCAGCTTCGGCCTCGGCAATACGGCTGAGCAAGTGAAAACCTGCTGCCAAACATGT  
GGCCGACGTTGTCAAACGGCTGACA
