# Supplementary material for: The Plasmodium falciparum apicoplast cysteine desulfurase provides sulfur for both iron-sulfur cluster assembly and tRNA modification
Source: eLife journal article supplement (doi:10.7554/elife.84491), 2023-05-11

**A**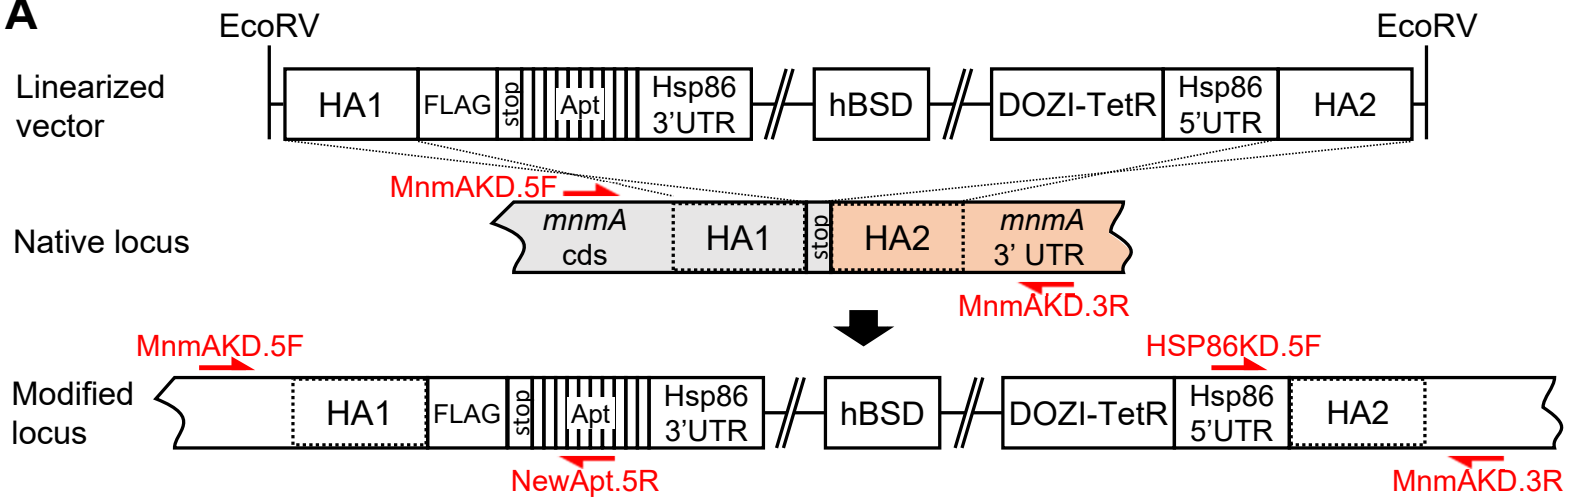**B**

| PCR reaction | Primer combination |           | Anticipated amplicon sizes (bp) | Parasite line                    |
|--------------|--------------------|-----------|---------------------------------|----------------------------------|
|              | Forward            | Reverse   |                                 |                                  |
| $\Delta 5'$  | MnmAKD.5F          | NewApt.5R | 800                             | <i>mnmA</i> -flag                |
| $\Delta 3'$  | HSP86KD.5F         | MnmAKD.3R | 596                             |                                  |
| C            | MnmAKD.5F          | MnmAKD.3R | -                               |                                  |
| $\Delta 5'$  | MnmAKD.5F          | NewApt.5R | -                               | PfMev <sup>attB</sup> (parental) |
| $\Delta 3'$  | HSP86KD.5F         | MnmAKD.3R | -                               |                                  |
| C            | MnmAKD.5F          | MnmAKD.3R | 1160                            |                                  |

**C**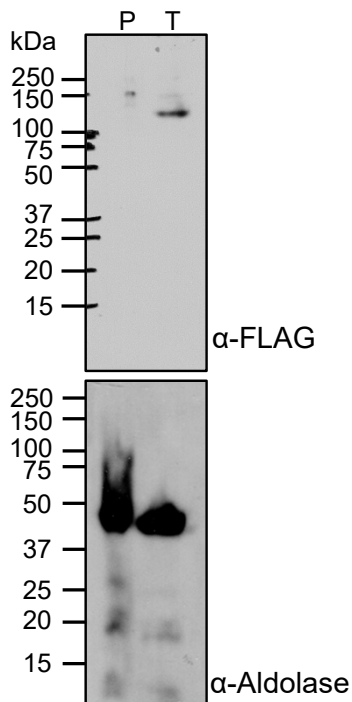

Supplement: supp [file elife-84491-supp-v1.zip]
