# Supplementary material for: The Plasmodium falciparum apicoplast cysteine desulfurase provides sulfur for both iron-sulfur cluster assembly and tRNA modification
Source: eLife journal article supplement (doi:10.7554/elife.84491), 2023-05-11
Supplement: supp [file elife-84491-supp-v1.zip]

Figure 5(A)

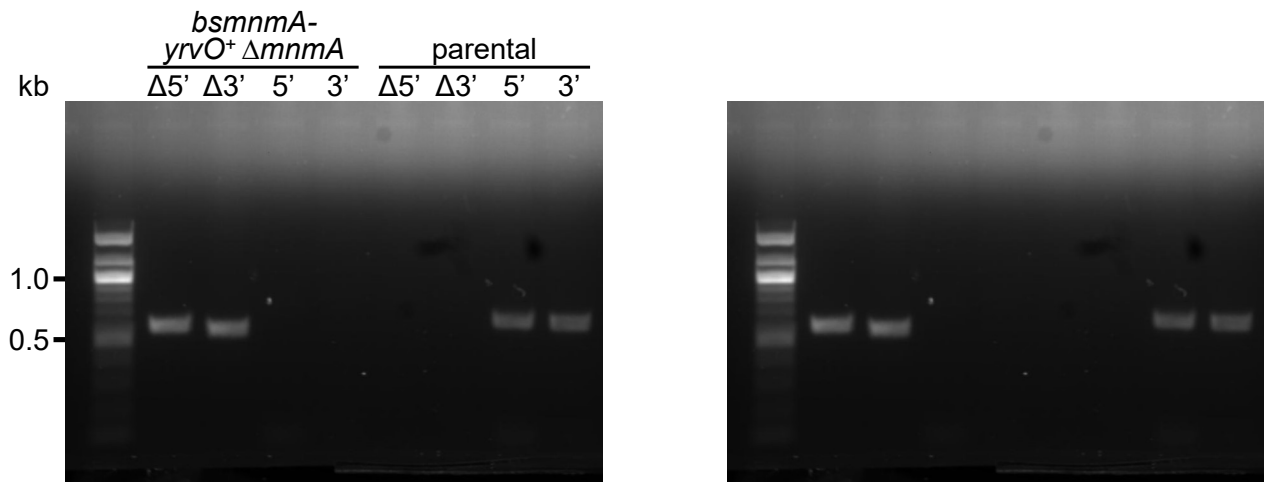

Figure 5(C)

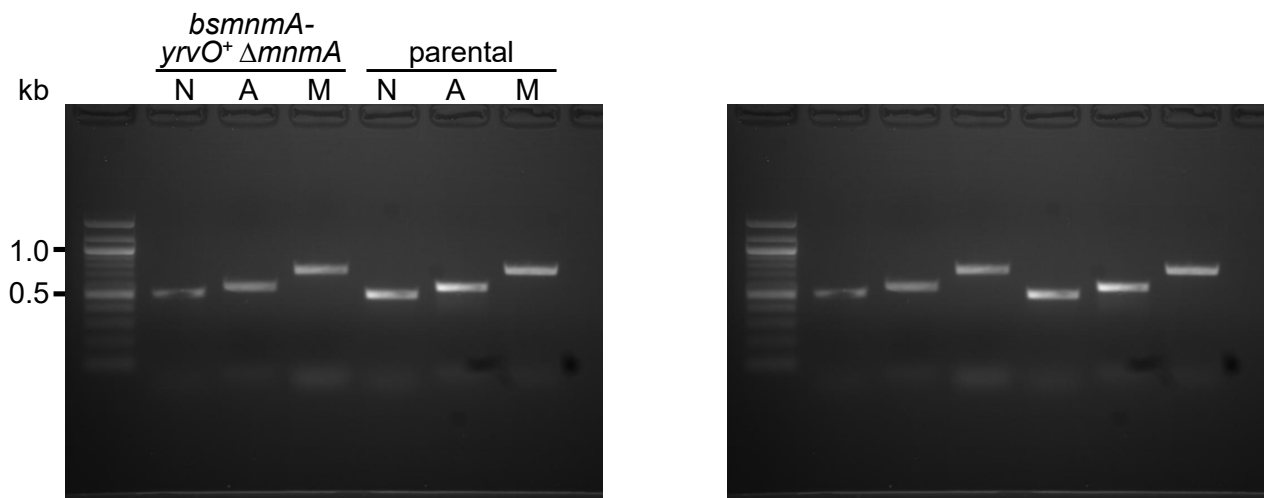

Figure 5- source data 1. Uncropped agarose gel images of PCR analyses presented in Figures 5(A) and 5(C).
