# Supplementary material for: The Plasmodium falciparum apicoplast cysteine desulfurase provides sulfur for both iron-sulfur cluster assembly and tRNA modification
Source: eLife journal article supplement (doi:10.7554/elife.84491), 2023-05-11
Supplement: supp [file elife-84491-supp-v1.zip]

**A**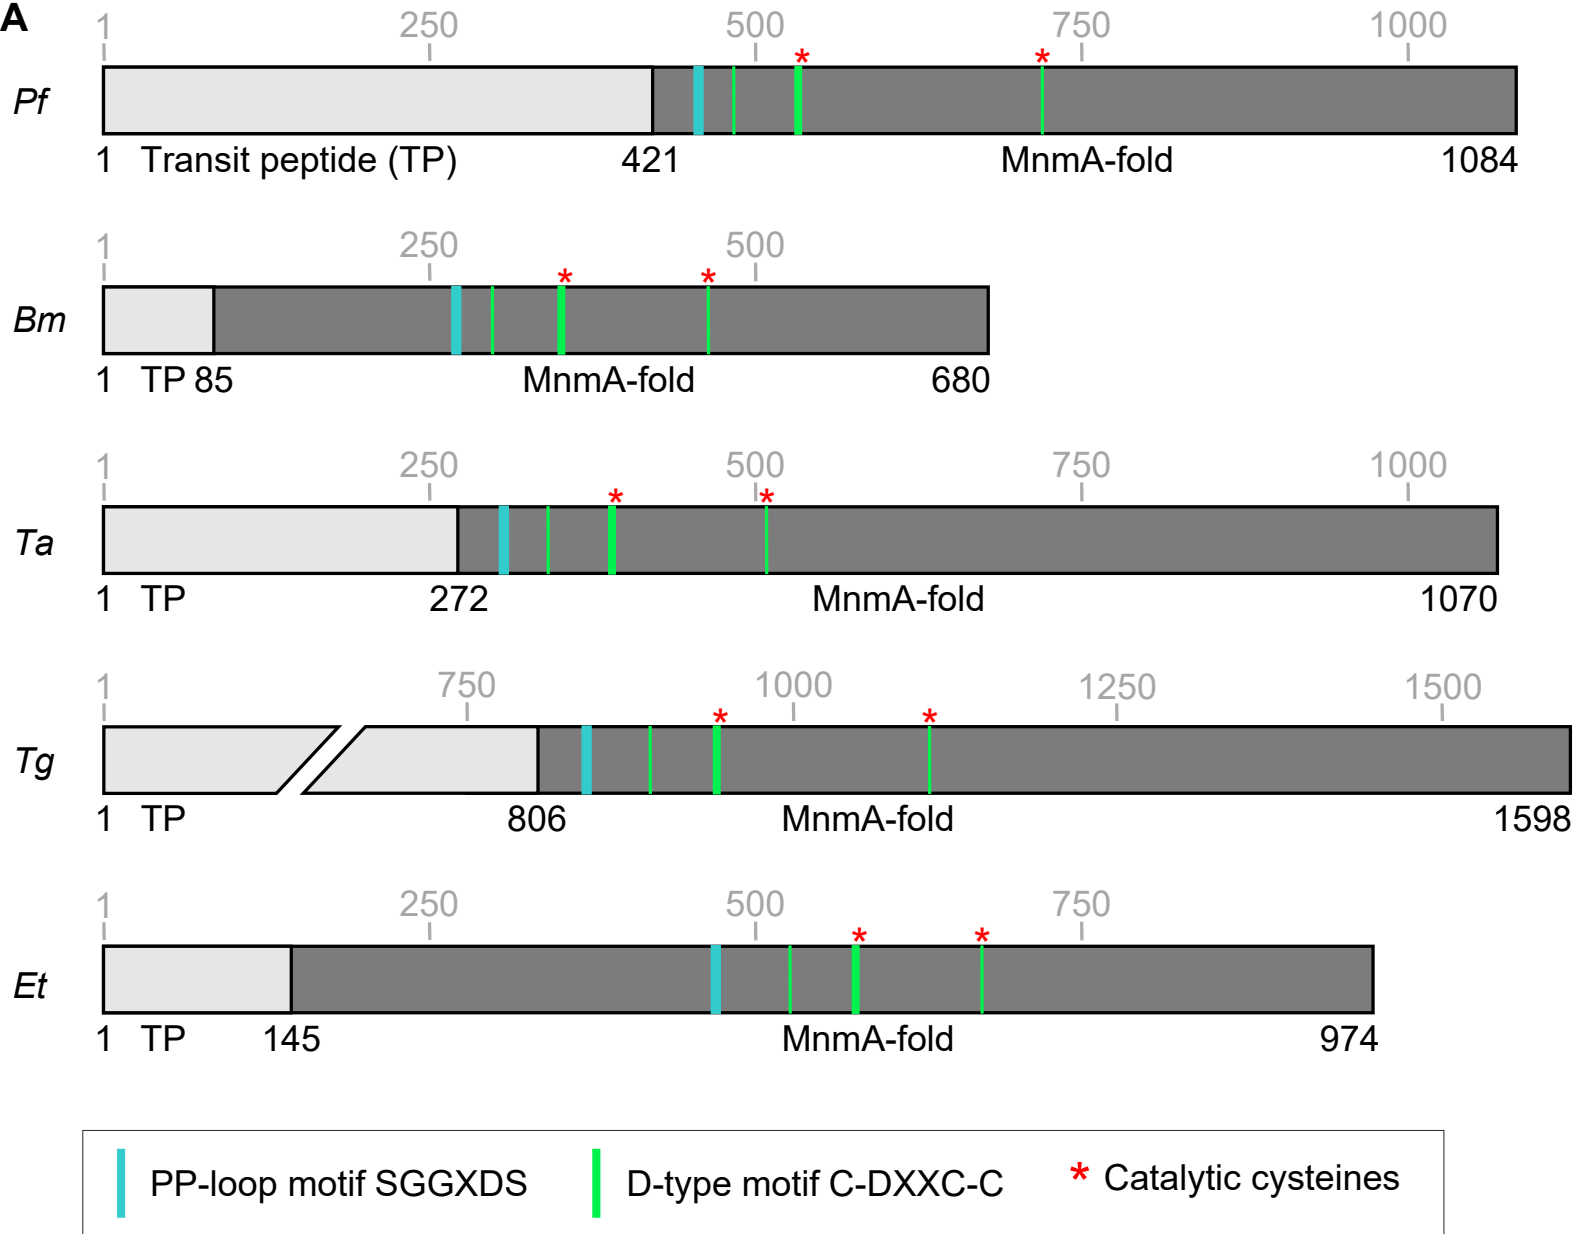**B**

| Percentage (%) sequence identity among apicomplexan MnmA orthologs |                |                |                |                |                |
|--------------------------------------------------------------------|----------------|----------------|----------------|----------------|----------------|
|                                                                    | <i>Pf</i> MnmA | <i>Bm</i> MnmA | <i>Ta</i> MnmA | <i>Tg</i> MnmA | <i>Et</i> MnmA |
| <i>Pf</i> MnmA                                                     |                | 21.13          | 20.37          | 17.51          | 19.15          |
| <i>Bm</i> MnmA                                                     | 21.13          |                | 31.54          | 31.15          | 29.72          |
| <i>Ta</i> MnmA                                                     | 20.37          | 31.54          |                | 23.85          | 15.70          |
| <i>Tg</i> MnmA                                                     | 17.51          | 31.15          | 23.85          |                | 27.02          |
| <i>Et</i> MnmA                                                     | 19.15          | 29.72          | 27.02          | 34.25          |                |
