# Supplementary material for: The Plasmodium falciparum apicoplast cysteine desulfurase provides sulfur for both iron-sulfur cluster assembly and tRNA modification
Source: eLife journal article supplement (doi:10.7554/elife.84491), 2023-05-11
Supplement: supp [file elife-84491-supp-v1.zip]

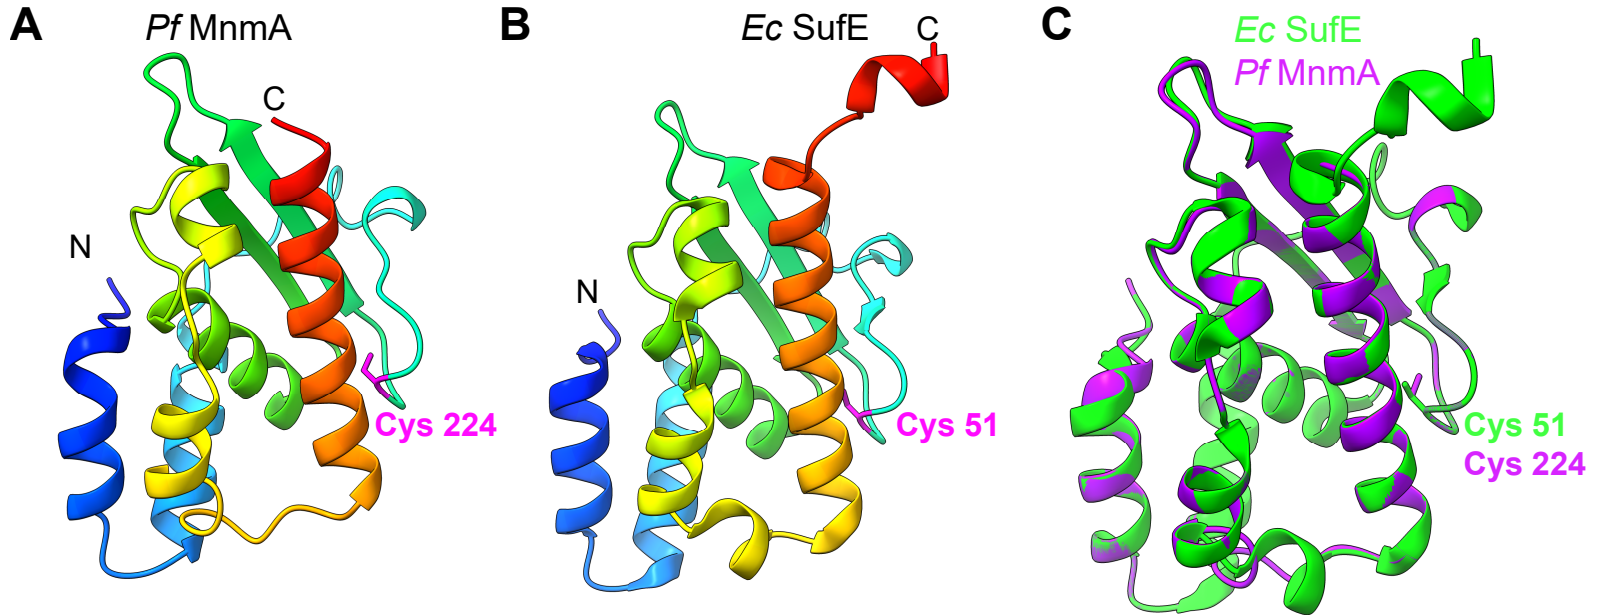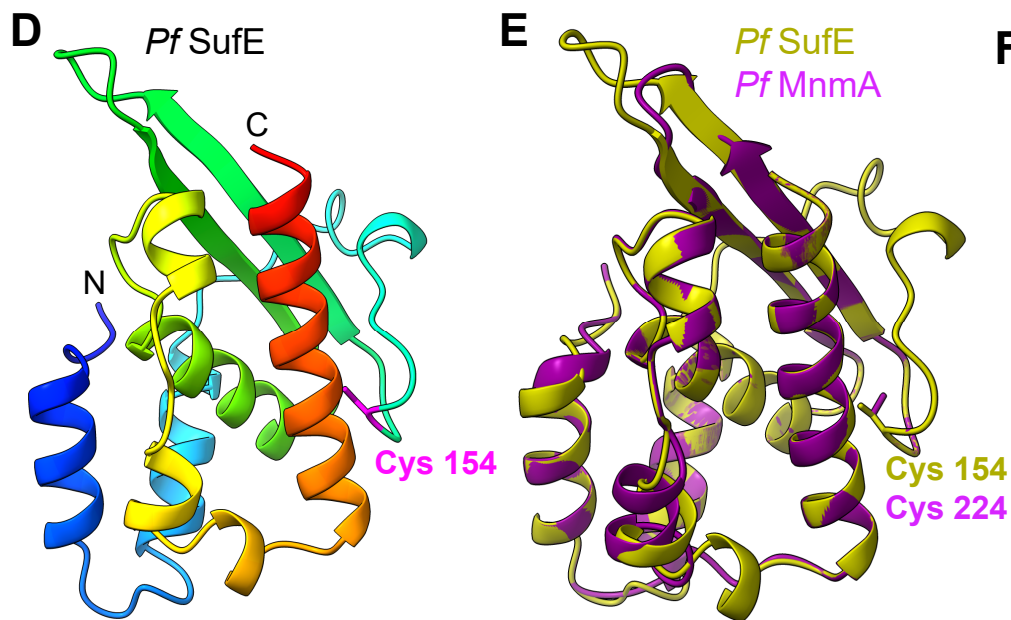

**F** Root mean square deviation (RMSD, Å) values for structural alignments of *Ec* SufE (PDB id: 1MZG) with homology models of *Pf* SufE and SufE-like domains of apicomplexan MnmA orthologs

|                       |              |
|-----------------------|--------------|
| <i>Pf</i> SufE        | 0.664        |
| <b><i>Pf</i> MnmA</b> | <b>0.311</b> |
| <i>Bm</i> MnmA        | 1.200        |
| <i>Ta</i> MnmA        | 0.450        |
| <i>Tg</i> MnmA        | 1.203        |
| <i>Et</i> MnmA        | 1.066        |

**G** *Pf* MnmA  
SufE-like domain (residues 146–380)

INDVQKIYDEVNNIKDKEQKINYLMEQCSSLCKENYFPPILNLNKAYRNKRIDEFNKGKNKIFYINE  
VGKNIWYKYVNR**C**DEILFMAIDIQIDEDQRRNSIKDVHVDVHDDNIKTCTLIKDDKHFEKYKDIHN  
DNILKNILPLDKKIDSIKNMLNHKYMKKKKCIITIDAYSNNLILYCFLYLILKHINKMYLYSFMNI  
QIKEITAKLKEFLDLHFNVHHIIDYIHEYIYNFLMSY

**H** Percentage (%) sequence identity of SufE-like domains

|                       | <i>Ec</i> SufE | <i>Pf</i> SufE | <b><i>Pf</i> MnmA</b> | <i>Bm</i> MnmA | <i>Ta</i> MnmA | <i>Tg</i> MnmA | <i>Et</i> MnmA |
|-----------------------|----------------|----------------|-----------------------|----------------|----------------|----------------|----------------|
| <i>Ec</i> SufE        |                | 43.84          | <b>20.51</b>          | 14.39          | 20.62          | 13.39          | 10.88          |
| <i>Pf</i> SufE        | 43.84          |                | <b>27.59</b>          | 10.88          | 20.71          | 13.77          | 13.07          |
| <b><i>Pf</i> MnmA</b> | <b>20.51</b>   | <b>27.59</b>   |                       | <b>16.52</b>   | <b>35.48</b>   | <b>18.5</b>    | <b>15.04</b>   |
| <i>Bm</i> MnmA        | 14.39          | 10.88          | <b>16.52</b>          |                | 20.83          | 24.02          | 22.9           |
| <i>Ta</i> MnmA        | 20.62          | 20.71          | <b>35.48</b>          | 20.83          |                | 19.92          | 16.23          |
| <i>Tg</i> MnmA        | 13.39          | 13.77          | <b>18.5</b>           | 24.02          | 19.92          |                | 27.07          |
| <i>Et</i> MnmA        | 10.88          | 13.07          | <b>15.04</b>          | 22.9           | 16.23          | 27.07          |                |
