# Supplementary material for: The Plasmodium falciparum apicoplast cysteine desulfurase provides sulfur for both iron-sulfur cluster assembly and tRNA modification
Source: eLife journal article supplement (doi:10.7554/elife.84491), 2023-05-11
Supplement: supp [file elife-84491-supp-v1.zip]

**Sy MnmA** -----MATSPY---PLVA----PEIAGSPSRPRIVAALSGGVDSSVVAAILHEQ 42  
**Bs MnmA** -----MEKRPEDTRVVVGMSSGGVDSSVAALLLKEQ 30  
**Ec MnmA** -----MSETAKKVIIVGMSSGGVDSSVSAWLLQQQ 28  
**At MnmA** -----MPEKPLRVAVLLSGGVDSSVALRLLHAA 28  
**Sc Mtul** MLARYLNLIGRRSASPY---RP-----QRLPAKFDNVIIVAMSSGGVDSSVAAALFAGE 49  
**Pf MnmA** -----MYKKKTTITTTTTTCKKKKNTMKLFYPRIAHMLSGGVDLSMALHLLERK 470  
**Bm MnmA** -----SLYRRSY---GFEVHDLYRLRSKSSSPNKVAMLISSGGVDSSVALWMLKSQ 281  
**Ta MnmA** -----ELKKQDN---PTKGPKRTSMFQSPRSKKRVAVLVSSGGVDSSLALWIMKSR 319  
**Tg MnmA** -----DLFASTT---ETCEEKRELRRSAASSPPQVAVLLSSGGVDSSVSLCLLQQR 853  
**Et MnmA** -----AAKSRVSLPLSDGAGAEVHVLVSSGGVDSAVSLLLMREW 482

**Sy MnmA** GYAVEGVTL--WLMRG-----KGQCC--DGLVDAAAICE 73  
**Bs MnmA** GYDVIGIFMKNWDDTD-----ENGFC--TATEDYEDVIRVCN 65  
**Ec MnmA** GYQVEGLEFMKNWEEDD-----GEEYCTAAADLADAQAVCD 63  
**At MnmA** GHSCTAFYFKIWFQEGFE-----NFWNQ--CPWEDDLKYAKHVCE 66  
**Sc Mtul** FPNTRGVYMQNWSESQSL-----DDPGKEPCY--ERDWRDVNRVAK 88  
**Pf MnmA** KFYVDNYE--FNF-----TNADC--SKNDIKYVKDICK 499  
**Bm MnmA** GYNVHAFYFKAFG-----SDSPG--CTVAEDIRYATDCCN 314  
**Ta MnmA** GFDVQAFHLKVNDL-----SNGPGLC--SSNDISYAMEVCN 353  
**Tg MnmA** GFAPQAFFIKVWLPPELLLVSRHLNRLLD-----SGLAPAAAGG--CGWERDLLFADQVCR 906  
**Et MnmA** GFRPKPIFLKVWAPAAQMKEQLQGRYQQEKLDIAAASATAAAA--CPWREDAKAAA--VAA 541

**Sy MnmA** QLGIPHHIVDSRELFQANIVDYLVAAGYADGITPLPCSQC\*  
**Bs MnmA** QIGIPYYAVNFEKQYYEKVFQYFLDEYKAGRTPNPDVLCNKEIKFKAFLEHA--LSLG--A 122  
**Ec MnmA** KLGIELHTVNFAAEYWDNVFELFLAEYKAGRTPNPDIILCNKEIKFKAFLEFAAEDLG--A 121  
**At MnmA** QVDVPLEVVHLTDEYWERVVSYIEEYRCGRTPNPDVLCNTRIKFGAFMDAI--SDME--Y 123  
**Sc Mtul** HLNIRVDKVNFEQDYWIDVFEPMRLRGYSEGSTPNPDIGCNKFVKFGKLEWLDEKYGTGN 148  
**Pf MnmA** NNKRNLFIININDEYFDEVLPMLFFYADGKVPNPDIMCNQKIKYNFFLKVIKSIYKQKW 559  
**Bm MnmA** VLGVPPLHILPVEDVYNRAVMQYMVEGYRAGNTPNPDVICNREVKFGYFLNLTSEFG--F 372  
**Ta MnmA** ILRVTLHVLPLFSQVYDKHILSDVLDYRKGEVNPDIILCNSRIKFGFLKMA--TDWG--F 410  
**Tg MnmA** QARVPLEVLPQEAYWEGVVQQLDEARQGLTPNPDWWCNQRVKFGAFLDLL--DGRE--T 963  
**Et MnmA** AAGLSLEVVPMQQYVWDRVISGFLEGARAGLTLNPDWSCN\*SSVKFGAFAETL--DAVD--Y 598

**Sy MnmA** SQ-----IATGHYARVRFN----- 145  
**Bs MnmA** DY-----LATGHYARVD----- 134  
**Ec MnmA** DY-----IATGHYVRR----- 133  
**At MnmA** DY-----VGS GHYAKVVHPPADQN----- 142  
**Sc Mtul** YW-----LVTGHYARVMQEM----- 163  
**Pf MnmA** NYRTKS-----KLCNYDFISTGHYAMIRTNDKNNPNNIFNNNLF 598  
**Bm MnmA** DM-----VASGHYARINPOYFIPPOQSNG---- 396  
**Ta MnmA** DY-----VATGHYATLCDDFFTKEQIKSPS--- 435  
**Tg MnmA** RFSARRIAGESEGENEKEEADMPFLRNSSRWTVASGHYARVVPAAETSRRSEEGE--- 1020  
**Et MnmA** R-----IASGHYARILID----- 611

**Sy MnmA** -----SELGRYQLL 154  
**Bs MnmA** -----RSGGKVRML 143  
**Ec MnmA** -----DVDGKSRLI 142  
**At MnmA** -----DASSVLE 149  
**Sc Mtul** -----NGKGLFHLL 172  
**Pf MnmA** IKKKKKKIKNIKKNKNIKKNKNNIKKNKNNNNIYTYNIYNLHNDNIKTNYKNNKYFYKLL 658  
**Bm MnmA** -----TQSSFVRFNELE 408  
**Ta MnmA** -----YLDGC-----TSINGYYRIKRLC 453  
**Tg MnmA** -----DTEDRDED-----GEEDRGDKERGSEEERTRLF 1049  
**Et MnmA** -----EGCPRLI 618

\*

**Sy MnmA** RAVDRQKDQSYFLYDLSQEHLAHS LFPLGNYTKAQTRQIAARYGLVTANKPESQDLCLIE 214  
**Bs MnmA** RGIDENKDQTYFLNQLTEDITLSKVMFPIGELQKSRVREIAKEAELATATKKDSTGICFIG 203  
**Ec MnmA** RGLDSNKDQSYFLYTL SHEQIAQSLFFVGELEKPVVRKIAEDLGLVTAKKDSTGICFIG 202  
**At MnmA** LSQDMVKDQTYFLSHLSQTQLKRLLFPLGCVKKDEVRKLATQFDLPNKDRKDSQGICFLG 209  
**Sc Mtul** RSIYRPKDQSYYSLSQINSTVLSLLLP IGH LTKPEVRDLAKYAGLPTAEK PDSQGICFVN 232  
**Pf MnmA** VSNDKKKDQTF FLS SFNHIQLSKFI FPLSLYTKKDVKKYMNENNINNYNHKETKGLCLFG 718  
**Bm MnmA** TSYYVNKDQTYFLSRLSSAQLGKMICPLGVHKKMVRALAYINGLGTQARDDSMGVCFLG 468  
**Ta MnmA** LSTDTVKDQTYFLSRLNQNQMSRLIFPIGNILKTQVRDFAKTVGLPTYNKKDSFGLCFLE 513  
**Tg MnmA** RGKDRRKDQSYFLSGLSQRQLRRLVTPVGDMEKVEVRRLAAALDLPTARRQDSQGLCFLG 1109  
**Et MnmA** RGVDLTKDQSYFLSGLSSLQLSRLLFVVGALLKTQVRKIAVSWGLPSSQRPDSQGLCFLG 678

**Sy MnmA** T--YGSMRNF LDQHLGQRPGEIVDTQGR----- 240  
**Bs MnmA** E---RNFKTFLSQYLPAQPGDMMTMDGE----- 228  
**Ec MnmA** E---RKFREFLGRYLPAQPGKIITVDGD----- 227  
**At MnmA** K---IKFSDFVCRHIGEMEGII LEAESG----- 234  
**Sc Mtul** NSQHGFKNFLKH YLPSSPGDIITVDPQSG----- 262  
**Pf MnmA** N---IDMQTLLHKYFVNTEKDDIKNKQNE DNI FKENNILN LNNNFNQNEKKKKKEKKLLV 775  
**Bm MnmA** R---LDLRQFLKAHLGETPGQIIDYKSK----- 493  
**Ta MnmA** D---LDLSEYLT KTLGESRGPIVEYETN----- 538  
**Tg MnmA** N---LSLSFFFRHFLGSSTGPVLHFPS C----- 1134  
**Et MnmA** P---LPVSQFLMHL LGE EEPV IHFPTG----- 703

**Sy MnmA** -----VLGSHQGIHHYTVGQRKGLGIASS-- 264  
**Bs MnmA** -----VKGRHDGLMYYTIGQRHGLGIGGS-- 252  
**Ec MnmA** -----EIGE HQGLMYHTLGQRKGLGIGGTK 252  
**At MnmA** -----DFLGNHRGFWFYTI GQRQGLRLPGG-- 259  
**Sc Mtul** -----AKTTWGRHDGLWSYTI GQKVGISMPQAD 290  
**Pf MnmA** DITTTSSHLKKFRET FIPKMNLHYKNYLINLDDQTILDINS DIHLYAIGQHKNVTNYLHN 835  
**Bm MnmA** -----QVIGQHTGLYNYTI GQRQGLGVSIDH 519  
**Ta MnmA** -----KVI GEHNGLYNFTIGQKKTINNYLNP 564  
**Tg MnmA** -----LALGSHDGLWNFTV GQRKGVTPCID-- 1159  
**Et MnmA** -----VSI GRHKGLWGFTV GQQKGVVPLLD-- 728

**Sy MnmA** -----RPLYVVRID-----AAMNRVVVGEREEAT----- 288  
**Bs MnmA** -----GEPWFVAVGKD-----LEKNILYVDQGFHNPLL--- 279  
**Ec MnmA** EG-----TEEPWYVVDKD-----VENNILVVAQGHEHPRL--- 282  
**At MnmA** -----PWYVVEKD-----TKNNVVFVSRNYYSID---K 284  
**Sc Mtul** PN-----YQGTWV FVSEKL-----RDTNEILIVRGRDNPAL--- 320  
**Pf MnmA** LYNKKMININGYKKKHVKNVISS FQWIVVYK KIKRDMSTNLIHNF IYLTKNYDQDLFT-- 893  
**Bm MnmA** GG-----EEGGWFV VSKD-----AASNTLYVTKEYNSRHFTGR 552  
**Ta MnmA** KH-----VGNTPKYVVKKD-----IYKNTLYV SASYNEDFFFTNP 598  
**Tg MnmA** -----VARVRRLS-----SLPDSSL-TPHAASVDSEGS 1186  
**Et MnmA** -----PRLCRRCH-----GASGG----- 741

**Sy MnmA** -----QAEAWVRQVNWVST-PAPDEP--LAVEVQVRY-----RTPAVPATL----- 326  
**Bs MnmA** -----YSDKITATNISWVRS DIMK GEE--ISCTAKFRY-----RQEDHKVTV----- 319  
**Ec MnmA** -----MSVGLIAQQLHWVDRE PFTG-T--MRCTVKTRY-----RQTDI PCTV----- 321  
**At MnmA** RRRIRFRVGS L-----RWNSGKPSG-----KVREL RCKVRHGPGF 318  
**Sc Mtul** -----YSDTMRIENFSS LGPREDTINAFQNTGALTLQF-----RSLQVPVQI----- 362  
**Pf MnmA** ----- 893  
**Bm MnmA** SC-IR--RAFSLAHVRWNNPILLNSHG-----IN-----EAD--YI----- 583  
**Ta MnmA** RG-IR--SSFKVRDFFWNTPDYKDLIN-----KV-----QSEVSDNFKFKV KLRHTPNY 644  
**Tg MnmA** EEQTARAGDSRRRQARAPP GKPTKASA-----TGQGRQAADDEERRLLEAKCHR---DGD 1238  
**Et MnmA** ----- 741

|                |                                                               |      |
|----------------|---------------------------------------------------------------|------|
| <b>Sy MnmA</b> | IP-----ESPERVKLQFAEPQFGVTPGQAAVWYHGDL-----LLGGGILE            | 366  |
| <b>Bs MnmA</b> | RM-----TGEGEAEVIFDEQVRAVTPGQAVVFYDGE-----CLGGGTID             | 359  |
| <b>Ec MnmA</b> | KA-----LDDDRIEVIFDEPVAAVTPGQSAVFYNGEV-----CLGGGIIE            | 361  |
| <b>At MnmA</b> | YSCSFEMEG--DGDVAVVHLDDEDDQGLAAGQFAAFYEGTT-----CIGSGV--        | 362  |
| <b>Sc Mtul</b> | KSCKLN--RSADNLDITIHLSKQRAITPGQSCCLYIDDR-----VLGSGPIS          | 408  |
| <b>Pf MnmA</b> | -----                                                         | 893  |
| <b>Bm MnmA</b> | -----K-----AEWEPPITRRDIKTMQDLTLDRNVASTE----                   | 612  |
| <b>Ta MnmA</b> | NYCNINFKGDEATDL-----QKWLPTTYELAAATIASV--DNSKCSIKMI--          | 687  |
| <b>Tg MnmA</b> | DSCLRSANHTVRGRLECT----DNADRPDGRVVPVLSEGNEAPS-----SSSCSSSAEAD  | 1288 |
| <b>Et MnmA</b> | -----                                                         | 741  |
| <b>Sy MnmA</b> | RPSP-----                                                     | 370  |
| <b>Bs MnmA</b> | DVYKDGTK-----LWYV-----                                        | 371  |
| <b>Ec MnmA</b> | QRLPLPV-----                                                  | 368  |
| <b>At MnmA</b> | -----ILESWDDQCFPVCAKALQLAALED-----KTKLG-----KPVKIMTMPTMS      | 403  |
| <b>Sc Mtul</b> | HVNNNDTH-----A-----                                           | 417  |
| <b>Pf MnmA</b> | -----                                                         | 893  |
| <b>Bm MnmA</b> | -----KLFL---KV-----RNGTVL-----YEAECLKL----                    | 631  |
| <b>Ta MnmA</b> | -----QLILTFCTI-----EDVGF-----HTADSKATTIA                      | 713  |
| <b>Tg MnmA</b> | EGQEEGGDRQSRLSSSSFAACLSGSPQNLFEFANPFRTGLGAASLAGRWVVAAKHPPSN   | 1348 |
| <b>Et MnmA</b> | -----PPKLSGPWSVVGKLEPAN                                       | 759  |
| <b>Sy MnmA</b> | -----                                                         | 370  |
| <b>Bs MnmA</b> | -----                                                         | 371  |
| <b>Ec MnmA</b> | -----                                                         | 368  |
| <b>At MnmA</b> | -----SVEADTGE--ASAE-----QKLVNA-----                           | 421  |
| <b>Sc Mtul</b> | -----                                                         | 417  |
| <b>Pf MnmA</b> | -----HIR                                                      | 896  |
| <b>Bm MnmA</b> | -----SPPIRKGQGVTOHGWAFL-----DRSDPGLAT----GQYAA--LYRGNIC       | 670  |
| <b>Ta MnmA</b> | LFFIFGSKNDEKDGTSIELEDIV-----HEPAPSEHG----SKKSP--SELHIYE       | 757  |
| <b>Tg MnmA</b> | ALFVVSEKEMKAAA--AVAES-----VGYSLDVLAAGPGVRT-LGDSQTYLLALLLTLLQ  | 1398 |
| <b>Et MnmA</b> | ALFVVSKEEEAAAE--DRLRALATEPGNYSEPLGA--PLLRAAANGDKAAALALKLRQLR  | 815  |
| <b>Sy MnmA</b> | -----                                                         | 370  |
| <b>Bs MnmA</b> | -----                                                         | 371  |
| <b>Ec MnmA</b> | -----                                                         | 368  |
| <b>At MnmA</b> | -----                                                         | 421  |
| <b>Sc Mtul</b> | -----                                                         | 417  |
| <b>Pf MnmA</b> | TKCKLHNIKWIEGKLPACIKKQFKKYN-----KINKKKKKINNNNNKY              | 939  |
| <b>Bm MnmA</b> | IGSGIIYQSF-----                                               | 680  |
| <b>Ta MnmA</b> | IGKPIDYLDWKQHKRTNSSQSGRNGTHGKTHTEKRRNSDPTKRKSVHKPQRITSELEQKT  | 817  |
| <b>Tg MnmA</b> | KFLRVDNIQWISHPPCAACNAEEQ-----PVS---RDPSFLGTLGSRDPRARLRGDE     | 1450 |
| <b>Et MnmA</b> | TCLRVDNIRWFHGKAPAGFDASATL-----QPGCLREEGPTL-AAVAASAVAAKT-NTA   | 868  |
| <b>Sy MnmA</b> | -----                                                         | 370  |
| <b>Bs MnmA</b> | -----                                                         | 371  |
| <b>Ec MnmA</b> | -----                                                         | 368  |
| <b>At MnmA</b> | -----                                                         | 421  |
| <b>Sc Mtul</b> | -----                                                         | 417  |
| <b>Pf MnmA</b> | KTN-----ETFHVYNNIQESGKKKKKKKVK--N-----IPH-----                | 968  |
| <b>Bm MnmA</b> | -----                                                         | 680  |
| <b>Ta MnmA</b> | KPNS-PQQTTHKQQTNTKEQNTNKQSSVEQKTKADQSGPITRPF-----SPSV         | 866  |
| <b>Tg MnmA</b> | KSLETADEFAFLRWALEGSRDKRPRLYDVQVRHAAGTACAAIHRVRVRLCLFPPERRSPSF | 1510 |
| <b>Et MnmA</b> | LPMERPA-ESFL----TG-SSKGGAGFVVQVRHSAGFHGVAKHNFKVLVSRGH-----    | 916  |

|                |                                                               |      |
|----------------|---------------------------------------------------------------|------|
| <i>Sy</i> MnmA | -----                                                         | 370  |
| <i>Bs</i> MnmA | -----                                                         | 371  |
| <i>Ec</i> MnmA | -----                                                         | 368  |
| <i>At</i> MnmA | -----                                                         | 421  |
| <i>Sc</i> Mtul | -----                                                         | 417  |
| <i>Pf</i> MnmA | -----DEKTI FVKIRNS-----                                       | 980  |
| <i>Bm</i> MnmA | -----                                                         | 680  |
| <i>Ta</i> MnmA | LKPSEKAERVFSSNEKPAVQQRLFKPRENKYQKRTERYD TDMDFEKIFNPVHENAKDDEP | 926  |
| <i>Tg</i> MnmA | LSPSAVSEESG-----GRRK-----ESRAPFGPSRVETSAGSS                   | 1543 |
| <i>Et</i> MnmA | -----SGNSS                                                    | 921  |
|                |                                                               |      |
| <i>Sy</i> MnmA | -----                                                         | 370  |
| <i>Bs</i> MnmA | -----                                                         | 371  |
| <i>Ec</i> MnmA | -----                                                         | 368  |
| <i>At</i> MnmA | -----                                                         | 421  |
| <i>Sc</i> Mtul | -----                                                         | 417  |
| <i>Pf</i> MnmA | EQIKKAKIKFSLSNNTAYLKVKQKDTGFSPGQIITLYFPFI IKKNNKVTYITNLNKYNNL | 1040 |
| <i>Bm</i> MnmA | -----                                                         | 680  |
| <i>Ta</i> MnmA | GSYMPFESIYDLSLDKCRLNKAFPPKGPAG-----HKFE-----                  | 961  |
| <i>Tg</i> MnmA | GAWTAW-----IELAEPDEGLAPGQIAAIYE GEE-----                      | 1572 |
| <i>Et</i> MnmA | PIEEAE-----LLEEPDVGLAPGQVAAFYRDDE-----                        | 950  |
|                |                                                               |      |
| <i>Sy</i> MnmA | -----                                                         | 370  |
| <i>Bs</i> MnmA | -----                                                         | 371  |
| <i>Ec</i> MnmA | -----                                                         | 368  |
| <i>At</i> MnmA | -----                                                         | 421  |
| <i>Sc</i> Mtul | -----                                                         | 417  |
| <i>Pf</i> MnmA | INTNKNTIYYHCLGSATISNQFLD-----YNLYQH IKNIHQINDLNMS-K-----      | 1084 |
| <i>Bm</i> MnmA | -----                                                         | 680  |
| <i>Ta</i> MnmA | -----CIDLDVIRVSKDFKNISLVNANVIHPKSNTHKICKISFDNKVLVDKVDD        | 1010 |
| <i>Tg</i> MnmA | -----CLGAGRISARQQG-----                                       | 1585 |
| <i>Et</i> MnmA | -----CIGSGRISALQGS-----                                       | 963  |
|                |                                                               |      |
| <i>Sy</i> MnmA | -----                                                         | 370  |
| <i>Bs</i> MnmA | -----                                                         | 371  |
| <i>Ec</i> MnmA | -----                                                         | 368  |
| <i>At</i> MnmA | -----                                                         | 421  |
| <i>Sc</i> Mtul | -----                                                         | 417  |
| <i>Pf</i> MnmA | -----                                                         | 1084 |
| <i>Bm</i> MnmA | -----                                                         | 680  |
| <i>Ta</i> MnmA | SMEFTAVVLEHVRSISILSVISTNPNMERSAIQFVITGKDKINVMNDYVSV MSTILKSEL | 1070 |
| <i>Tg</i> MnmA | -----MAVEAALRSAGL                                             | 1597 |
| <i>Et</i> MnmA | -----FALKSIIDRLG-                                             | 974  |
|                |                                                               |      |
| <i>Sy</i> MnmA | - 370                                                         |      |
| <i>Bs</i> Mnm  | - 371                                                         |      |
| <i>Ec</i> MnmA | - 368                                                         |      |
| <i>At</i> MnmA | - 421                                                         |      |
| <i>Sc</i> Mtul | - 417                                                         |      |
| <i>Pf</i> MnmA | - 1084                                                        |      |
| <i>Bm</i> MnmA | - 680                                                         |      |
| <i>Ta</i> MnmA | - 1070                                                        |      |
| <i>Tg</i> MnmA | N 1598                                                        |      |
| <i>Et</i> MnmA | - 974                                                         |      |

**Figure 3- figure supplement 3- source data 2.** Multiple sequence alignment used for **Figure 3- figure supplement 3(E)**.
