# Supplementary material for: The Plasmodium falciparum apicoplast cysteine desulfurase provides sulfur for both iron-sulfur cluster assembly and tRNA modification
Source: eLife journal article supplement (doi:10.7554/elife.84491), 2023-05-11

**A**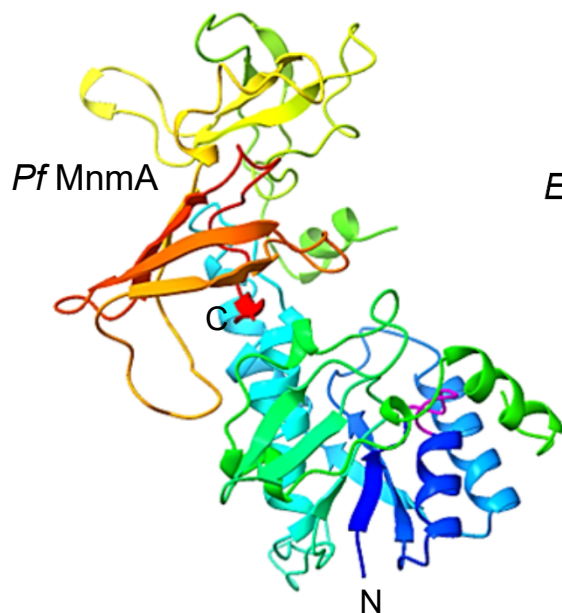**B**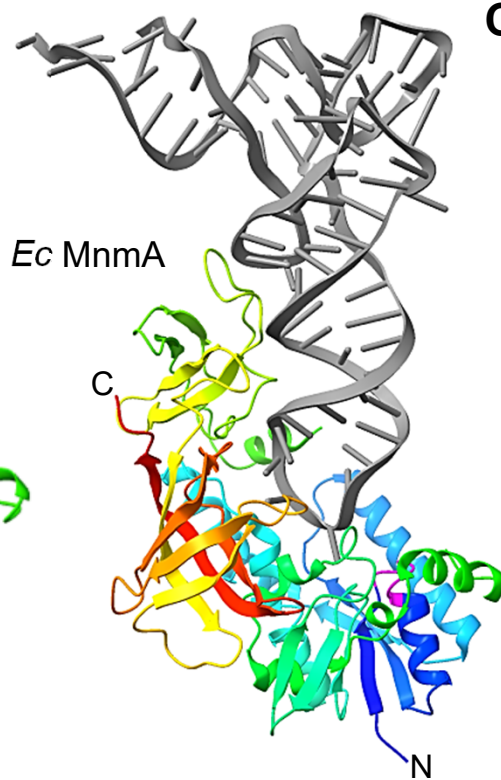**C**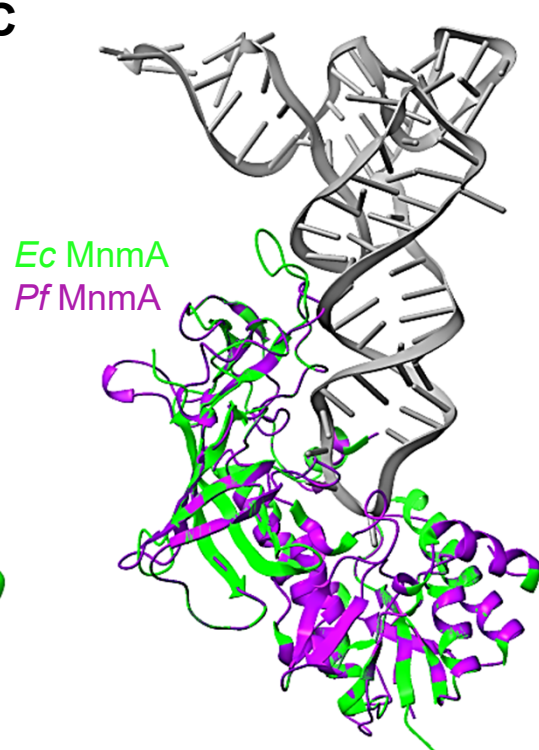**D**

Root mean square deviation (RMSD, Å) values for structural alignments of *Ec* MnmA (PDB id: 2DER) with MnmA homology models

| Sy MnmA | Bs MnmA | At MnmA | Sc Mtu1 | <b><i>Pf</i> MnmA</b> | Bm MnmA | Ta MnmA | Tg MnmA | Et MnmA |
|---------|---------|---------|---------|-----------------------|---------|---------|---------|---------|
| 0.181   | 0.924   | 0.219   | 0.153   | <b>0.264</b>          | 0.170   | 0.200   | 0.153   | 0.943   |

**E**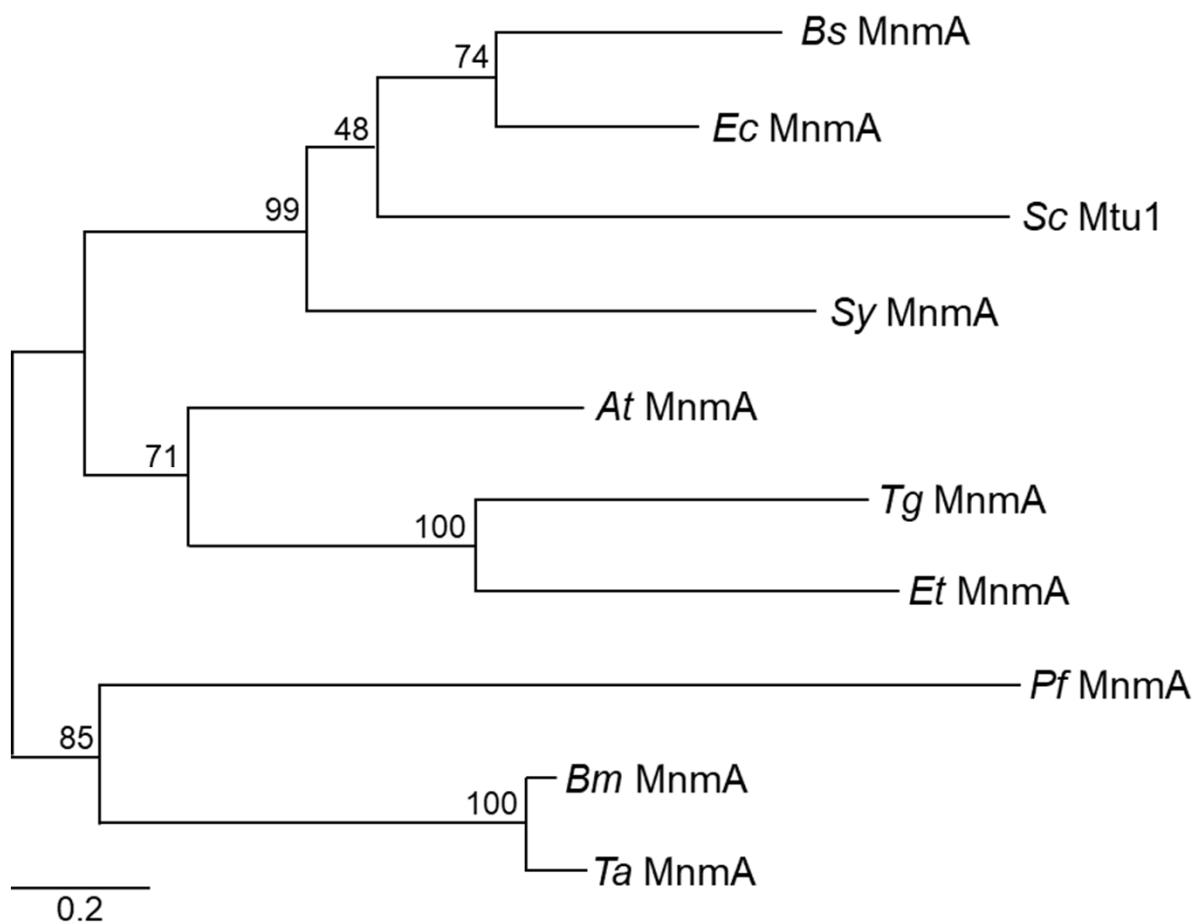

Supplement: supp [file elife-84491-supp-v1.zip]
