# Supplementary material for: The Plasmodium falciparum apicoplast cysteine desulfurase provides sulfur for both iron-sulfur cluster assembly and tRNA modification
Source: eLife journal article supplement (doi:10.7554/elife.84491), 2023-05-11
Supplement: supp [file elife-84491-supp-v1.zip]

**Figure 3(C)**

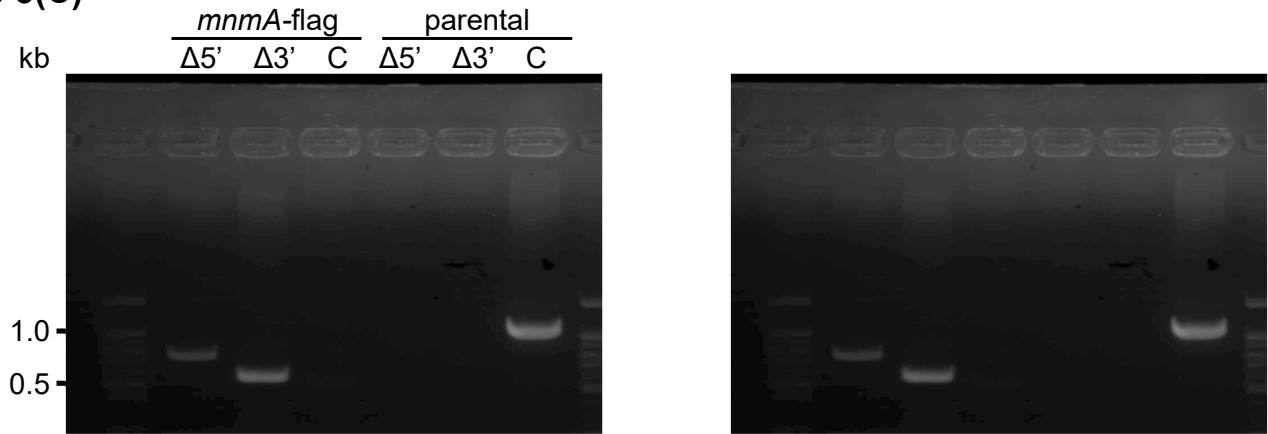

**Figure 3(I)**

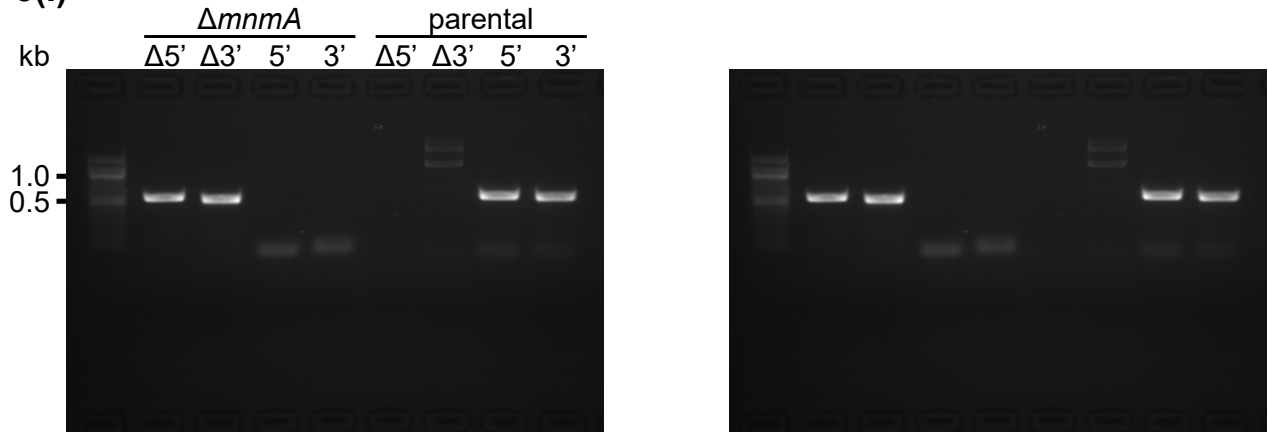

**Figure 3(J)**

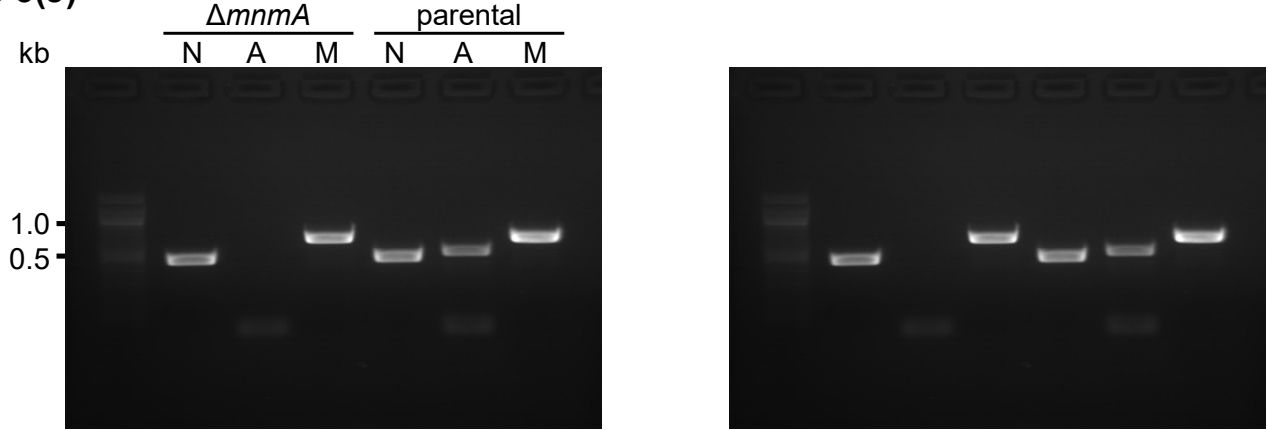

**Figure 3- source data 1.** Uncropped agarose gel images of PCR analyses presented in **Figures 3(C), 3(I), and 3(J).**
