# Supplementary material for: The Plasmodium falciparum apicoplast cysteine desulfurase provides sulfur for both iron-sulfur cluster assembly and tRNA modification
Source: eLife journal article supplement (doi:10.7554/elife.84491), 2023-05-11

A

| Percentage (%) sequence identity among MnmA orthologs |                |                |                |                |                |                |
|-------------------------------------------------------|----------------|----------------|----------------|----------------|----------------|----------------|
|                                                       | <i>Pf</i> MnmA | <i>Sy</i> MnmA | <i>Bs</i> MnmA | <i>Ec</i> MnmA | <i>At</i> MnmA | <i>Sc</i> Mtu1 |
| <i>Pf</i> MnmA                                        |                | 22.70          | 25.75          | 24.92          | 27.64          | 23.65          |
| <i>Sy</i> MnmA                                        | 22.70          |                | 51.50          | 56.37          | 43.97          | 41.32          |
| <i>Bs</i> MnmA                                        | 25.75          | 51.50          |                | 69.92          | 51.58          | 48.00          |
| <i>Ec</i> MnmA                                        | 24.92          | 56.37          | 69.92          |                | 52.37          | 45.96          |
| <i>At</i> MnmA                                        | 27.64          | 43.97          | 51.58          | 52.37          |                | 40.94          |
| <i>Sc</i> Mtu1                                        | 23.65          | 41.32          | 48.00          | 45.96          | 40.94          |                |

B

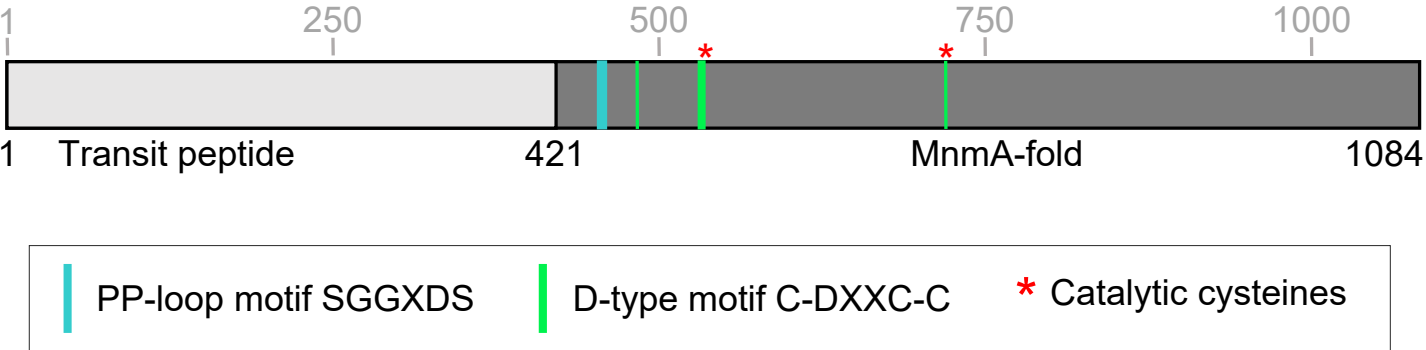

Supplement: supp [file elife-84491-supp-v1.zip]
