# Supplementary material for: The Plasmodium falciparum apicoplast cysteine desulfurase provides sulfur for both iron-sulfur cluster assembly and tRNA modification
Source: eLife journal article supplement (doi:10.7554/elife.84491), 2023-05-11
Supplement: supp [file elife-84491-supp-v1.zip]

**A**

|           |              |                                                                |     |
|-----------|--------------|----------------------------------------------------------------|-----|
| <i>Pf</i> | <i>SufS</i>  | -----MLRGPRCLYI-----YLFV---FLPFSFCYIRNNDNR                     | 30  |
| <i>Bs</i> | <i>SufS</i>  | -----                                                          | 0   |
| <i>Ec</i> | <i>SufS</i>  | -----                                                          | 0   |
| <i>At</i> | <i>cNif1</i> | -----MEGVAMK-----LP---SFPNA---ISIGHRS                          | 21  |
| <i>Pf</i> | <i>IscS</i>  | MKFLQIIKHL-KL-QNKKNALDNFVNCRTYEHISNINKLFLNFSSTKEHSEHGQVKHEN    | 58  |
| <i>Bs</i> | <i>YrvO</i>  | -----                                                          | 0   |
| <i>Ec</i> | <i>IscS</i>  | -----                                                          | 0   |
| <i>At</i> | <i>mNif1</i> | MASKVIS---ATIRRTLTKPHGTFSRCR-----YL---STA---AA-----            | 32  |
| <i>Sc</i> | <i>Nfs1</i>  | MLKSTATRSITRLSQVYNVPAATYRACLVSRR-----FY---SPP---AAGVKLDDN      | 46  |
| <i>Pf</i> | <i>SufS</i>  | FVY-----IVKSIRKGPNIK-----LR-----                               | 47  |
| <i>Bs</i> | <i>SufS</i>  | -----                                                          | 0   |
| <i>Ec</i> | <i>SufS</i>  | -----                                                          | 0   |
| <i>At</i> | <i>cNif1</i> | FSR-----VRCSSLSV---CSAA-----                                   | 37  |
| <i>Pf</i> | <i>IscS</i>  | FLNSTLKYEENSQNGSTNNLNKNGKYNMYVSEGNVNINEEKYKDNNISSNNTQYNNNSNS   | 118 |
| <i>Bs</i> | <i>YrvO</i>  | -----                                                          | 0   |
| <i>Ec</i> | <i>IscS</i>  | -----                                                          | 0   |
| <i>At</i> | <i>mNif1</i> | -----                                                          | 32  |
| <i>Sc</i> | <i>Nfs1</i>  | FS-----LEHTDIQA-----AAKAQASARASAS                              | 70  |
| <i>Pf</i> | <i>SufS</i>  | -LTKDEKPNIDNHIIDYFKNVREHFPFFKE---NKSIIYFDSAATTHKPSCVIEKMSEFY   | 103 |
| <i>Bs</i> | <i>SufS</i>  | -----MNITDIREQFPILHQQVNGHDLVYLDASAATSQKPRAVIETLDKYY            | 45  |
| <i>Ec</i> | <i>SufS</i>  | -----MIFSVDKVRADFPVLSREVNGLPLAYLDSAASAQKPSQVIDAEAEFY           | 47  |
| <i>At</i> | <i>cNif1</i> | -AASSATISTDSESVSLGHRVRKDFERILHQEVNGSKLVYLDASAATSQKPAAVLDALQNY  | 96  |
| <i>Pf</i> | <i>IscS</i>  | GSLNDEGPL-WKEHID-----DVVVENKKKKMNRFYLDQATTMIDPRVLDKMLPYM       | 169 |
| <i>Bs</i> | <i>YrvO</i>  | -----MERYLDHAATSPMDERVLQMI PHF                                 | 26  |
| <i>Ec</i> | <i>IscS</i>  | -----MKLPIYLDYSATTPVDPRVAEKMMQFM                               | 27  |
| <i>At</i> | <i>mNif1</i> | ---ATEV---NYEDE-----SIMMGVRI SGRPLYLDMQATTPIDPRVFDAMNASQ       | 77  |
| <i>Sc</i> | <i>Nfs1</i>  | GTTDPDAVVASGSTAMS-----HAYQENTGFGTRPIYLDQATTPTDPRVLDTMLKFY      | 122 |
| <i>Pf</i> | <i>SufS</i>  | --KKENSNIHRGIYKLSHNATNNYEKVRETIKEYINCEKNDNIIFTNGSTYGLNVVCKMM   | 161 |
| <i>Bs</i> | <i>SufS</i>  | --NQYNSNVHRGVHTLGTTRADGYEGAREKVRKFINAKSMAEIIFTKGTTSLSNMVALSY   | 103 |
| <i>Ec</i> | <i>SufS</i>  | --RHGYAAVHRGIHTLSAQATEKMENVRKRASLFINARSAEELVFVRGTTEGINLVANSW   | 105 |
| <i>At</i> | <i>cNif1</i> | --EFYNSNVHRGIHYLSAKATDEFELARKKVARFINASDSREIVFTRNATEAINLVAYSW   | 154 |
| <i>Pf</i> | <i>IscS</i>  | --TYIYGNNAHSRNHFFGWESEKAVE DARTNLLNLINGKNNKEIIFTSGATESNNLALIGI | 227 |
| <i>Bs</i> | <i>YrvO</i>  | --SGSFGNPSS-IHSFGRESRKWVDEARAQIAAEIG-AAEQEIIFTSGGTEADNLAIMGT   | 82  |
| <i>Ec</i> | <i>IscS</i>  | TMDGTGFGNPASRSHRFGWQAEAVDIARNQIADLVG-ADPREIVFTSGATESDNLAIKGA   | 86  |
| <i>At</i> | <i>mNif1</i> | --IHEYGNPHSRTHLYGWEAENAVENARNQVAKLIE-ASPKEIVFVSGATEANNMAVKGV   | 134 |
| <i>Sc</i> | <i>Nfs1</i>  | --TGLYGNPHSNTHSYGWE TNTAVENARAHVAKMIN-ADPKEIIFTSGATESNNMVLKGV  | 179 |
|           |              | *                                                              |     |
| <i>Pf</i> | <i>SufS</i>  | IEEI--IKKEEDEIYLSYMEHHSNIIPWQEYINKEKKGRIKYVPLNKS GYINIKKLISNM  | 219 |
| <i>Bs</i> | <i>SufS</i>  | ARAN---LKPGDEVVITYMEHHANIIPWQQAVKA-TGATLKYIPLQEDGTISLEDVRET V  | 159 |
| <i>Ec</i> | <i>SufS</i>  | GNSN---VRAGDNIIISQMEHHANIPWQMLCAR-VGAELRVIPLNPDGTLQLETLP TLF   | 161 |
| <i>At</i> | <i>cNif1</i> | GLSN---LKPGDEVILTVAEHHSCIPWQIVSQK-TGAVLKFVTLNEDEVDPDINKLRELI   | 210 |
| <i>Pf</i> | <i>IscS</i>  | CTYYNKLNKQKNHIITSQIEHKCILQTCRFLQ-T-KGFEVTYLKPDTNGLVKLDDIKNSI   | 285 |
| <i>Bs</i> | <i>YrvO</i>  | ALARKD---LGRHIITTKIEHHA VLHTCEKLE-G-DGFDITYLDVDQNGRVS AKQVKEAL | 137 |
| <i>Ec</i> | <i>IscS</i>  | ANFYQK---KKGHIITSKTEHKAVL DTCRQLE-R-EGFEVTYLAPQRNGIIDLKELEAM   | 141 |
| <i>At</i> | <i>mNif1</i> | MHFYKD---TKKHVIT TQTEHKCVL DSCRHLQ-Q-EGFEVTYLPVKTDGLVDLEMLREAI | 189 |
| <i>Sc</i> | <i>Nfs1</i>  | PRFYKK---TKKHIIITRTEHKCVLEAARAMM-K-EGFEVTF LNVDQGLIDLKELEDAI   | 234 |
| <i>Pf</i> | <i>SufS</i>  | NINTKVISICHASNVIGNIQNIEKI IKKIKNVYPHIIIIIDASQSFAHIKYDIKMKKNK   | 279 |
| <i>Bs</i> | <i>SufS</i>  | TSNTKI VAVSHVSNVLGTVNPIKEMAKIAHDNG--AVIVVDGAQSTPHMKIDVQDLD---  | 214 |
| <i>Ec</i> | <i>SufS</i>  | DEKTRLLAITHVSNVLGTENPLAEMITLAHQG--AKVLVDGAQAVMHHPVDVQALD---    | 216 |
| <i>At</i> | <i>cNif1</i> | SPKTKLVAVHHVSNVLASSLP IEEIVVAHDVG--AKVLVDACQSVPHMVVDVQKLN---   | 265 |
| <i>Pf</i> | <i>IscS</i>  | KDNTIMASFIFVNNEIGV IQDIENIGNLCKEKN--ILFHTDASQAAGKVPIDVQKMN---  | 340 |
| <i>Bs</i> | <i>YrvO</i>  | RDDTILVTVMYGNNEVGT VQPIEEIGELLKEHK--AYFHTDAVQAFGLLPIDVKN SH--- | 192 |
| <i>Ec</i> | <i>IscS</i>  | RDDTILV SIMHVNNEIGVVQDIAAIGEMCRARG--IIYHVDATQSVGKLPIDLSQLK---  | 196 |
| <i>At</i> | <i>mNif1</i> | RPDTGLV SIMAVNNEIGVVQPMEEIGMICKEHN--VPFHTDAAQAIGKIPVDVKKWN---  | 244 |
| <i>Sc</i> | <i>Nfs1</i>  | RPDTC LVSVM AVNNEIGV IQPIKEIGAICRKNK--IYFHTDAAQAYGKIHDVNMEN--- | 289 |

\*

|                 |                                                              |     |
|-----------------|--------------------------------------------------------------|-----|
| <b>Pf SufS</b>  | SCPDILITSGHKFCASLGTGFIFINKELSSKYKFKPLLYGSNIITNVSKYKSKFVTSLS  | 339 |
| <b>Bs SufS</b>  | --CFFALSSHKMCGPTGVGVLYGKALLE--NMEPAEFGGEMIDFVGLYE-STWKELPW   | 269 |
| <b>Ec SufS</b>  | --CDFYVFSGHKLYGPTGIGILYVKEALLQ--EMPPWEGGSMIATVSLSEGTTWTKAPW  | 272 |
| <b>At cNif1</b> | --ADFLVASSHKMCGPTGIGFLYGKSDLLH--SMPPFLGGGEMISDVFLDH-STYAEPPS | 320 |
| <b>Pf IscS</b>  | --IDLMSMSGHKLYGPKGIGALYIKRKKP-NIRLNALIHGGGQ-----ER           | 382 |
| <b>Bs YrvO</b>  | --IDLLSVSGHKLNGPKGTGFLYASK---DVKLSPLLFGGEQ-----ER            | 231 |
| <b>Ec IscS</b>  | --VDLMSFSGHKIYGPKGIGALYVRR-KP-RVRIEAQMHHGGGH-----ER          | 237 |
| <b>At mNif1</b> | --VALMSMSAHKIYGPKGVGALYVRR-RP-RIRLEPLMNGGGQ-----ER           | 285 |
| <b>Sc Nfs1</b>  | --IDLLSISSHKIYGPKGIGAIYVRR-RP-RVRLEPLLSGGGQ-----ER           | 330 |

|                 |                                                              |     |
|-----------------|--------------------------------------------------------------|-----|
| <b>Pf SufS</b>  | LLETGTQNIPIGILSMGISLEFFKKINWNYVYQYEMYLYDLFIYMNKYMKNHFV-QLPNL | 398 |
| <b>Bs SufS</b>  | KFEAGTPIIAGAIIGLGAIDFLEEIGLDEISRHEHKL-----AYALERFR-QLDGV     | 320 |
| <b>Ec SufS</b>  | RFEAGTPNTGGIIGLGAALYVVSALGLNNAIEYEQNL-----HYALSQLE-SVPDL     | 323 |
| <b>At cNif1</b> | RFEAGTPAIGEAIALGAAVDYLSGIGMPKIHIEYEVEIG-----KYLKLS-SLPDV     | 371 |
| <b>Pf IscS</b>  | GLRSGTLPHTLIVGFGEAAKVCLEMN-R---DEKKVRYFF---NYVKDYLTKHLDYI    | 433 |
| <b>Bs YrvO</b>  | KRRAGTENVPGIVGLKEAIKLSSEERD-E---KNEKYQSFK---AIFADTLRDAGVAF   | 282 |
| <b>Ec IscS</b>  | GMRSGTLPVHQIVGMGEAYRIAKEEMA-T---EMERLRGLR---NRLWNGIKDI-EEV   | 287 |
| <b>At mNif1</b> | GLRSGTGATQQIVGFGAACELAMKEME-Y---DEKWKGLQ---ERLLNGVREKLDGV    | 336 |
| <b>Sc Nfs1</b>  | GLRSGTLAPPLVAGFGEAARLMKKEFD-N---DQAHIKRLS---DKLVKGLLSA-EHT   | 380 |

|                 |                                                               |     |
|-----------------|---------------------------------------------------------------|-----|
| <b>Pf SufS</b>  | NLSYKKEININYKSHMQTHPPVHKYNDEQNFTNDHNITQSKQTKSIHSQHDTFKIYTHDTR | 458 |
| <b>Bs SufS</b>  | TVYGPPE-----                                                  | 327 |
| <b>Ec SufS</b>  | TLYGPQN-----                                                  | 330 |
| <b>At cNif1</b> | RIYGPRP-----                                                  | 378 |
| <b>Pf IscS</b>  | VFNGCQINR-----                                                | 442 |
| <b>Bs YrvO</b>  | EVNGDKEHS-----                                                | 291 |
| <b>Ec IscS</b>  | YLNGLDLEHG-----                                               | 296 |
| <b>At mNif1</b> | VVNGSMDSR-----                                                | 345 |
| <b>Sc Nfs1</b>  | TLNGSPDHR-----                                                | 389 |

\*

|                 |                                                              |     |
|-----------------|--------------------------------------------------------------|-----|
| <b>Pf SufS</b>  | KYGLKKIGIILPLWSNTFSSFDLVTFLDF-KNICIRAGHHCASLLH--KYLLKV-----  | 508 |
| <b>Bs SufS</b>  | ----RAGLVTFNLDVHPHDVATVLD-EGIAVRAGHHCAPLM--KW-LDV-----       | 371 |
| <b>Ec SufS</b>  | ----RLGVIAFNLGKHHAYDVGSFLDN-YGIAVRTGHHCAMPLM--AY-YNV-----    | 374 |
| <b>At cNif1</b> | SESVHRGALCSFNVEGLHPTDLATFLDQQHGVAIRSGHHCAPLH--RY-LGV-----    | 428 |
| <b>Pf IscS</b>  | ----YYGNMNI SFLFVEGESLLMSL---NEIALSSGSACTSSTLEPSYVLRSI-GISED | 493 |
| <b>Bs YrvO</b>  | ----LPHVLNLYFPGVSVEALLVNLDM-AGVAVSSGSACTAGSVLPSHVLTA MFGEESD | 345 |
| <b>Ec IscS</b>  | ----APNILNVSFNVEGESLIMAL---KDLAVSSGSACTSASLEPSYVLRAL-GLNDE   | 347 |
| <b>At mNif1</b> | ----YVGNLNL SFAYVEGESLLMGL---KEVAVSSGSACTSASLEPSYVLRAL-GVDED | 396 |
| <b>Sc Nfs1</b>  | ----YPGCVNVSFAYVEGESLLMAL---RDIALSSGSACTSASLEPSYVLHAL-GKDDA  | 440 |

\*

|                 |                                                                 |     |
|-----------------|-----------------------------------------------------------------|-----|
| <b>Pf SufS</b>  | --PDTSRISIIYFYNTPQEI KYLAQQIASTSFMLNEMKNEK-----                 | 566 |
| <b>Bs SufS</b>  | --TATARASFYLYNTEEEIDKLVEALQKTKEYFTNVF-----                      | 429 |
| <b>Ec SufS</b>  | --PAMCRASLAMYNTHEEVDRLV TGLQRIHRLG-----                         | 432 |
| <b>At cNif1</b> | --NASARASLYFYNTKDDVDAFIVALADTVSFFNSFK-----                      | 486 |
| <b>Pf IscS</b>  | IAHTSIRIGFNRF TTFE VQQLCINLVKSVERLR SISPLYEMELEKKNPSND DIPKFIWT | 553 |
| <b>Bs YrvO</b>  | RLTSSIRISIFGLGNTAEQVKTA AKHVADVVKRLT-----                       | 405 |
| <b>Ec IscS</b>  | LAHSIRFSLGRFTTEEEIDYTI ELVRK SIGRLRDLSPLEWEM YKQGV----DLNSIEWA  | 402 |
| <b>At mNif1</b> | MAHTSIRFGIGRFTTKEEIDKAVELTVKQVEKLEMSPLYEMVKEGI----DIKNIQWS      | 451 |
| <b>Sc Nfs1</b>  | LAHSIRFGIGRFTSTEEVDYVVKAVSDRVKFLRELSPLWEMVQEGI----DLNSIKWS      | 495 |

|                 |    |     |          |
|-----------------|----|-----|----------|
| <b>Pf SufS</b>  | -- | 546 |          |
| <b>Bs SufS</b>  | -- | 406 |          |
| <b>Ec SufS</b>  | -- | 406 | Class II |
| <b>At cNif1</b> | -- | 463 |          |
| <b>Pf IscS</b>  | -- | 553 |          |
| <b>Bs YrvO</b>  | -- | 379 |          |
| <b>Ec IscS</b>  | HH | 404 | Class I  |
| <b>At mNif1</b> | QH | 453 |          |
| <b>Sc Nfs1</b>  | GH | 497 |          |

**B**

| <b>Percentage (%) sequence identity among the cysteine desulfurases</b> |                |                |                |                 |                |                |                |                 |                |
|-------------------------------------------------------------------------|----------------|----------------|----------------|-----------------|----------------|----------------|----------------|-----------------|----------------|
|                                                                         | <i>Pf SufS</i> | <i>Bs SufS</i> | <i>Ec SufS</i> | <i>At cNif1</i> | <i>Pf IscS</i> | <i>Bs YrvO</i> | <i>Ec IscS</i> | <i>At mNif1</i> | <i>Sc Nfs1</i> |
| <i>Pf SufS</i>                                                          |                | <b>45.57</b>   | <b>41.53</b>   | <b>40.98</b>    | <b>28.41</b>   | <b>33.89</b>   | <b>34.37</b>   | <b>29.62</b>    | <b>29.73</b>   |
| <i>Bs SufS</i>                                                          | <b>45.57</b>   |                | 67.08          | 67.23           | 36.13          | 42.68          | 39.95          | 38.21           | 38.55          |
| <i>Ec SufS</i>                                                          | <b>41.53</b>   | 67.08          |                | 63.11           | 35.66          | 38.86          | 36.95          | 36.56           | 35.75          |
| <i>At cNif1</i>                                                         | <b>40.98</b>   | 67.23          | 63.11          |                 | 30.24          | 38.82          | 37.62          | 36.65           | 34.31          |
| <i>Pf IscS</i>                                                          | <b>28.41</b>   | 36.13          | 35.66          | 30.24           |                | 58.91          | 69.25          | 54.95           | 55.94          |
| <i>Bs YrvO</i>                                                          | <b>33.89</b>   | 42.68          | 38.86          | 38.82           | 58.91          |                | 62.76          | 59.42           | 60.47          |
| <i>Ec IscS</i>                                                          | <b>34.37</b>   | 39.95          | 36.95          | 37.62           | 69.25          | 62.76          |                | 76.30           | 73.51          |
| <i>At mNif1</i>                                                         | <b>29.62</b>   | 38.21          | 36.56          | 36.65           | 54.95          | 59.42          | 76.30          |                 | 66.87          |
| <i>Sc Nfs1</i>                                                          | <b>29.73</b>   | 38.55          | 35.75          | 34.31           | 55.94          | 60.47          | 73.51          | 66.87           |                |

**Figure 7- figure supplement 1- source data 1. (A)** Multiple sequence alignment used for **Figure 7- figure supplement 1. (B)** Table showing the percentage sequence identity among cysteine desulfurase orthologs based on the sequence alignment shown in panel (A).
