# Supplementary material for: The Plasmodium falciparum apicoplast cysteine desulfurase provides sulfur for both iron-sulfur cluster assembly and tRNA modification
Source: eLife journal article supplement (doi:10.7554/elife.84491), 2023-05-11
Supplement: supp [file elife-84491-supp-v1.zip]

A

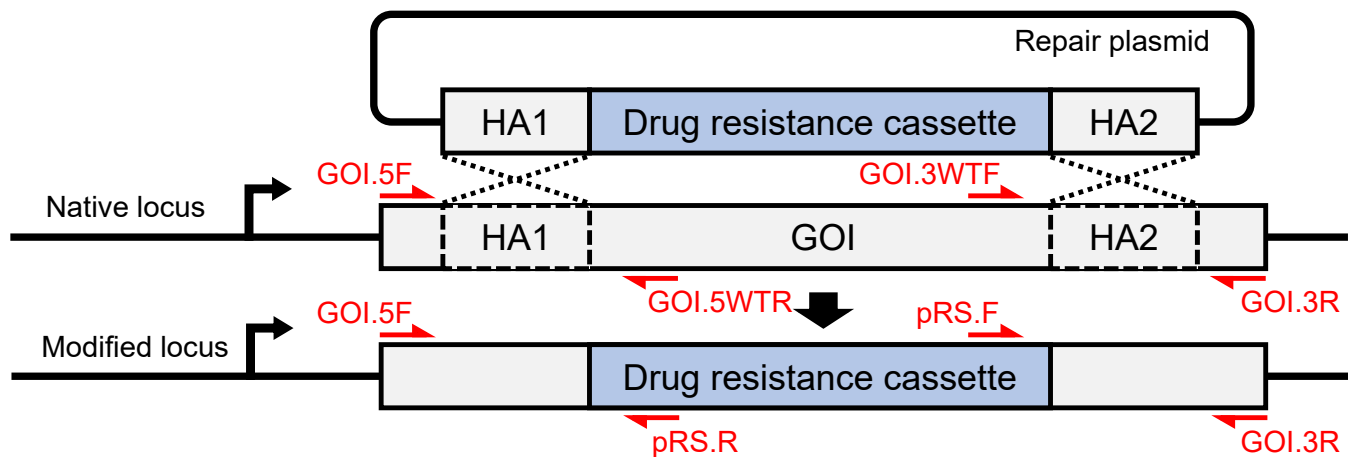

B

| PCR reaction | Primer combination |          | Parasite line       |
|--------------|--------------------|----------|---------------------|
|              | Forward            | Reverse  |                     |
| $\Delta 5'$  | GOI.5F             | pRS.R    | Gene knockout lines |
| $\Delta 3'$  | pRS.F              | GOI.3R   |                     |
| 5'           | GOI.5F             | GOI.5WTR |                     |
| 3'           | GOI.3WTF           | GOI.3R   |                     |
| $\Delta 5'$  | GOI.5F             | pRS.R    | PfMev (parental)    |
| $\Delta 3'$  | pRS.F              | GOI.3R   |                     |
| 5'           | GOI.5F             | GOI.5WTR |                     |
| 3'           | GOI.3WTF           | GOI.3R   |                     |

C

| Gene of interest | Anticipated amplicon sizes (bp) |             |     |     |
|------------------|---------------------------------|-------------|-----|-----|
|                  | $\Delta 5'$                     | $\Delta 3'$ | 5'  | 3'  |
| <i>sufC</i>      | 467                             | 389         | 486 | 457 |
| <i>sufD</i>      | 593                             | 582         | 636 | 649 |
| <i>sufE</i>      | 490                             | 543         | 556 | 656 |
| <i>sufS</i>      | 584                             | 677         | 691 | 754 |
| <i>mnmA</i>      | 605                             | 577         | 626 | 617 |
