# Supplementary figures and images for: The Plasmodium falciparum apicoplast cysteine desulfurase provides sulfur for both iron-sulfur cluster assembly and tRNA modification
Source: eLife journal article supplement (doi:10.7554/elife.84491), 2023-05-11

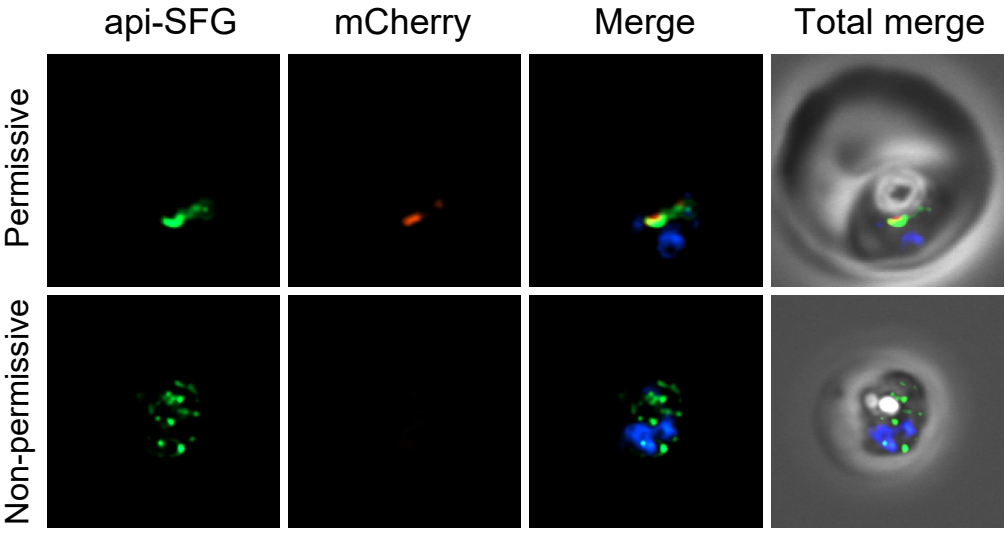

Supplement: supp [file elife-84491-supp-v1.zip]

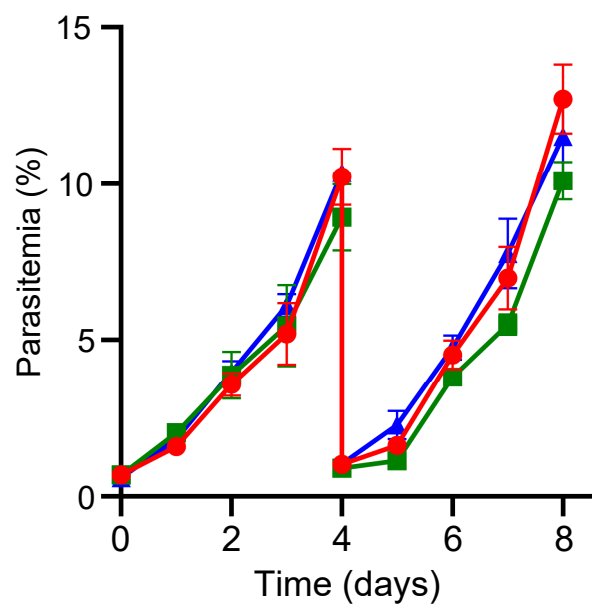

n.s. | n.s. |

- *bsmnmA-yrvO<sup>+</sup> ΔmnmA*
- *bsmnmA<sup>+</sup> ΔmnmA* Clone 10C
- ▲ *bsmnmA<sup>+</sup> ΔmnmA* Clone 10E

Supplement: supp [file elife-84491-supp-v1.zip]

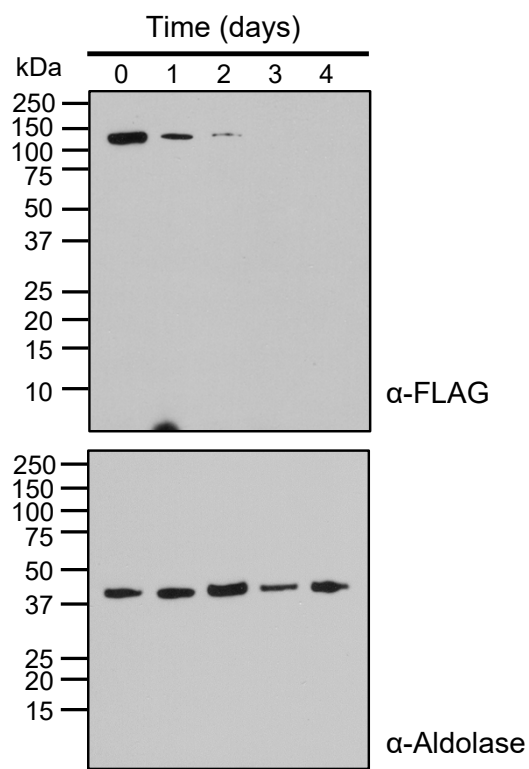

Supplement: supp [file elife-84491-supp-v1.zip]

**A**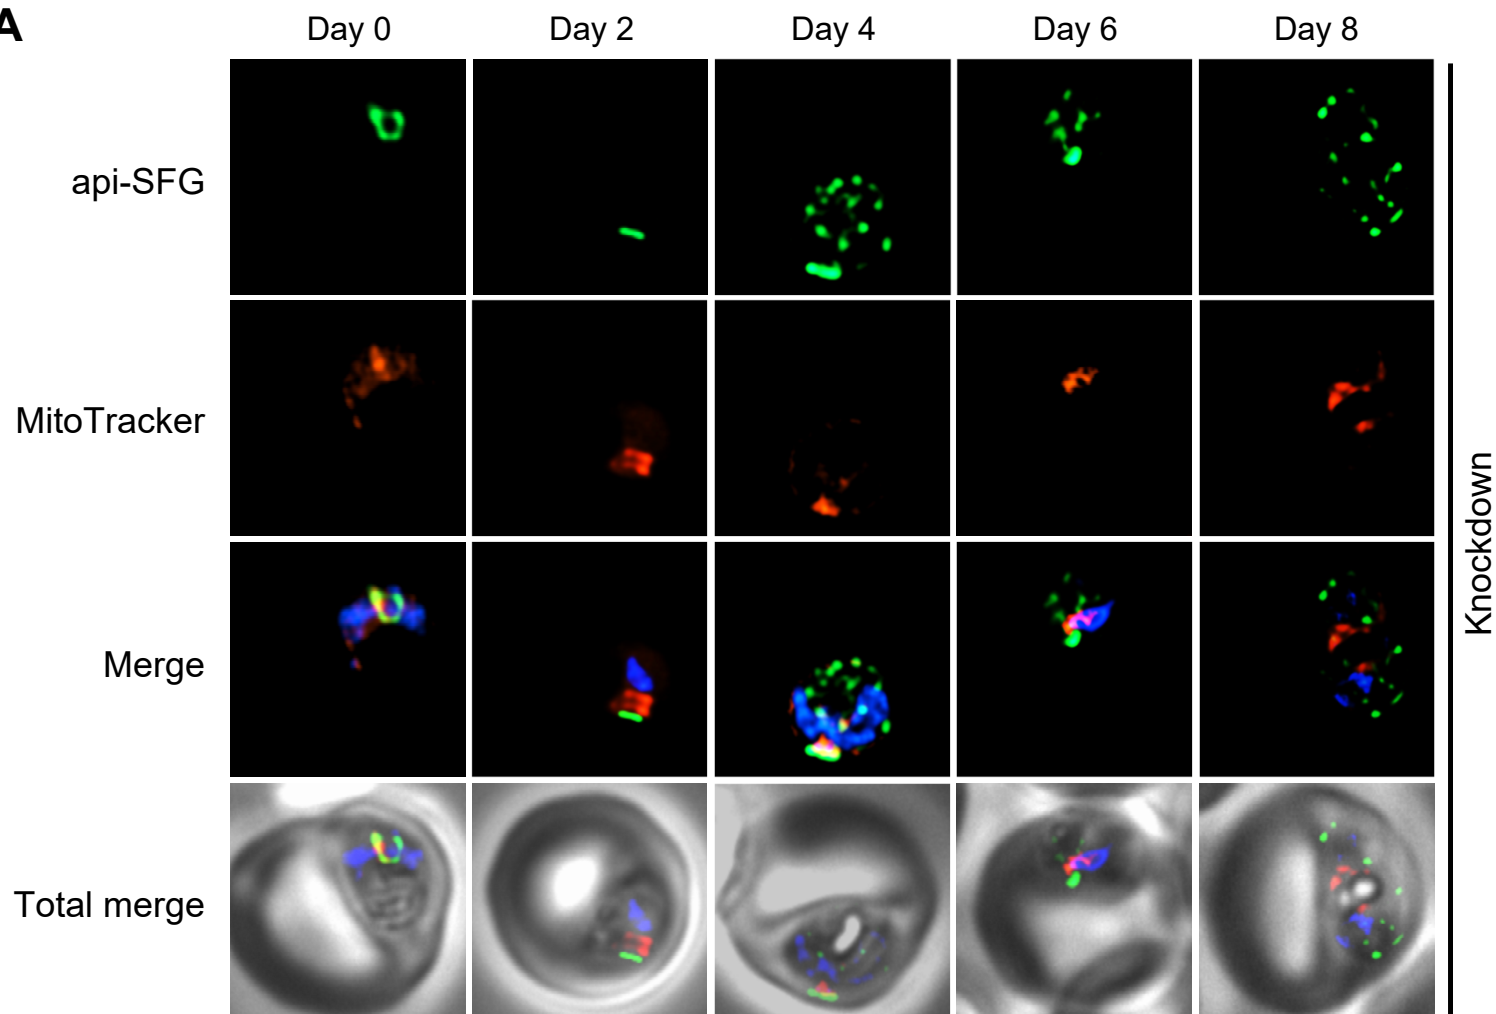**B**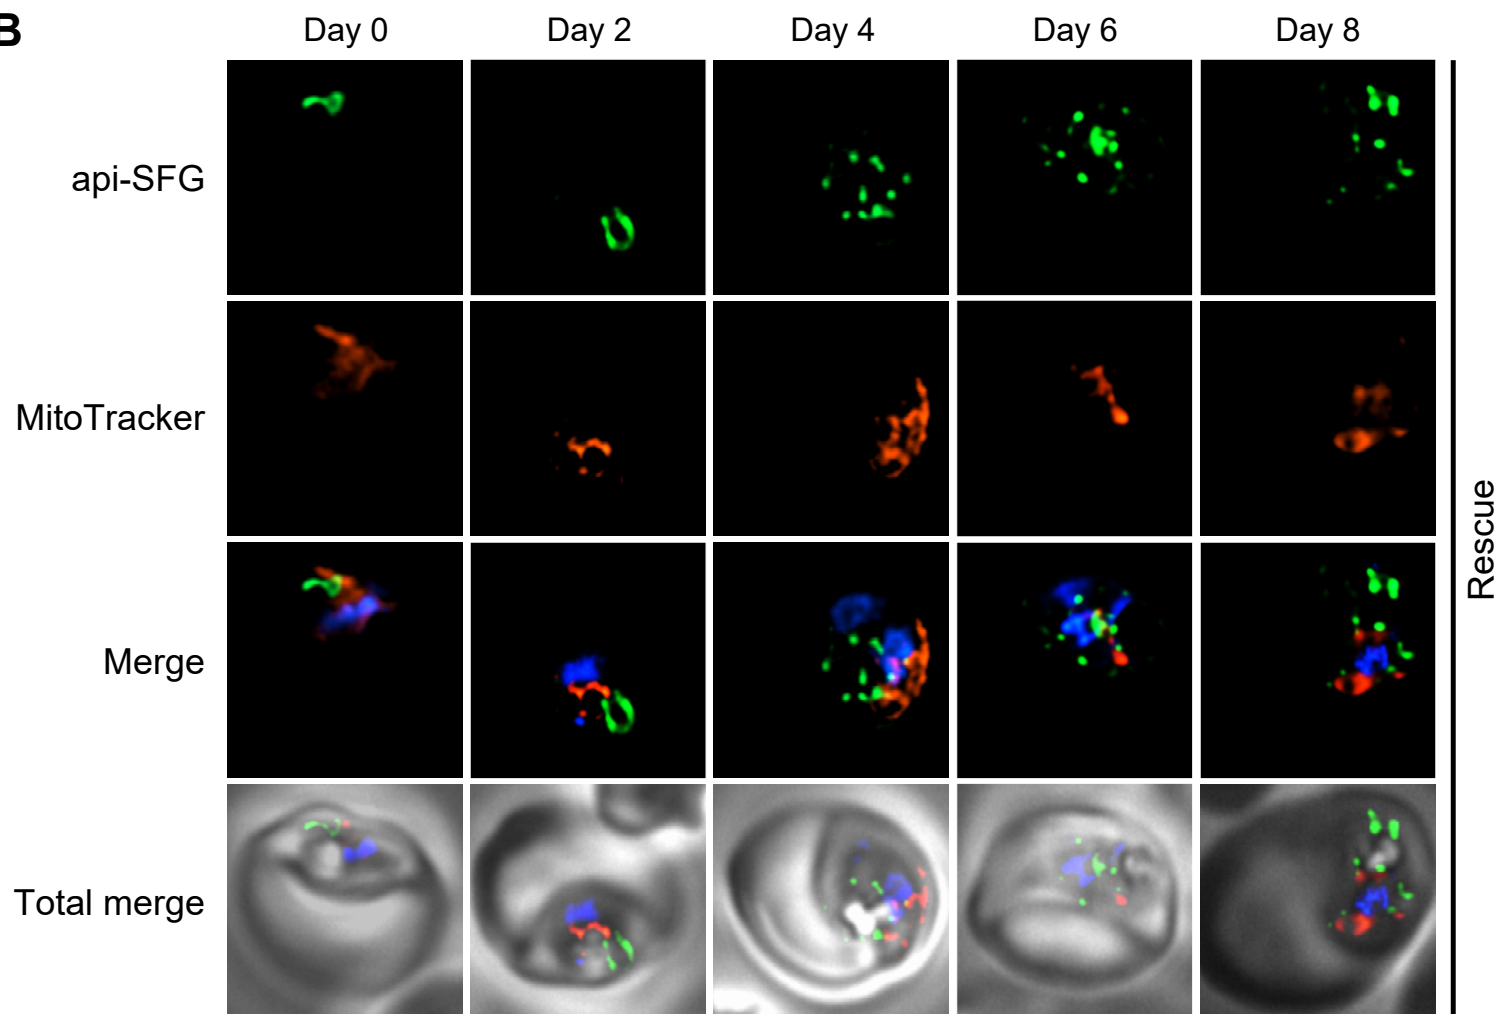

Supplement: supp [file elife-84491-supp-v1.zip]

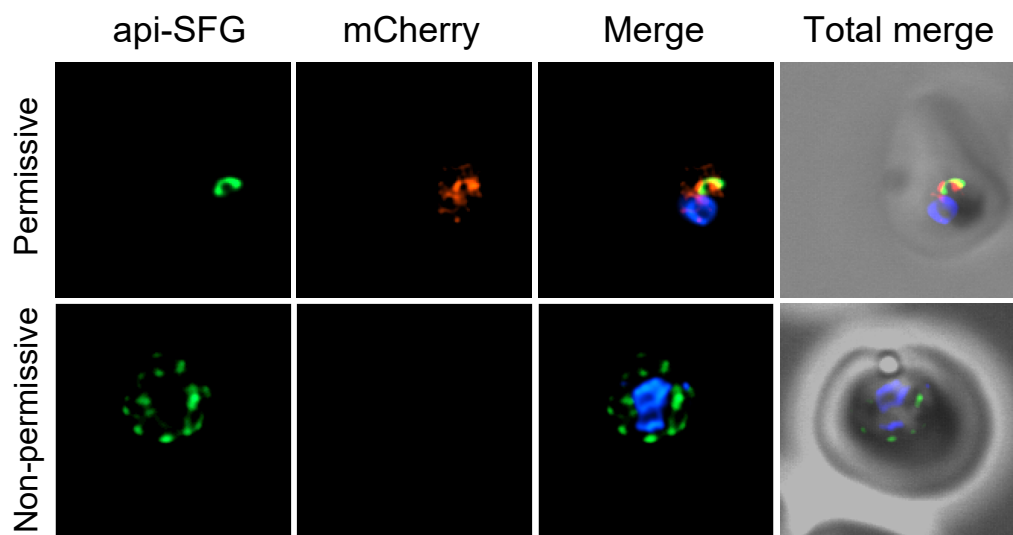

Supplement: supp [file elife-84491-supp-v1.zip]

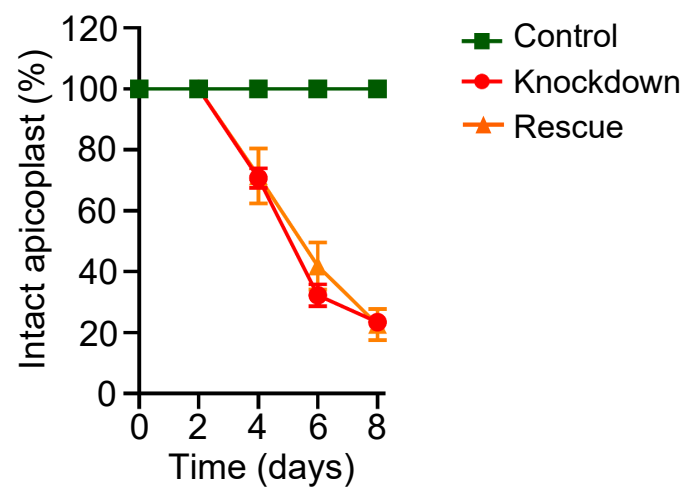

Supplement: supp [file elife-84491-supp-v1.zip]

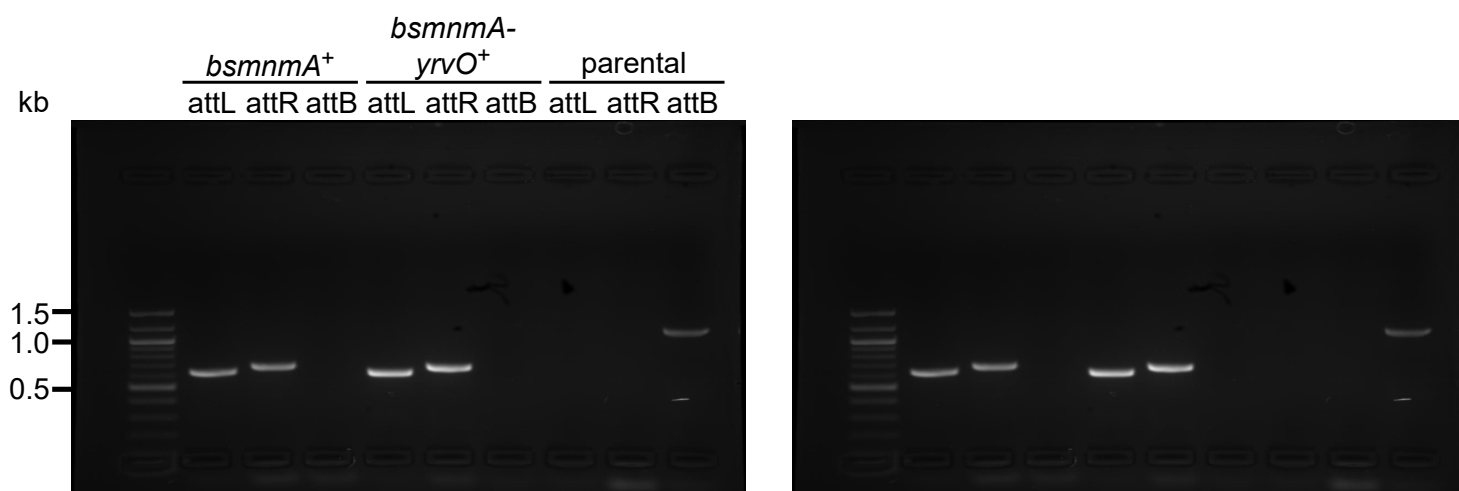

**Figure 4- source data 1.** Uncropped agarose gel images of PCR analyses presented in Figure 4(B).

Supplement: supp [file elife-84491-supp-v1.zip]
